# Supplementary material for: ASCL1-regulated DARPP-32 and t-DARPP stimulate small cell lung cancer growth and neuroendocrine tumour cell proliferation
Source: PubMed Central journal article supplement (PMC7463034; doi:10.1038/s41416-020-0923-6), 2020-06-05
Supplement: 41416_2020_923_MOESM1_ESM.pdf [file 41416_2020_923_MOESM1_ESM.pdf]

## Supplementary Figures and Tables:

|                                                                                           |              |
|-------------------------------------------------------------------------------------------|--------------|
| Supplementary Figures 1-8:                                                                | p. 2 - 9     |
| Supplementary Table 1: List of primers used in this study                                 | p. 10        |
| Supplementary Table 2: Immunostaining scores of patient-derived human SCLC tissue samples | p. 11        |
| Supplementary Table 3: List of upregulated genes with fold change relative to normal      | p. 12 - 84   |
| Supplementary Table 4: List of downregulated genes with fold change relative to normal    | p. 85 - 148  |
| Supplementary Table 5: List of Notch pathway genes enriched in GSEA                       | p. 149       |
| Supplementary Table 6: List of genes from 4 pathways enriched in GSEA                     | p. 150 - 161 |

## Supplementary Figure 1

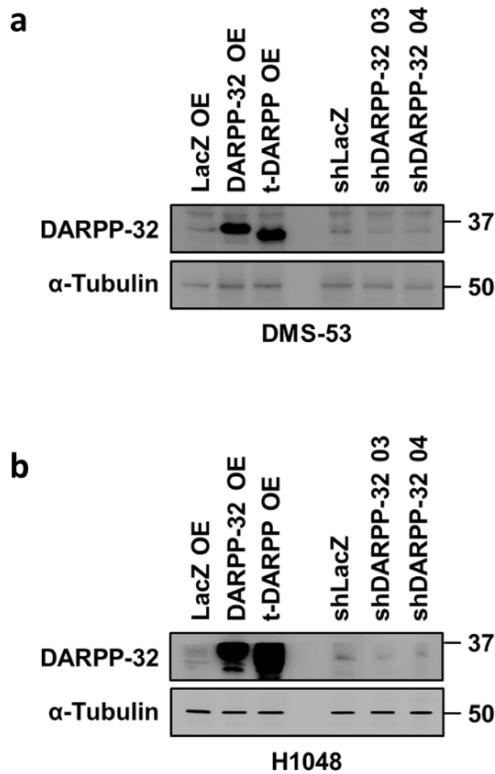

**Supplementary Figure 1: Depletion and overexpression of DARPP-32 isoforms in SCLC cells.** **a-b** DMS-53 (**a**: left 3 lanes) and H1048 cells (**b**: left 3 lanes) transduced with retrovirus encoding LacZ (control), DARPP-32, and t-DARPP cDNAs were subjected to western blot using antibodies against DARPP-32 and  $\alpha$ -Tubulin (loading control). Cell lysates from DMS-53 (**a**: right 3 lanes) and H1048 (**b**: right 3 lanes) cells transduced with shRNA encoded to knockdown LacZ or DARPP-32 (i.e. shDARPP-32 03 and shDARPP-32 04 represent two distinct shRNAs) were used to detect DARPP-32 expression.

## Supplementary Figure 2

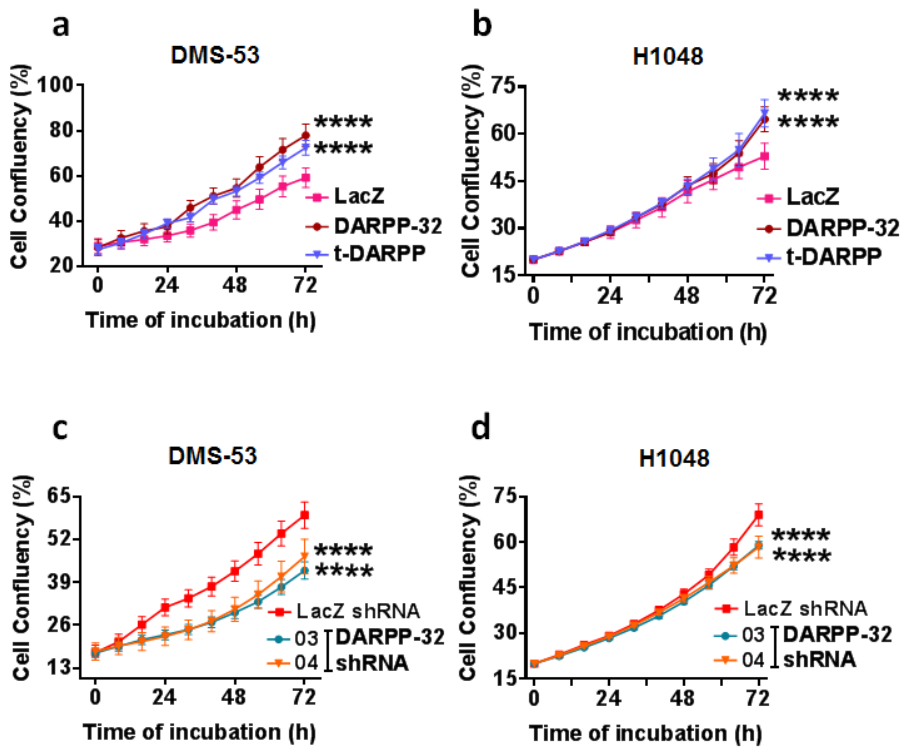

**Supplementary Figure 2: DARPP-32 isoforms promote cell growth and proliferation.** a-b DMS-53 (a) and H1048 (b) cells expressing control-, DARPP-32- or t-DARPP-overexpressing clones were seeded into 96-well cell culture plates. Images were captured at every 6h interval using IncuCyte® live cell analysis imaging system. Cell confluency was determined by measuring the area occupied by the cells in each well. c-d DMS-53 (c) and H1048 (d) cells were transduced with lentivirus encoding control shRNA (LacZ) or DARPP-32 shRNAs (clone numbers 03 and 04). The cell-occupied area in each well was assessed using the IncuCyte® live cell analysis imaging system. The line graph represents average values of three independent experiments. Error bars indicate SEM. \*\*\*\*P<0.0001, 2-way ANOVA followed by Dunnett's test for multiple comparison.

### Supplementary Figure 3

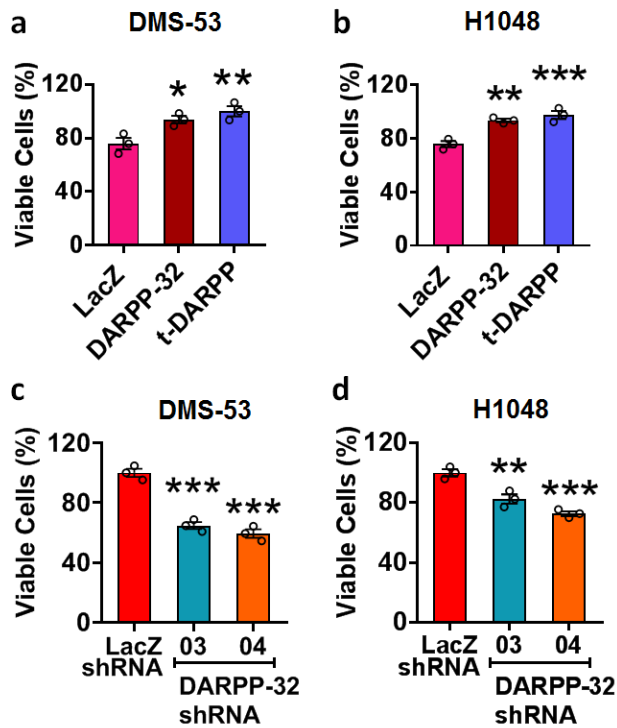

### Supplementary Figure 3: Overexpression of DARPP-32 isoforms increases SCLC cell viability.

**a-b** Human DMS-53 (a) and H1048 (b) cells transduced with control-, DARPP-32- or t-DARPP-overexpressing clones were plated into 96-well cell culture plates for 72h. MTS-1 reagents were used to quantify viable cells by measuring absorbance at 490 nm. **c-d** Colorimeter-based cell survival assays using MTS reagents were performed in DMS-53 (c) and H1048 (d) cells transduced with control shRNA or DARPP-32 shRNAs. Each open circle on a bar graph represents an independent experiment. Experiments were repeated three times. Error bars indicate SEM. \* $P < 0.05$ , \*\* $P < 0.01$ , and \*\*\* $P < 0.001$ , one-way ANOVA followed by Dunnett's test for multiple comparison.

Supplementary Figure 4

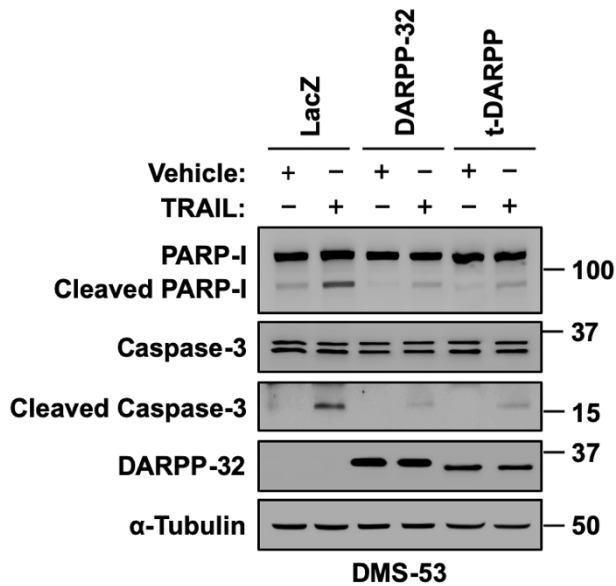

**Supplementary Figure 4: Overexpression of DARPP-32 isoforms protects cells from TRAIL-induced apoptosis.** Human SCLC DMS-53 cells transduced with retrovirus encoding LacZ (control), DARPP-32, and t-DARPP cDNA plasmids were treated with either vehicle (water) or TRAIL (250 nM) for 24h. Cells were lysed and immunoblotted with antibodies to detect cleaved and uncleaved PARP-I, cleaved and uncleaved (i.e., pro-) caspase-3, DARPP-32 and  $\alpha$ -tubulin (loading control). Experiments were performed three times. Results of one representative experiment were shown.

## Supplementary Figure 5

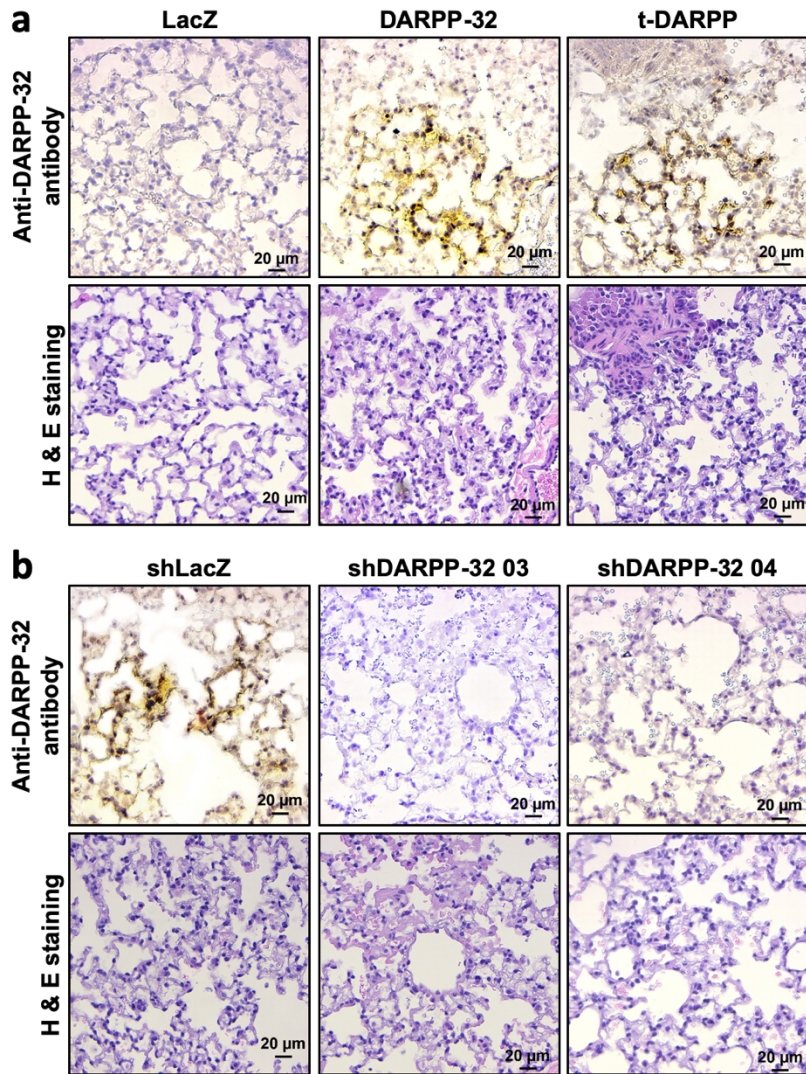

**Supplementary Figure 5: Verification of DARPP-32 and t-DARPP expression in explanted tumor xenografts.** **a** Human SCLC DMS-53 cells stably overexpress LacZ, DARPP-32, or t-DARPP proteins were orthotopically injected into SCID mice. The tumors were grown over the time in vivo and animals were sacrificed at the end of the experiment. Lung tissues harvested from mice were fixed in formaldehyde, embedded in paraffin, serially cross-sectioned, and subjected to immunohistochemistry (IHC) with an antibody that detects both DARPP-32 and t-DARPP protein. Nuclei and cytosol were stained with hematoxylin and eosin (H & E), respectively. **b** DARPP-32-ablated DMS-53 cells were orthotopically injected into SCID mice and explanted tumors were subjected to IHC using anti-DARPP-32 antibody. H & E staining were performed to visualize tissue morphology. Scale bar indicates 20 μm. IHC experiments were repeated in three mice lung tissues from each group. Results represent one single experiment.

## Supplementary Figure 6

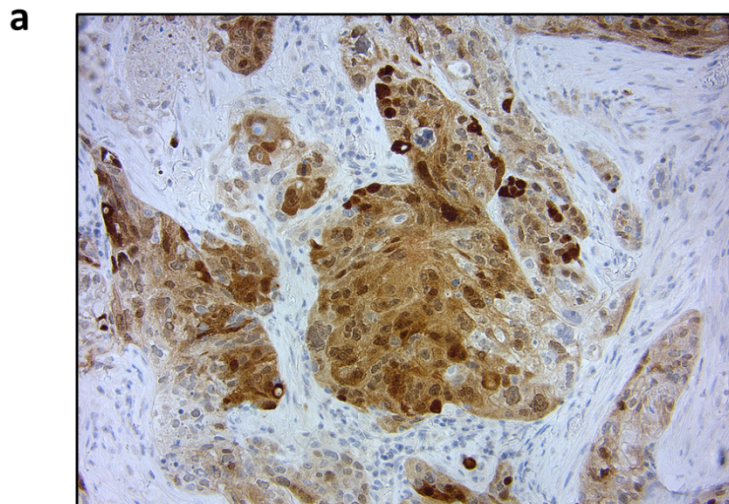

**Positive Staining**

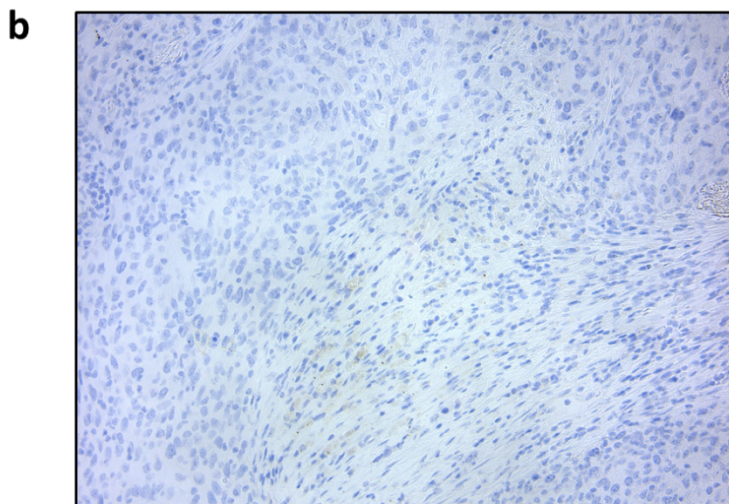

**Negative Staining**

**Supplementary Figure 6: Antibody specificity controls for DARPP-32 antibody used in the IHC studies.** **a.** IHC was performed using a C-terminal DARPP-32 antibody that detects both DARPP-32 and t-DARPP (i.e. positive staining) and **b.** no primary antibody (i.e. negative staining). Serial sections of the same reference human SCLC tissues were used for antibody specificity controls shown in this figure.



## Supplementary Figure 7

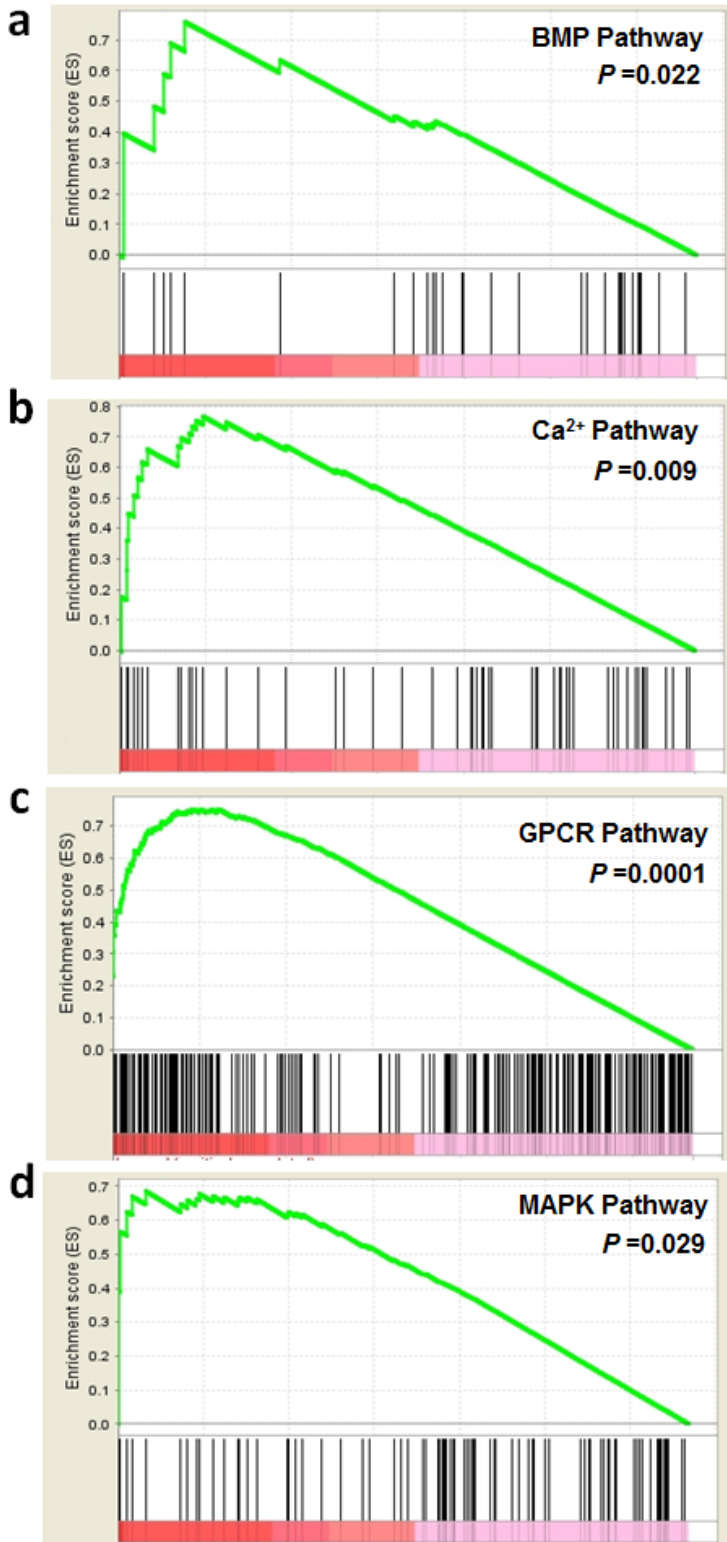

**Supplementary Figure 7: Gene set enrichment analysis (GSEA).** **a** Bone morphogenetic protein (BMP) pathway, **b** Calcium signaling (Ca<sup>2+</sup>) pathway, **c** G protein coupled receptor (GPCR) pathway and **d** mitogen-activated protein kinase (MAPK) pathway were shown to be enriched in a subset of SCLC patients with elevated t-DARPP levels in tumor tissue by performing GSEA.



## Supplementary Figure 8

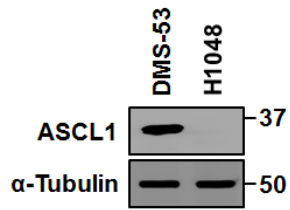

**Supplementary Figure 8: ASCL1 is upregulated in DMS-53 cells.** Two human SCLC cell lines, namely DMS-53 and H1048, were lysed and immunoblotted with antibodies against ASCL1 and  $\alpha$ -tubulin (loading control).

**Supplementary Table 1: List of primers used in this study**

Primers used in site-directed mutagenesis

| Name        | Forward Primer (5'-3')                                             | Reverse Primer (5'-3')                                         |
|-------------|--------------------------------------------------------------------|----------------------------------------------------------------|
| ASCL1-SDM01 | GGAGGCTTCTCTGCCCTCATCTCCCTTCTACTGATCCCCAGCCTGGGATC                 | GATCCCAGGCTGGGGATCAGTAGAAGGGAGATGAGGGCAGAGAAGCCTCC             |
| ASCL1-SDM02 | ATAAGCCCTCCTGCTCAAATGGGGCTACTGATCCATGTTCCCTGAGGCCTTTTC             | GAAAAGGCCTCAGGGAACATGGATCAGTAGCCCCATTTGAGCAGGAGGGCTTAT         |
| ASCL1-SDM03 | CCTACACCCCTGGGCCAACAACTTATCATCACTGATTTTCCCAACAAGTATATAAGTCAACAAACA | TGTTTGTGACTTATATACTTGTGGGAAAATCAGTGATGATAAGTTGTGGCCAGGGGTGTAGG |

Primers used in sanger sequencing

| Name              | Forward Primer (5'-3') | Reverse Primer (5'-3') |
|-------------------|------------------------|------------------------|
| DARPP-32 promoter | CCTCTGTCAGCCAGTCTTCC   | TCTTCTGGAATTGGGGTCAG   |

**Supplementary Table 2: Immunostaining scores of patient-derived human SCLC tissue samples**

| <b>SCLC Patient No.</b> | <b>Figure No.</b> | <b>DARPP-32+ cells (%)</b> | <b>Intensity</b> | <b>IHC score</b> |
|-------------------------|-------------------|----------------------------|------------------|------------------|
| 1                       | 4G                | 95                         | 3                | 285              |
| 2                       | 4H                | 30                         | 3                | 90               |
| 3                       | 4I                | 10                         | 3                | 30               |
| 4                       | 4J                | 80                         | 3                | 240              |
| 5                       | 4K                | >90                        | 3                | >270             |
| 6                       | 4L                | 90                         | 3                | 270              |

**Supplementary Table 3: List of upregulated genes with fold change relative to normal**

| <b>Gene Name</b>      | <b>Fold change relative to normal</b> |
|-----------------------|---------------------------------------|
| <i>OR51E1</i>         | 711.6                                 |
| <i>AMER3</i>          | 283.8                                 |
| <i>FEZF2</i>          | 261.8                                 |
| <i>FGF5</i>           | 250.1                                 |
| <i>AC005307.3</i>     | 229.3                                 |
| <i>ELAVL2</i>         | 229.1                                 |
| <i>CALCA</i>          | 229.0                                 |
| <i>AC005307.1</i>     | 182.8                                 |
| <i>GABRG3</i>         | 170.6                                 |
| <i>DLX6-AS1</i>       | 163.6                                 |
| <i>C18orf42</i>       | 145.0                                 |
| <i>GFY</i>            | 137.4                                 |
| <i>RP11-51M18.1</i>   | 128.2                                 |
| <i>SIM1</i>           | 125.3                                 |
| <i>RP11-669N7.2</i>   | 122.6                                 |
| <i>KLK12</i>          | 122.1                                 |
| <i>EMX2OS</i>         | 121.7                                 |
| <i>STMN2</i>          | 118.7                                 |
| <i>MARCH11</i>        | 117.4                                 |
| <i>CACNG5</i>         | 114.3                                 |
| <i>MIR519A2</i>       | 111.7                                 |
| <i>RP11-277I20.3</i>  | 109.5                                 |
| <i>BRS3</i>           | 108.0                                 |
| <i>RP11-139K4.2</i>   | 104.6                                 |
| <i>RP11-665C14.2</i>  | 102.5                                 |
| <i>TBXT</i>           | 101.6                                 |
| <i>GAD2</i>           | 94.4                                  |
| <i>RP11-438B23.2</i>  | 91.2                                  |
| <i>ATP2B3</i>         | 88.5                                  |
| <i>LCN15</i>          | 88.2                                  |
| <i>IL1RAPL2</i>       | 81.8                                  |
| <i>CNTNAP2</i>        | 80.2                                  |
| <i>TUNAR</i>          | 79.9                                  |
| <i>KCNH5</i>          | 79.6                                  |
| <i>LRRC53</i>         | 79.0                                  |
| <i>SYT4</i>           | 75.5                                  |
| <i>CGA</i>            | 71.9                                  |
| <i>RP11-1038A11.2</i> | 70.5                                  |
| <i>GABRG2</i>         | 69.3                                  |
| <i>GRIK3</i>          | 69.1                                  |
| <i>TPH1</i>           | 67.9                                  |
| <i>CTNNA2</i>         | 67.0                                  |
| <i>CASC18</i>         | 66.5                                  |
| <i>EMX1</i>           | 66.0                                  |
| <i>CPA5</i>           | 65.5                                  |
| <i>RP11-52L5.6</i>    | 65.2                                  |
| <i>FUT9</i>           | 64.8                                  |
| <i>PDX1</i>           | 63.7                                  |
| <i>CER1</i>           | 63.6                                  |

| <b>Gene Name</b>     | <b>Fold change relative to normal</b> |
|----------------------|---------------------------------------|
| <i>RP11-64C1.1</i>   | 63.2                                  |
| <i>LRTM2</i>         | 62.3                                  |
| <i>EPHA6</i>         | 61.6                                  |
| <i>MAGEA9</i>        | 61.4                                  |
| <i>GABRQ</i>         | 61.1                                  |
| <i>HMGB3P18</i>      | 59.5                                  |
| <i>CNTN2</i>         | 58.6                                  |
| <i>LINC01249</i>     | 57.6                                  |
| <i>MAGEC1</i>        | 57.4                                  |
| <i>NKX2-2</i>        | 57.4                                  |
| <i>SOX1</i>          | 56.8                                  |
| <i>KCNH6</i>         | 56.2                                  |
| <i>RP11-474D1.3</i>  | 56.0                                  |
| <i>DLX5</i>          | 55.7                                  |
| <i>ATOH7</i>         | 55.0                                  |
| <i>HAPLN1</i>        | 54.6                                  |
| <i>SLC24A2</i>       | 54.6                                  |
| <i>RP5-984P4.6</i>   | 54.4                                  |
| <i>SYT6</i>          | 54.3                                  |
| <i>SLITRK1</i>       | 53.4                                  |
| <i>RET</i>           | 52.8                                  |
| <i>POU3F2</i>        | 52.3                                  |
| <i>CTD-2140G10.2</i> | 52.2                                  |
| <i>BARHL2</i>        | 51.7                                  |
| <i>LINC00626</i>     | 51.3                                  |
| <i>LINC00002</i>     | 51.0                                  |
| <i>PEX5L</i>         | 50.8                                  |
| <i>FGF12-AS2</i>     | 50.3                                  |
| <i>KCNB2</i>         | 50.2                                  |
| <i>RNF186</i>        | 49.8                                  |
| <i>SLC18A1</i>       | 49.5                                  |
| <i>PCSK1</i>         | 49.4                                  |
| <i>NELL1</i>         | 49.4                                  |
| <i>ADCY2</i>         | 49.3                                  |
| <i>RP11-317N12.1</i> | 48.7                                  |
| <i>RP11-1C8.4</i>    | 48.6                                  |
| <i>TEX101</i>        | 48.6                                  |
| <i>AC012506.2</i>    | 48.6                                  |
| <i>TACR3</i>         | 48.2                                  |
| <i>DLX6</i>          | 48.1                                  |
| <i>ZMAT4</i>         | 48.1                                  |
| <i>CPLX2</i>         | 47.4                                  |
| <i>VEGF</i>          | 47.3                                  |
| <i>GLYATL3</i>       | 47.1                                  |
| <i>ASCL1</i>         | 47.0                                  |
| <i>FLJ36000</i>      | 45.8                                  |
| <i>STXBP5L</i>       | 45.7                                  |
| <i>RP1-212P9.2</i>   | 45.6                                  |
| <i>GRP</i>           | 45.6                                  |
| <i>NXPH1</i>         | 45.6                                  |
| <i>FOXD3</i>         | 45.5                                  |

| <b>Gene Name</b>     | <b>Fold change relative to normal</b> |
|----------------------|---------------------------------------|
| <i>CACNA1E</i>       | 45.0                                  |
| <i>POU4F1</i>        | 44.7                                  |
| <i>RAX</i>           | 44.6                                  |
| <i>RP11-48F14.2</i>  | 44.6                                  |
| <i>TEX15</i>         | 44.2                                  |
| <i>FOXD3-AS1</i>     | 44.2                                  |
| <i>IGFBPL1</i>       | 44.0                                  |
| <i>KCNC2</i>         | 43.9                                  |
| <i>RP11-277I20.2</i> | 43.6                                  |
| <i>ZIC2</i>          | 43.5                                  |
| <i>CALCB</i>         | 43.4                                  |
| <i>HOXC13</i>        | 43.4                                  |
| <i>CHGA</i>          | 43.3                                  |
| <i>PNMA6D</i>        | 43.2                                  |
| <i>NCAN</i>          | 42.9                                  |
| <i>NEUROG3</i>       | 42.8                                  |
| <i>SORCS3</i>        | 42.7                                  |
| <i>KIRREL3</i>       | 42.6                                  |
| <i>SELV</i>          | 42.5                                  |
| <i>PTH2</i>          | 42.4                                  |
| <i>NAT16</i>         | 42.2                                  |
| <i>ZIC5</i>          | 41.7                                  |
| <i>SYT14</i>         | 41.7                                  |
| <i>ONECUT2</i>       | 41.5                                  |
| <i>KRT83</i>         | 41.0                                  |
| <i>RP11-114G22.1</i> | 41.0                                  |
| <i>CTD-2566J3.1</i>  | 40.5                                  |
| <i>AC079466.1</i>    | 40.5                                  |
| <i>MARCH4</i>        | 40.2                                  |
| <i>CTD-2089N3.1</i>  | 40.0                                  |
| <i>RP11-300M24.1</i> | 39.9                                  |
| <i>RP11-328N19.1</i> | 39.8                                  |
| <i>PTF1A</i>         | 39.8                                  |
| <i>RP11-501O2.5</i>  | 39.8                                  |
| <i>LMO1</i>          | 39.7                                  |
| <i>TRH</i>           | 39.5                                  |
| <i>SPAG11B</i>       | 38.9                                  |
| <i>ACBD7</i>         | 38.4                                  |
| <i>CADPS</i>         | 38.4                                  |
| <i>RP11-81H3.2</i>   | 38.0                                  |
| <i>MYO3A</i>         | 38.0                                  |
| <i>OTOG</i>          | 37.9                                  |
| <i>FOXL2</i>         | 37.8                                  |
| <i>GNG8</i>          | 37.8                                  |
| <i>TBX20</i>         | 37.8                                  |
| <i>TMEM145</i>       | 37.8                                  |
| <i>ZBTB8B</i>        | 37.6                                  |
| <i>RTBDN</i>         | 37.5                                  |
| <i>RP11-675F6.3</i>  | 37.5                                  |
| <i>RP11-13A1.1</i>   | 37.3                                  |
| <i>TPSP2</i>         | 37.1                                  |

| <b>Gene Name</b>      | <b>Fold change relative to normal</b> |
|-----------------------|---------------------------------------|
| <i>AL109763.2</i>     | 36.8                                  |
| <i>DLK1</i>           | 36.7                                  |
| <i>ACTL6B</i>         | 36.6                                  |
| <i>UMODL1</i>         | 36.6                                  |
| <i>SP8</i>            | 36.6                                  |
| <i>SCN3A</i>          | 36.6                                  |
| <i>FAM132B</i>        | 36.0                                  |
| <i>BEST3</i>          | 35.8                                  |
| <i>OPRD1</i>          | 35.7                                  |
| <i>CST1</i>           | 35.6                                  |
| <i>NLRP11</i>         | 35.5                                  |
| <i>KCNK2</i>          | 35.3                                  |
| <i>OLFM3</i>          | 35.2                                  |
| <i>LINC00404</i>      | 35.2                                  |
| <i>ATP4B</i>          | 35.1                                  |
| <i>CHRNA2</i>         | 34.9                                  |
| <i>NEUROD1</i>        | 34.9                                  |
| <i>DCX</i>            | 34.8                                  |
| <i>GPR6</i>           | 34.5                                  |
| <i>PRKCG</i>          | 34.5                                  |
| <i>LINC00461</i>      | 34.5                                  |
| <i>LL22NC03-121E8</i> | 34.5                                  |
| <i>RP11-1C8.7</i>     | 34.2                                  |
| <i>SHOX2</i>          | 34.0                                  |
| <i>ST8SIA5</i>        | 34.0                                  |
| <i>DLX1</i>           | 34.0                                  |
| <i>CASC20</i>         | 34.0                                  |
| <i>RP11-153K16.1</i>  | 33.7                                  |
| <i>DLX2</i>           | 33.5                                  |
| <i>SVOP</i>           | 33.5                                  |
| <i>CTD-2147F2.1</i>   | 33.4                                  |
| <i>SOWAHA</i>         | 33.4                                  |
| <i>PAQR9</i>          | 33.3                                  |
| <i>NPC1L1</i>         | 33.3                                  |
| <i>RP11-13K12.2</i>   | 33.2                                  |
| <i>LINC00669</i>      | 33.2                                  |
| <i>ISL1</i>           | 33.1                                  |
| <i>ATCAY</i>          | 33.1                                  |
| <i>SEZ6L</i>          | 33.0                                  |
| <i>DCAF12L2</i>       | 33.0                                  |
| <i>RP11-742D12.2</i>  | 32.9                                  |
| <i>PHYHIPL</i>        | 32.9                                  |
| <i>BRINP2</i>         | 32.8                                  |
| <i>RP11-1103G16.1</i> | 32.8                                  |
| <i>CLVS2</i>          | 32.7                                  |
| <i>AC012123.1</i>     | 32.6                                  |
| <i>RP11-316M20.1</i>  | 32.6                                  |
| <i>KCNC1</i>          | 32.5                                  |
| <i>DLL3</i>           | 32.3                                  |
| <i>SCG3</i>           | 32.3                                  |
| <i>HTR1E</i>          | 32.2                                  |



| <b>Gene Name</b>     | <b>Fold change relative to normal</b> |
|----------------------|---------------------------------------|
| <i>TMEM74</i>        | 32.0                                  |
| <i>VIL1</i>          | 32.0                                  |
| <i>OPCML</i>         | 32.0                                  |
| <i>GNG4</i>          | 32.0                                  |
| <i>LINGO2</i>        | 31.9                                  |
| <i>TCERG1L</i>       | 31.7                                  |
| <i>TMEM132B</i>      | 31.7                                  |
| <i>BARX1-AS1</i>     | 31.7                                  |
| <i>PCDHGC4</i>       | 31.7                                  |
| <i>PCDH8</i>         | 31.5                                  |
| <i>GRIN2C</i>        | 31.4                                  |
| <i>RP11-429B14.4</i> | 31.4                                  |
| <i>RP11-30L8.1</i>   | 31.4                                  |
| <i>KCNH7</i>         | 31.3                                  |
| <i>HIST1H3J</i>      | 31.2                                  |
| <i>GJD2</i>          | 31.1                                  |
| <i>PTPRN</i>         | 31.1                                  |
| <i>AF131216.5</i>    | 30.9                                  |
| <i>AC113607.2</i>    | 30.9                                  |
| <i>RAB3B</i>         | 30.9                                  |
| <i>CEND1</i>         | 30.8                                  |
| <i>PCDHA5</i>        | 30.7                                  |
| <i>TRIM67</i>        | 30.6                                  |
| <i>FAM163B</i>       | 30.6                                  |
| <i>CHRNA4</i>        | 30.6                                  |
| <i>KLHL1</i>         | 30.6                                  |
| <i>RALYL</i>         | 30.5                                  |
| <i>WNT16</i>         | 30.5                                  |
| <i>MUC13</i>         | 30.5                                  |
| <i>NRSN1</i>         | 30.3                                  |
| <i>LINC00592</i>     | 30.3                                  |
| <i>GNG13</i>         | 30.3                                  |
| <i>FOXP3</i>         | 30.1                                  |
| <i>AC012354.6</i>    | 30.1                                  |
| <i>SLC25A48</i>      | 30.1                                  |
| <i>RP13-786C16.1</i> | 30.0                                  |
| <i>RP11-675F6.4</i>  | 30.0                                  |
| <i>GABBR2</i>        | 30.0                                  |
| <i>HOXA13</i>        | 30.0                                  |
| <i>RIMS2</i>         | 29.8                                  |
| <i>CYP4F23P</i>      | 29.7                                  |
| <i>BSND</i>          | 29.7                                  |
| <i>DNER</i>          | 29.7                                  |
| <i>FRRS1L</i>        | 29.6                                  |
| <i>SSTR2</i>         | 29.5                                  |
| <i>SYT13</i>         | 29.5                                  |
| <i>DRD2</i>          | 29.5                                  |
| <i>LINC00403</i>     | 29.4                                  |
| <i>B3GALT5</i>       | 29.4                                  |
| <i>ATRNL1</i>        | 29.4                                  |
| <i>CNPY1</i>         | 29.2                                  |

| <b>Gene Name</b>      | <b>Fold change relative to normal</b> |
|-----------------------|---------------------------------------|
| <i>DAPL1</i>          | 29.2                                  |
| <i>AC009410.1</i>     | 29.2                                  |
| <i>INA</i>            | 29.1                                  |
| <i>NDST4</i>          | 29.0                                  |
| <i>SLC7A14</i>        | 28.9                                  |
| <i>C8orf12</i>        | 28.8                                  |
| <i>CAMK2B</i>         | 28.8                                  |
| <i>CTD-2314G24.2</i>  | 28.7                                  |
| <i>SLC6A15</i>        | 28.7                                  |
| <i>ZDHHC22</i>        | 28.7                                  |
| <i>C21orf88</i>       | 28.6                                  |
| <i>RP11-85O21.2</i>   | 28.6                                  |
| <i>LYPD1</i>          | 28.5                                  |
| <i>SLC6A17</i>        | 28.3                                  |
| <i>C1QL4</i>          | 28.3                                  |
| <i>RP11-1070N10.5</i> | 28.3                                  |
| <i>CDK5R2</i>         | 28.2                                  |
| <i>RP13-714J12.1</i>  | 28.1                                  |
| <i>COX6B2</i>         | 28.1                                  |
| <i>RP11-78L16.1</i>   | 28.1                                  |
| <i>TRDN</i>           | 28.0                                  |
| <i>LMX1B</i>          | 27.9                                  |
| <i>HOXB8</i>          | 27.8                                  |
| <i>XKR7</i>           | 27.7                                  |
| <i>HOXB9</i>          | 27.6                                  |
| <i>CTD-2203A3.1</i>   | 27.6                                  |
| <i>RP11-398J5.1</i>   | 27.4                                  |
| <i>RP11-87G24.6</i>   | 27.4                                  |
| <i>GCK</i>            | 27.3                                  |
| <i>MUC19</i>          | 27.3                                  |
| <i>RP11-138J23.1</i>  | 27.2                                  |
| <i>RP4-738P15.1</i>   | 27.1                                  |
| <i>CTB-49A3.4</i>     | 27.1                                  |
| <i>RP11-143K11.1</i>  | 27.1                                  |
| <i>ONECUT1</i>        | 26.9                                  |
| <i>KIF4B</i>          | 26.9                                  |
| <i>SIX3-AS1</i>       | 26.9                                  |
| <i>RP11-423G4.7</i>   | 26.9                                  |
| <i>NGB</i>            | 26.8                                  |
| <i>SLC35D3</i>        | 26.8                                  |
| <i>KLK2</i>           | 26.7                                  |
| <i>ELOVL2</i>         | 26.6                                  |
| <i>ENTPD8</i>         | 26.6                                  |
| <i>TRPM5</i>          | 26.5                                  |
| <i>FOXN4</i>          | 26.5                                  |
| <i>ATP4A</i>          | 26.5                                  |
| <i>ELAVL4</i>         | 26.4                                  |
| <i>CALML3-AS1</i>     | 26.3                                  |
| <i>TAAR1</i>          | 26.3                                  |
| <i>SHANK2-AS3</i>     | 26.3                                  |
| <i>IGFL4</i>          | 26.3                                  |

| <b>Gene Name</b>     | <b>Fold change relative to normal</b> |
|----------------------|---------------------------------------|
| <i>RGS7</i>          | 26.2                                  |
| <i>AF064860.7</i>    | 26.2                                  |
| <i>CTD-2021H9.3</i>  | 26.1                                  |
| <i>CNTNAP5</i>       | 26.1                                  |
| <i>RP11-89K21.1</i>  | 26.1                                  |
| <i>RP11-844P9.2</i>  | 26.0                                  |
| <i>CRYBA2</i>        | 26.0                                  |
| <i>RP11-445F12.1</i> | 25.9                                  |
| <i>CABP7</i>         | 25.9                                  |
| <i>CAMKV</i>         | 25.8                                  |
| <i>RUNDC3A</i>       | 25.7                                  |
| <i>HMGB3P13</i>      | 25.7                                  |
| <i>DPYSL5</i>        | 25.7                                  |
| <i>KCNK10</i>        | 25.7                                  |
| <i>SEZ6</i>          | 25.6                                  |
| <i>LINC00491</i>     | 25.6                                  |
| <i>RP11-389G6.3</i>  | 25.4                                  |
| <i>CACNA1A</i>       | 25.3                                  |
| <i>GHRH</i>          | 25.3                                  |
| <i>TUSC8</i>         | 25.2                                  |
| <i>BEX1</i>          | 25.2                                  |
| <i>RP11-531A24.3</i> | 25.1                                  |
| <i>AC069277.2</i>    | 25.1                                  |
| <i>RP11-60A24.3</i>  | 25.1                                  |
| <i>HIST1H2BH</i>     | 25.1                                  |
| <i>TMSB15A</i>       | 25.1                                  |
| <i>INSM1</i>         | 25.1                                  |
| <i>KIF4A</i>         | 25.0                                  |
| <i>TMSB15A</i>       | 24.9                                  |
| <i>CTD-2292M14.1</i> | 24.9                                  |
| <i>RP11-478J18.2</i> | 24.9                                  |
| <i>COL22A1</i>       | 24.9                                  |
| <i>C11orf87</i>      | 24.9                                  |
| <i>FLRT1</i>         | 24.8                                  |
| <i>MAGEC2</i>        | 24.8                                  |
| <i>ZAN</i>           | 24.7                                  |
| <i>KCNK9</i>         | 24.7                                  |
| <i>KIF1A</i>         | 24.6                                  |
| <i>CALB1</i>         | 24.6                                  |
| <i>LINC00355</i>     | 24.6                                  |
| <i>EPHA7</i>         | 24.5                                  |
| <i>SCRT2</i>         | 24.5                                  |
| <i>RP3-410B11.1</i>  | 24.5                                  |
| <i>MTUS2-AS1</i>     | 24.4                                  |
| <i>RP11-19O2.2</i>   | 24.4                                  |
| <i>SMOC1</i>         | 24.4                                  |
| <i>AC013733.3</i>    | 24.4                                  |
| <i>C19orf45</i>      | 24.3                                  |
| <i>ST18</i>          | 24.3                                  |
| <i>SUCNR1</i>        | 24.3                                  |
| <i>EPHB1</i>         | 24.3                                  |

| <b>Gene Name</b>     | <b>Fold change relative to normal</b> |
|----------------------|---------------------------------------|
| <i>E2F7</i>          | 24.2                                  |
| <i>HOXC-AS2</i>      | 24.2                                  |
| <i>GAD1</i>          | 24.2                                  |
| <i>NPPB</i>          | 24.2                                  |
| <i>OXT</i>           | 24.1                                  |
| <i>NKX2-5</i>        | 24.1                                  |
| <i>FEZF1-AS1</i>     | 24.0                                  |
| <i>SYT5</i>          | 23.9                                  |
| <i>DGKB</i>          | 23.9                                  |
| <i>NRXN1</i>         | 23.8                                  |
| <i>CALY</i>          | 23.8                                  |
| <i>ZYG11A</i>        | 23.8                                  |
| <i>TRPM8</i>         | 23.7                                  |
| <i>FSTL5</i>         | 23.6                                  |
| <i>ASXL3</i>         | 23.6                                  |
| <i>MSI1</i>          | 23.6                                  |
| <i>BTBD17</i>        | 23.5                                  |
| <i>KIF5C</i>         | 23.5                                  |
| <i>KCNJ6</i>         | 23.3                                  |
| <i>CLSTN2</i>        | 23.3                                  |
| <i>AGMO</i>          | 23.3                                  |
| <i>FOXE1</i>         | 23.2                                  |
| <i>RPRML</i>         | 23.2                                  |
| <i>MIR770</i>        | 23.2                                  |
| <i>SYT1</i>          | 23.2                                  |
| <i>NKAIN2</i>        | 23.2                                  |
| <i>BEST2</i>         | 23.1                                  |
| <i>GABRR1</i>        | 23.1                                  |
| <i>PRLHR</i>         | 23.1                                  |
| <i>RP11-8L2.1</i>    | 23.1                                  |
| <i>SCGB1D2</i>       | 23.1                                  |
| <i>MMP12</i>         | 23.1                                  |
| <i>CTD-2006C1.6</i>  | 23.1                                  |
| <i>PCP4</i>          | 23.1                                  |
| <i>LINC01096</i>     | 23.1                                  |
| <i>CRABP1</i>        | 23.0                                  |
| <i>SOX2-OT</i>       | 23.0                                  |
| <i>CTB-107G13.1</i>  | 23.0                                  |
| <i>TAF7L</i>         | 23.0                                  |
| <i>DMBX1</i>         | 22.9                                  |
| <i>AC144833.1</i>    | 22.9                                  |
| <i>PENK</i>          | 22.8                                  |
| <i>MELK</i>          | 22.8                                  |
| <i>RP13-766D20.4</i> | 22.8                                  |
| <i>SLC38A3</i>       | 22.7                                  |
| <i>ELOVL4</i>        | 22.6                                  |
| <i>RP11-734K21.5</i> | 22.5                                  |
| <i>LA16c-329F2.1</i> | 22.5                                  |
| <i>PAX1</i>          | 22.5                                  |
| <i>RGS17</i>         | 22.5                                  |
| <i>LINC00237</i>     | 22.3                                  |

| <b>Gene Name</b>     | <b>Fold change relative to normal</b> |
|----------------------|---------------------------------------|
| <i>RP5-1063M23.2</i> | 22.3                                  |
| <i>AOC1</i>          | 22.3                                  |
| <i>DAND5</i>         | 22.3                                  |
| <i>HEPACAM2</i>      | 22.3                                  |
| <i>TRIM9</i>         | 22.3                                  |
| <i>NPPA</i>          | 22.2                                  |
| <i>NCAM1</i>         | 22.2                                  |
| <i>SPOCK3</i>        | 22.2                                  |
| <i>RP11-424C20.2</i> | 22.2                                  |
| <i>PASD1</i>         | 22.2                                  |
| <i>DEPDC1</i>        | 22.2                                  |
| <i>MIR7-3HG</i>      | 22.1                                  |
| <i>BRSK2</i>         | 22.1                                  |
| <i>ATP1A3</i>        | 22.0                                  |
| <i>LRFN2</i>         | 22.0                                  |
| <i>GLYATL1</i>       | 21.9                                  |
| <i>GLDC</i>          | 21.9                                  |
| <i>TAGLN3</i>        | 21.9                                  |
| <i>ZNF488</i>        | 21.9                                  |
| <i>DPYSL4</i>        | 21.9                                  |
| <i>DBX1</i>          | 21.9                                  |
| <i>SHISA7</i>        | 21.8                                  |
| <i>SCN8A</i>         | 21.7                                  |
| <i>RIPPLY2</i>       | 21.7                                  |
| <i>LINC01143</i>     | 21.7                                  |
| <i>CHGB</i>          | 21.6                                  |
| <i>HOXD10</i>        | 21.6                                  |
| <i>RP11-57G22.1</i>  | 21.5                                  |
| <i>BIRC5</i>         | 21.5                                  |
| <i>FAM64A</i>        | 21.5                                  |
| <i>RP11-120K24.5</i> | 21.5                                  |
| <i>ZNF695</i>        | 21.5                                  |
| <i>KCNMB2</i>        | 21.4                                  |
| <i>UNC79</i>         | 21.4                                  |
| <i>UCHL1</i>         | 21.4                                  |
| <i>FOXB1</i>         | 21.4                                  |
| <i>TCEAL5</i>        | 21.3                                  |
| <i>HOXD11</i>        | 21.3                                  |
| <i>CH17-38B12.2</i>  | 21.3                                  |
| <i>BBOX1-AS1</i>     | 21.3                                  |
| <i>RP11-713C5.1</i>  | 21.3                                  |
| <i>RP11-3B12.5</i>   | 21.2                                  |
| <i>INSRR</i>         | 21.2                                  |
| <i>NUF2</i>          | 21.2                                  |
| <i>LRRC14B</i>       | 21.1                                  |
| <i>GRM4</i>          | 21.1                                  |
| <i>LIN28A</i>        | 21.1                                  |
| <i>UNC80</i>         | 21.1                                  |
| <i>LINC00381</i>     | 21.1                                  |
| <i>ELAVL3</i>        | 21.1                                  |
| <i>RP11-629G13.1</i> | 21.0                                  |

| <b>Gene Name</b> | <b>Fold change relative to normal</b> |
|------------------|---------------------------------------|
| AC010975.1       | 21.0                                  |
| OGDHL            | 21.0                                  |
| ASPM             | 21.0                                  |
| LINC00466        | 20.9                                  |
| ENTPD2           | 20.9                                  |
| RP11-227D2.3     | 20.9                                  |
| SIX2             | 20.9                                  |
| RP11-353N14.1    | 20.9                                  |
| POU6F2-AS2       | 20.8                                  |
| AP000251.3       | 20.8                                  |
| ALX4             | 20.8                                  |
| RAET1K           | 20.8                                  |
| ELOVL2-AS1       | 20.8                                  |
| RP11-527D7.1     | 20.7                                  |
| SPSB4            | 20.7                                  |
| LINC00928        | 20.7                                  |
| LINC00648        | 20.7                                  |
| KCNA1            | 20.6                                  |
| CDH2             | 20.6                                  |
| CTD-2320G14.2    | 20.6                                  |
| HIST1H2AL        | 20.6                                  |
| FAM111B          | 20.5                                  |
| FEV              | 20.4                                  |
| RP11-357K6.1     | 20.4                                  |
| CLSPN            | 20.4                                  |
| DPP10            | 20.4                                  |
| AMH              | 20.4                                  |
| RPS11P6          | 20.3                                  |
| C12orf56         | 20.2                                  |
| KLK3             | 20.2                                  |
| RP11-438D14.2    | 20.2                                  |
| C1orf95          | 20.1                                  |
| INHBE            | 20.0                                  |
| SNAI1P1          | 20.0                                  |
| GPR144           | 20.0                                  |
| DLGAP5           | 19.9                                  |
| RP11-96H17.1     | 19.8                                  |
| DRAXIN           | 19.8                                  |
| SLC12A1          | 19.8                                  |
| RP11-551L14.1    | 19.8                                  |
| L1CAM            | 19.8                                  |
| LHX2             | 19.8                                  |
| C6orf183         | 19.7                                  |
| ST8SIA3          | 19.7                                  |
| OTOP3            | 19.7                                  |
| PPM1E            | 19.7                                  |
| RP5-984P4.4      | 19.7                                  |
| UNC5A            | 19.7                                  |
| RP11-1038A11.3   | 19.6                                  |
| CNTD2            | 19.6                                  |
| SOX2             | 19.6                                  |

| <b>Gene Name</b>     | <b>Fold change relative to normal</b> |
|----------------------|---------------------------------------|
| <i>RP11-883G14.1</i> | 19.5                                  |
| <i>GRM2</i>          | 19.5                                  |
| <i>RPL32P33</i>      | 19.4                                  |
| <i>RP5-823G15.5</i>  | 19.4                                  |
| <i>RIMBP2</i>        | 19.4                                  |
| <i>SPOCK1</i>        | 19.4                                  |
| <i>RP11-728G15.1</i> | 19.4                                  |
| <i>NPTX2</i>         | 19.4                                  |
| <i>RP11-117L6.1</i>  | 19.3                                  |
| <i>RP11-74E22.8</i>  | 19.3                                  |
| <i>DGCR9</i>         | 19.3                                  |
| <i>RP11-385J1.2</i>  | 19.3                                  |
| <i>CTD-2377D24.4</i> | 19.3                                  |
| <i>RP11-494H4.3</i>  | 19.3                                  |
| <i>MNX1-AS1</i>      | 19.2                                  |
| <i>RP11-397A16.1</i> | 19.2                                  |
| <i>SOX11</i>         | 19.2                                  |
| <i>PROX1-AS1</i>     | 19.2                                  |
| <i>MEX3A</i>         | 19.2                                  |
| <i>C1QL1</i>         | 19.1                                  |
| <i>RP11-108E14.1</i> | 19.1                                  |
| <i>RGS4</i>          | 19.0                                  |
| <i>AP3B2</i>         | 19.0                                  |
| <i>SSTR5-AS1</i>     | 19.0                                  |
| <i>RP11-15G16.1</i>  | 19.0                                  |
| <i>SYT10</i>         | 19.0                                  |
| <i>RCOR2</i>         | 19.0                                  |
| <i>TUBB2B</i>        | 18.9                                  |
| <i>NMNAT2</i>        | 18.9                                  |
| <i>RP11-74E22.4</i>  | 18.9                                  |
| <i>HP09025</i>       | 18.9                                  |
| <i>SLC5A12</i>       | 18.8                                  |
| <i>TPH2</i>          | 18.8                                  |
| <i>PAH</i>           | 18.8                                  |
| <i>CCDC177</i>       | 18.8                                  |
| <i>SCGN</i>          | 18.7                                  |
| <i>CLGN</i>          | 18.7                                  |
| <i>CDKN2A</i>        | 18.7                                  |
| <i>RAD54L</i>        | 18.7                                  |
| <i>PAX4</i>          | 18.7                                  |
| <i>BAI2</i>          | 18.7                                  |
| <i>AC108676.1</i>    | 18.7                                  |
| <i>SV2A</i>          | 18.6                                  |
| <i>AC007128.1</i>    | 18.6                                  |
| <i>TOP2A</i>         | 18.6                                  |
| <i>HIST1H1B</i>      | 18.6                                  |
| <i>PROX1</i>         | 18.6                                  |
| <i>GPR139</i>        | 18.6                                  |
| <i>ALG1L3P</i>       | 18.5                                  |
| <i>RP11-561B11.6</i> | 18.5                                  |
| <i>ADCYAP1</i>       | 18.5                                  |



| <b>Gene Name</b> | <b>Fold change relative to normal</b> |
|------------------|---------------------------------------|
| AC116614.1       | 18.5                                  |
| FAM155B          | 18.4                                  |
| HNF4G            | 18.4                                  |
| HERC2P10         | 18.4                                  |
| RP11-142C4.4     | 18.4                                  |
| RP11-431M3.1     | 18.3                                  |
| LL09NC01-254D1   | 18.3                                  |
| CELF4            | 18.3                                  |
| SALL1            | 18.3                                  |
| NXPH4            | 18.3                                  |
| DLGAP3           | 18.3                                  |
| GDAP1L1          | 18.3                                  |
| ASNAP3           | 18.3                                  |
| HOXD12           | 18.2                                  |
| INSM2            | 18.2                                  |
| HIST1H2BF        | 18.2                                  |
| GPRIN1           | 18.2                                  |
| FAM19A1          | 18.2                                  |
| FSD1             | 18.1                                  |
| TERT             | 18.1                                  |
| RP5-1119A7.17    | 18.1                                  |
| MEIOB            | 18.0                                  |
| PBK              | 18.0                                  |
| PHF21B           | 18.0                                  |
| LINC01346        | 18.0                                  |
| FRMD5            | 18.0                                  |
| RP11-540E16.2    | 18.0                                  |
| HES6             | 18.0                                  |
| KRT9             | 17.9                                  |
| RP11-796E10.1    | 17.9                                  |
| RP11-55K22.2     | 17.9                                  |
| NEK2             | 17.9                                  |
| HNF1A            | 17.9                                  |
| DDX25            | 17.9                                  |
| MIR490           | 17.8                                  |
| RP11-100K18.1    | 17.7                                  |
| RP11-378I6.1     | 17.7                                  |
| SNX18P7          | 17.7                                  |
| LA16c-321D4.2    | 17.7                                  |
| LINC01250        | 17.7                                  |
| VWC2L            | 17.7                                  |
| RP11-1L9.1       | 17.6                                  |
| MAGEA6           | 17.6                                  |
| GLYATL1P2        | 17.6                                  |
| KRTAP4-1         | 17.5                                  |
| TMEM178B         | 17.5                                  |
| SCN2A            | 17.5                                  |
| RP11-365D9.1     | 17.5                                  |
| RP11-576D8.4     | 17.5                                  |
| PROKR1           | 17.5                                  |
| TMEFF2           | 17.5                                  |

| <b>Gene Name</b>     | <b>Fold change relative to normal</b> |
|----------------------|---------------------------------------|
| <i>PCDHGA1</i>       | 17.4                                  |
| <i>UNC13A</i>        | 17.4                                  |
| <i>CTD-2307P3.1</i>  | 17.4                                  |
| <i>NR0B1</i>         | 17.4                                  |
| <i>LINC01152</i>     | 17.4                                  |
| <i>KIF14</i>         | 17.4                                  |
| <i>UBE2SP2</i>       | 17.4                                  |
| <i>CELF3</i>         | 17.3                                  |
| <i>RP11-672L10.2</i> | 17.3                                  |
| <i>KIF18B</i>        | 17.3                                  |
| <i>CA9</i>           | 17.2                                  |
| <i>DPF1</i>          | 17.2                                  |
| <i>RP11-268G13.1</i> | 17.2                                  |
| <i>PRSS29P</i>       | 17.2                                  |
| <i>TSHR</i>          | 17.2                                  |
| <i>FGF12-AS3</i>     | 17.2                                  |
| <i>SRRM4</i>         | 17.2                                  |
| <i>KCNJ3</i>         | 17.2                                  |
| <i>MCM10</i>         | 17.1                                  |
| <i>CTD-2034I21.2</i> | 17.1                                  |
| <i>RP11-115D19.1</i> | 17.1                                  |
| <i>NRCAM</i>         | 17.1                                  |
| <i>SHD</i>           | 17.0                                  |
| <i>CTD-2089N3.2</i>  | 17.0                                  |
| <i>CD24P4</i>        | 17.0                                  |
| <i>RFX4</i>          | 17.0                                  |
| <i>SULT4A1</i>       | 17.0                                  |
| <i>KIF5A</i>         | 16.9                                  |
| <i>LINC00634</i>     | 16.9                                  |
| <i>GPX2</i>          | 16.9                                  |
| <i>C9orf53</i>       | 16.9                                  |
| <i>RP11-379L18.1</i> | 16.9                                  |
| <i>ESPL1</i>         | 16.9                                  |
| <i>CCNE2</i>         | 16.8                                  |
| <i>GNGT1</i>         | 16.8                                  |
| <i>TTK</i>           | 16.7                                  |
| <i>MIR335</i>        | 16.7                                  |
| <i>RP11-552E20.4</i> | 16.7                                  |
| <i>SATL1</i>         | 16.7                                  |
| <i>CA6</i>           | 16.6                                  |
| <i>E2F8</i>          | 16.6                                  |
| <i>BHLHE23</i>       | 16.6                                  |
| <i>SIX3</i>          | 16.6                                  |
| <i>PCDHB17</i>       | 16.6                                  |
| <i>OPTC</i>          | 16.6                                  |
| <i>MTNR1B</i>        | 16.6                                  |
| <i>RP11-616M22.7</i> | 16.6                                  |
| <i>A1CF</i>          | 16.6                                  |
| <i>EYA2</i>          | 16.6                                  |
| <i>ASF1B</i>         | 16.6                                  |
| <i>DEPDC1B</i>       | 16.6                                  |

| <b>Gene Name</b>      | <b>Fold change relative to normal</b> |
|-----------------------|---------------------------------------|
| <i>HOXD4</i>          | 16.6                                  |
| <i>FBLL1</i>          | 16.5                                  |
| <i>ILDR2</i>          | 16.5                                  |
| <i>STIL</i>           | 16.5                                  |
| <i>CTD-3006G17.2</i>  | 16.5                                  |
| <i>C6orf195</i>       | 16.5                                  |
| <i>ADAMTS18</i>       | 16.5                                  |
| <i>GPR158</i>         | 16.4                                  |
| <i>AC105402.4</i>     | 16.4                                  |
| <i>NOL4</i>           | 16.4                                  |
| <i>HOXA10</i>         | 16.4                                  |
| <i>CTD-2527I21.15</i> | 16.4                                  |
| <i>BARX1</i>          | 16.4                                  |
| <i>CTSV</i>           | 16.4                                  |
| <i>NKX2-4</i>         | 16.3                                  |
| <i>RP11-776H12.1</i>  | 16.3                                  |
| <i>VENTXP5</i>        | 16.3                                  |
| <i>RP11-771K4.1</i>   | 16.3                                  |
| <i>AVPR1B</i>         | 16.3                                  |
| <i>RP11-474D1.4</i>   | 16.2                                  |
| <i>CCKBR</i>          | 16.2                                  |
| <i>RP11-353N14.2</i>  | 16.2                                  |
| <i>LINC01079</i>      | 16.2                                  |
| <i>U82695.5</i>       | 16.1                                  |
| <i>CDCA8</i>          | 16.1                                  |
| <i>ASTN1</i>          | 16.0                                  |
| <i>RP11-65D17.1</i>   | 16.0                                  |
| <i>RP11-685A21.1</i>  | 16.0                                  |
| <i>ERVMER61-1</i>     | 16.0                                  |
| <i>WNK3</i>           | 16.0                                  |
| <i>PTCHD2</i>         | 16.0                                  |
| <i>RP1-76B20.11</i>   | 15.9                                  |
| <i>RELN</i>           | 15.9                                  |
| <i>ADARB2-AS1</i>     | 15.9                                  |
| <i>DNAJC22</i>        | 15.9                                  |
| <i>CENPI</i>          | 15.9                                  |
| <i>RP11-108K3.2</i>   | 15.9                                  |
| <i>NKAIN1</i>         | 15.9                                  |
| <i>ADD2</i>           | 15.8                                  |
| <i>MAST1</i>          | 15.8                                  |
| <i>CDC25C</i>         | 15.8                                  |
| <i>PCDHGB1</i>        | 15.8                                  |
| <i>KCNH8</i>          | 15.8                                  |
| <i>SLC6A5</i>         | 15.8                                  |
| <i>SLCO6A1</i>        | 15.8                                  |
| <i>RNF144A-AS1</i>    | 15.8                                  |
| <i>RP11-25H12.1</i>   | 15.8                                  |
| <i>CTD-2234N14.2</i>  | 15.8                                  |
| <i>TPX2</i>           | 15.8                                  |
| <i>CPNE4</i>          | 15.8                                  |
| <i>SLITRK6</i>        | 15.7                                  |

| <b>Gene Name</b>      | <b>Fold change relative to normal</b> |
|-----------------------|---------------------------------------|
| <i>RP4-676L2.1</i>    | 15.7                                  |
| <i>RP11-656G20.1</i>  | 15.7                                  |
| <i>EXO1</i>           | 15.7                                  |
| <i>LINC00898</i>      | 15.7                                  |
| <i>CHST8</i>          | 15.7                                  |
| <i>RIPPLY3</i>        | 15.7                                  |
| <i>SYN1</i>           | 15.6                                  |
| <i>UHRF1</i>          | 15.6                                  |
| <i>TMEM151B</i>       | 15.6                                  |
| <i>NGEF</i>           | 15.6                                  |
| <i>RP5-1028L10.2</i>  | 15.6                                  |
| <i>ADCY1</i>          | 15.6                                  |
| <i>RP11-567M16.1</i>  | 15.6                                  |
| <i>RPS16P9</i>        | 15.6                                  |
| <i>LINC00958</i>      | 15.5                                  |
| <i>MYT1</i>           | 15.5                                  |
| <i>KRT17P1</i>        | 15.5                                  |
| <i>OR51E2</i>         | 15.5                                  |
| <i>RP11-538I12.3</i>  | 15.5                                  |
| <i>SNAP25</i>         | 15.5                                  |
| <i>RP11-605F22.2</i>  | 15.5                                  |
| <i>HIST1H3G</i>       | 15.5                                  |
| <i>RP11-103J17.2</i>  | 15.5                                  |
| <i>KIF2C</i>          | 15.4                                  |
| <i>TUBB3</i>          | 15.4                                  |
| <i>RHBDL3</i>         | 15.4                                  |
| <i>HOXB-AS3</i>       | 15.4                                  |
| <i>FGF12</i>          | 15.4                                  |
| <i>RP11-284F21.10</i> | 15.4                                  |
| <i>PCDH19</i>         | 15.4                                  |
| <i>CENPF</i>          | 15.4                                  |
| <i>DDC</i>            | 15.4                                  |
| <i>WNK2</i>           | 15.4                                  |
| <i>TMPRSS4-AS1</i>    | 15.3                                  |
| <i>MGAT5B</i>         | 15.3                                  |
| <i>APLP1</i>          | 15.3                                  |
| <i>CFHR3</i>          | 15.3                                  |
| <i>RP11-450H6.3</i>   | 15.3                                  |
| <i>RP11-375B1.3</i>   | 15.3                                  |
| <i>CKAP2L</i>         | 15.3                                  |
| <i>FMN2</i>           | 15.3                                  |
| <i>CTC-338M12.9</i>   | 15.3                                  |
| <i>EPHA8</i>          | 15.2                                  |
| <i>RP11-794G24.1</i>  | 15.2                                  |
| <i>KIF19</i>          | 15.2                                  |
| <i>EEF1A2</i>         | 15.2                                  |
| <i>RP5-827C21.2</i>   | 15.1                                  |
| <i>CCDC129</i>        | 15.1                                  |
| <i>SOHLH2</i>         | 15.1                                  |
| <i>LINC01413</i>      | 15.1                                  |
| <i>GINS2</i>          | 15.1                                  |

| <b>Gene Name</b>     | <b>Fold change relative to normal</b> |
|----------------------|---------------------------------------|
| <i>RP11-402J6.1</i>  | 15.0                                  |
| <i>AIRE</i>          | 15.0                                  |
| <i>BRIP1</i>         | 15.0                                  |
| <i>UBE2T</i>         | 15.0                                  |
| <i>IGSF1</i>         | 15.0                                  |
| <i>FOXE3</i>         | 15.0                                  |
| <i>FAM72B</i>        | 14.9                                  |
| <i>AC005624.2</i>    | 14.9                                  |
| <i>FOXD1</i>         | 14.9                                  |
| <i>AMPH</i>          | 14.9                                  |
| <i>RP11-657O9.1</i>  | 14.9                                  |
| <i>BHMT</i>          | 14.9                                  |
| <i>LHX1</i>          | 14.8                                  |
| <i>RP11-57A19.2</i>  | 14.8                                  |
| <i>PCDHB1</i>        | 14.8                                  |
| <i>TROAP</i>         | 14.8                                  |
| <i>CAMK2N2</i>       | 14.8                                  |
| <i>RBFox3</i>        | 14.8                                  |
| <i>KIRREL3-AS3</i>   | 14.8                                  |
| <i>TRPA1</i>         | 14.7                                  |
| <i>TOMM20P3</i>      | 14.7                                  |
| <i>IQGAP3</i>        | 14.7                                  |
| <i>MROH3P</i>        | 14.7                                  |
| <i>COCH</i>          | 14.7                                  |
| <i>UBE2QL1</i>       | 14.7                                  |
| <i>AC006946.15</i>   | 14.7                                  |
| <i>TENM3</i>         | 14.7                                  |
| <i>MAP1B</i>         | 14.7                                  |
| <i>DPP10-AS1</i>     | 14.6                                  |
| <i>ACTL8</i>         | 14.6                                  |
| <i>MUC6</i>          | 14.6                                  |
| <i>SH3GL2</i>        | 14.6                                  |
| <i>ANK1</i>          | 14.6                                  |
| <i>MMP26</i>         | 14.6                                  |
| <i>KCNJ4</i>         | 14.6                                  |
| <i>GRM8</i>          | 14.5                                  |
| <i>VSX1</i>          | 14.5                                  |
| <i>GINS1</i>         | 14.5                                  |
| <i>VWA5B2</i>        | 14.5                                  |
| <i>RP11-680H20.2</i> | 14.5                                  |
| <i>THEG</i>          | 14.5                                  |
| <i>GPIHBP1</i>       | 14.5                                  |
| <i>NDC80</i>         | 14.4                                  |
| <i>BSX</i>           | 14.4                                  |
| <i>HERC2P5</i>       | 14.4                                  |
| <i>ORC6</i>          | 14.4                                  |
| <i>LHX3</i>          | 14.4                                  |
| <i>RP11-672L10.1</i> | 14.4                                  |
| <i>AC067961.1</i>    | 14.4                                  |
| <i>B4GALNT4</i>      | 14.4                                  |
| <i>MNX1</i>          | 14.4                                  |

| <b>Gene Name</b>     | <b>Fold change relative to normal</b> |
|----------------------|---------------------------------------|
| <i>FOXM1</i>         | 14.3                                  |
| <i>KLHL14</i>        | 14.3                                  |
| <i>CHRM4</i>         | 14.3                                  |
| <i>NR5A1</i>         | 14.3                                  |
| <i>CACNA1B</i>       | 14.3                                  |
| <i>PPFIA4</i>        | 14.3                                  |
| <i>PFN2</i>          | 14.3                                  |
| <i>RP11-108M12.3</i> | 14.3                                  |
| <i>RP11-758M4.1</i>  | 14.3                                  |
| <i>PCDH8P1</i>       | 14.3                                  |
| <i>ESPNP</i>         | 14.3                                  |
| <i>KCNH3</i>         | 14.2                                  |
| <i>VWA5B1</i>        | 14.2                                  |
| <i>SOX21</i>         | 14.2                                  |
| <i>CDKN2C</i>        | 14.2                                  |
| <i>LINC01116</i>     | 14.2                                  |
| <i>ECT2</i>          | 14.2                                  |
| <i>SCN5A</i>         | 14.1                                  |
| <i>U91319.1</i>      | 14.1                                  |
| <i>NUSAP1</i>        | 14.1                                  |
| <i>HIST1H3F</i>      | 14.1                                  |
| <i>CTA-254O6.1</i>   | 14.1                                  |
| <i>LINC00470</i>     | 14.1                                  |
| <i>MAGED4</i>        | 14.0                                  |
| <i>HJURP</i>         | 14.0                                  |
| <i>FAM72C</i>        | 14.0                                  |
| <i>LHFPL5</i>        | 14.0                                  |
| <i>FBXO43</i>        | 14.0                                  |
| <i>TFF3</i>          | 14.0                                  |
| <i>PKIB</i>          | 14.0                                  |
| <i>MKI67</i>         | 14.0                                  |
| <i>KIAA0087</i>      | 13.9                                  |
| <i>TUBB2BP1</i>      | 13.9                                  |
| <i>GP2</i>           | 13.9                                  |
| <i>RP11-161I6.2</i>  | 13.9                                  |
| <i>OTP</i>           | 13.9                                  |
| <i>POU4F2</i>        | 13.9                                  |
| <i>USH1C</i>         | 13.9                                  |
| <i>GRM5</i>          | 13.8                                  |
| <i>RP11-109M17.2</i> | 13.8                                  |
| <i>TRPM2-AS</i>      | 13.8                                  |
| <i>RP11-666A20.3</i> | 13.8                                  |
| <i>RP1-40E16.9</i>   | 13.8                                  |
| <i>HOXA10-AS</i>     | 13.8                                  |
| <i>FEZF1</i>         | 13.8                                  |
| <i>CTD-2568A17.1</i> | 13.8                                  |
| <i>DGCR5</i>         | 13.8                                  |
| <i>RP11-279F6.1</i>  | 13.8                                  |
| <i>GTSE1</i>         | 13.8                                  |
| <i>ZNF711</i>        | 13.8                                  |
| <i>CELSR3</i>        | 13.8                                  |

| <b>Gene Name</b>      | <b>Fold change relative to normal</b> |
|-----------------------|---------------------------------------|
| <i>SNCB</i>           | 13.8                                  |
| <i>CCDC169</i>        | 13.8                                  |
| <i>CTD-2377D24.6</i>  | 13.7                                  |
| <i>DNAJC12</i>        | 13.7                                  |
| <i>KRT8P30</i>        | 13.7                                  |
| <i>LINC01208</i>      | 13.7                                  |
| <i>CHD5</i>           | 13.7                                  |
| <i>MS4A8</i>          | 13.7                                  |
| <i>C12orf42</i>       | 13.7                                  |
| <i>HIST1H4B</i>       | 13.7                                  |
| <i>FAM57B</i>         | 13.6                                  |
| <i>RP11-738B7.1</i>   | 13.6                                  |
| <i>TLX1</i>           | 13.6                                  |
| <i>CDC20</i>          | 13.6                                  |
| <i>SP9</i>            | 13.6                                  |
| <i>MIR196A1</i>       | 13.5                                  |
| <i>SLC30A2</i>        | 13.5                                  |
| <i>CTD-2587H24.10</i> | 13.5                                  |
| <i>CBX2</i>           | 13.5                                  |
| <i>SRCIN1</i>         | 13.5                                  |
| <i>BUB1B</i>          | 13.4                                  |
| <i>RP11-284F21.9</i>  | 13.4                                  |
| <i>RNF183</i>         | 13.4                                  |
| <i>CDIPT-AS1</i>      | 13.4                                  |
| <i>GSX1</i>           | 13.4                                  |
| <i>AC018641.7</i>     | 13.4                                  |
| <i>ANO4</i>           | 13.4                                  |
| <i>RP11-496N12.6</i>  | 13.3                                  |
| <i>GNAO1</i>          | 13.3                                  |
| <i>CUX2</i>           | 13.3                                  |
| <i>HIST1H4A</i>       | 13.3                                  |
| <i>LINC01018</i>      | 13.3                                  |
| <i>NCAPG</i>          | 13.3                                  |
| <i>SLC8A2</i>         | 13.3                                  |
| <i>HIST1H3C</i>       | 13.3                                  |
| <i>B4GALNT1</i>       | 13.3                                  |
| <i>RP4-694A7.2</i>    | 13.3                                  |
| <i>SI</i>             | 13.3                                  |
| <i>TYMSOS</i>         | 13.2                                  |
| <i>RASAL1</i>         | 13.2                                  |
| <i>SCML2</i>          | 13.2                                  |
| <i>USP41</i>          | 13.2                                  |
| <i>LINC01234</i>      | 13.2                                  |
| <i>FZD9</i>           | 13.2                                  |
| <i>ST8SIA6-AS1</i>    | 13.2                                  |
| <i>NMU</i>            | 13.2                                  |
| <i>CRMP1</i>          | 13.2                                  |
| <i>SEC11C</i>         | 13.2                                  |
| <i>XKR5</i>           | 13.2                                  |
| <i>MCM2</i>           | 13.2                                  |
| <i>UGT8</i>           | 13.2                                  |



| <b>Gene Name</b>     | <b>Fold change relative to normal</b> |
|----------------------|---------------------------------------|
| <i>ORC1</i>          | 13.2                                  |
| <i>SRRM3</i>         | 13.1                                  |
| <i>MAPT</i>          | 13.1                                  |
| <i>CASC5</i>         | 13.1                                  |
| <i>AP001631.9</i>    | 13.1                                  |
| <i>KC6</i>           | 13.1                                  |
| <i>ALX3</i>          | 13.1                                  |
| <i>HOXB5</i>         | 13.1                                  |
| <i>FAM131C</i>       | 13.1                                  |
| <i>KLHDC8A</i>       | 13.1                                  |
| <i>DYNC1I1</i>       | 13.1                                  |
| <i>CKMT1B</i>        | 13.1                                  |
| <i>MMP16</i>         | 13.1                                  |
| <i>TFF1</i>          | 13.1                                  |
| <i>RP11-286B14.1</i> | 13.0                                  |
| <i>EFTUD1P1</i>      | 13.0                                  |
| <i>ESCO2</i>         | 13.0                                  |
| <i>DUSP26</i>        | 13.0                                  |
| <i>GAS2</i>          | 13.0                                  |
| <i>AC003102.3</i>    | 12.9                                  |
| <i>AC008088.4</i>    | 12.9                                  |
| <i>CCL25</i>         | 12.9                                  |
| <i>CNTFR</i>         | 12.9                                  |
| <i>AC009014.3</i>    | 12.9                                  |
| <i>PCDHGA8</i>       | 12.8                                  |
| <i>CTD-2318O12.1</i> | 12.8                                  |
| <i>RAB3C</i>         | 12.8                                  |
| <i>RP11-480I12.4</i> | 12.8                                  |
| <i>CHRNA5</i>        | 12.8                                  |
| <i>DIRAS2</i>        | 12.8                                  |
| <i>TMEM8C</i>        | 12.8                                  |
| <i>PCSK2</i>         | 12.8                                  |
| <i>RP13-614K11.2</i> | 12.8                                  |
| <i>CCDC34</i>        | 12.8                                  |
| <i>EMILIN3</i>       | 12.8                                  |
| <i>CTD-2256P15.1</i> | 12.8                                  |
| <i>LINC01122</i>     | 12.7                                  |
| <i>CDCA5</i>         | 12.7                                  |
| <i>RP11-513G11.4</i> | 12.7                                  |
| <i>LYPD6</i>         | 12.7                                  |
| <i>MAD2L1</i>        | 12.7                                  |
| <i>RP11-209K10.2</i> | 12.7                                  |
| <i>SLC30A10</i>      | 12.7                                  |
| <i>RP11-698N11.2</i> | 12.7                                  |
| <i>CACNG2</i>        | 12.6                                  |
| <i>RP11-449P1.1</i>  | 12.6                                  |
| <i>TMEM63C</i>       | 12.6                                  |
| <i>PNMA6C</i>        | 12.6                                  |
| <i>RRM2</i>          | 12.6                                  |
| <i>SPC24</i>         | 12.6                                  |
| <i>GREB1L</i>        | 12.6                                  |

| <b>Gene Name</b>     | <b>Fold change relative to normal</b> |
|----------------------|---------------------------------------|
| <i>LRFN5</i>         | 12.6                                  |
| <i>GS1-24F4.2</i>    | 12.6                                  |
| <i>CDC45</i>         | 12.6                                  |
| <i>WDR62</i>         | 12.6                                  |
| <i>ADAM22</i>        | 12.5                                  |
| <i>KIAA1549L</i>     | 12.5                                  |
| <i>POLQ</i>          | 12.5                                  |
| <i>PRSS3P2</i>       | 12.5                                  |
| <i>CSAG1</i>         | 12.5                                  |
| <i>RP11-373E16.3</i> | 12.5                                  |
| <i>AK5</i>           | 12.5                                  |
| <i>ATP2B2</i>        | 12.5                                  |
| <i>HIST1H2AE</i>     | 12.5                                  |
| <i>HDAC1P2</i>       | 12.5                                  |
| <i>NCAPH</i>         | 12.5                                  |
| <i>CDC6</i>          | 12.5                                  |
| <i>TAL2</i>          | 12.4                                  |
| <i>WASF1</i>         | 12.4                                  |
| <i>CECR6</i>         | 12.4                                  |
| <i>NAT8L</i>         | 12.4                                  |
| <i>DRP2</i>          | 12.4                                  |
| <i>BVES-AS1</i>      | 12.4                                  |
| <i>IGF2BP3</i>       | 12.4                                  |
| <i>TP73</i>          | 12.4                                  |
| <i>RPS27P25</i>      | 12.4                                  |
| <i>CCNB2</i>         | 12.4                                  |
| <i>UBE2SP1</i>       | 12.4                                  |
| <i>KIAA2022</i>      | 12.4                                  |
| <i>SCG5</i>          | 12.3                                  |
| <i>NPTX1</i>         | 12.3                                  |
| <i>PEG10</i>         | 12.3                                  |
| <i>IGFL1P2</i>       | 12.3                                  |
| <i>RP11-546J1.1</i>  | 12.3                                  |
| <i>KCNT1</i>         | 12.3                                  |
| <i>EBF3</i>          | 12.3                                  |
| <i>RP11-715J22.6</i> | 12.2                                  |
| <i>KCNC4-AS1</i>     | 12.2                                  |
| <i>E2F2</i>          | 12.2                                  |
| <i>RP11-541G9.1</i>  | 12.2                                  |
| <i>RP11-120K24.4</i> | 12.2                                  |
| <i>MUC2</i>          | 12.2                                  |
| <i>ZACN</i>          | 12.2                                  |
| <i>NKX3-2</i>        | 12.2                                  |
| <i>BSN</i>           | 12.2                                  |
| <i>PHGR1</i>         | 12.2                                  |
| <i>UBE2C</i>         | 12.2                                  |
| <i>SNORD113-3</i>    | 12.1                                  |
| <i>PODXL2</i>        | 12.1                                  |
| <i>SPATA16</i>       | 12.1                                  |
| <i>SLC38A11</i>      | 12.1                                  |
| <i>RP11-379L18.3</i> | 12.1                                  |

| <b>Gene Name</b>      | <b>Fold change relative to normal</b> |
|-----------------------|---------------------------------------|
| <i>FAR2P3</i>         | 12.1                                  |
| <i>RP11-461O7.1</i>   | 12.1                                  |
| <i>SCG2</i>           | 12.1                                  |
| <i>MPPED1</i>         | 12.1                                  |
| <i>PDX1-AS1</i>       | 12.1                                  |
| <i>SIX4</i>           | 12.1                                  |
| <i>RP11-396O20.2</i>  | 12.0                                  |
| <i>RP1-90L14.1</i>    | 12.0                                  |
| <i>SLC38A8</i>        | 12.0                                  |
| <i>PRC1</i>           | 12.0                                  |
| <i>RP11-120J1.1</i>   | 12.0                                  |
| <i>RP11-441F2.5</i>   | 12.0                                  |
| <i>GRK1</i>           | 12.0                                  |
| <i>RP5-827C21.6</i>   | 12.0                                  |
| <i>KIF24</i>          | 12.0                                  |
| <i>SGOL1</i>          | 12.0                                  |
| <i>NETO2</i>          | 11.9                                  |
| <i>MAFA</i>           | 11.9                                  |
| <i>CNIH2</i>          | 11.9                                  |
| <i>RP11-563K23.1</i>  | 11.9                                  |
| <i>RP11-159H10.3</i>  | 11.9                                  |
| <i>ARHGEF7-IT1</i>    | 11.9                                  |
| <i>GPT2</i>           | 11.9                                  |
| <i>AC005618.6</i>     | 11.9                                  |
| <i>RAB9B</i>          | 11.9                                  |
| <i>HIST1H3B</i>       | 11.9                                  |
| <i>PATE2</i>          | 11.9                                  |
| <i>SEMA5B</i>         | 11.8                                  |
| <i>SPAG5</i>          | 11.8                                  |
| <i>C20orf203</i>      | 11.8                                  |
| <i>MEST</i>           | 11.8                                  |
| <i>RP11-410N8.3</i>   | 11.8                                  |
| <i>CTC-537E7.2</i>    | 11.8                                  |
| <i>ERCC6L</i>         | 11.8                                  |
| <i>LRRC10</i>         | 11.8                                  |
| <i>FAM171B</i>        | 11.8                                  |
| <i>LL0XNC01-16G2.</i> | 11.7                                  |
| <i>SRSF12</i>         | 11.7                                  |
| <i>STYK1</i>          | 11.7                                  |
| <i>RP11-36N20.1</i>   | 11.7                                  |
| <i>C1QL3</i>          | 11.7                                  |
| <i>CABYR</i>          | 11.7                                  |
| <i>LINC00951</i>      | 11.7                                  |
| <i>Metazoa_SRP</i>    | 11.7                                  |
| <i>CLPSL2</i>         | 11.7                                  |
| <i>FLJ46066</i>       | 11.7                                  |
| <i>UBA52P6</i>        | 11.7                                  |
| <i>AC009336.24</i>    | 11.7                                  |
| <i>NEURL1</i>         | 11.7                                  |
| <i>SRPK3</i>          | 11.6                                  |
| <i>CHRNA3</i>         | 11.6                                  |

| <b>Gene Name</b>     | <b>Fold change relative to normal</b> |
|----------------------|---------------------------------------|
| <i>TUBA3GP</i>       | 11.6                                  |
| <i>CELF5</i>         | 11.6                                  |
| <i>CENPA</i>         | 11.6                                  |
| <i>RP11-482D24.2</i> | 11.6                                  |
| <i>C16orf59</i>      | 11.6                                  |
| <i>FOXO6</i>         | 11.6                                  |
| <i>EYA1</i>          | 11.6                                  |
| <i>Six3os1_2</i>     | 11.6                                  |
| <i>LSAMP-AS1</i>     | 11.6                                  |
| <i>DEPDC1-AS1</i>    | 11.5                                  |
| <i>OR2B6</i>         | 11.5                                  |
| <i>KIF15</i>         | 11.5                                  |
| <i>RP11-470P21.2</i> | 11.5                                  |
| <i>SCGB2A1</i>       | 11.5                                  |
| <i>NWD2</i>          | 11.5                                  |
| <i>ADAM23</i>        | 11.4                                  |
| <i>PAK7</i>          | 11.4                                  |
| <i>GRIK1</i>         | 11.4                                  |
| <i>ZNF724P</i>       | 11.4                                  |
| <i>GRIK5</i>         | 11.4                                  |
| <i>TRIP13</i>        | 11.4                                  |
| <i>RP11-482D24.3</i> | 11.4                                  |
| <i>GPR142</i>        | 11.4                                  |
| <i>XRCC2</i>         | 11.3                                  |
| <i>MANEAL</i>        | 11.3                                  |
| <i>LECT1</i>         | 11.3                                  |
| <i>CDC25A</i>        | 11.3                                  |
| <i>CTD-2555A7.2</i>  | 11.3                                  |
| <i>LRRC9</i>         | 11.3                                  |
| <i>PNMA3</i>         | 11.3                                  |
| <i>ZNF367</i>        | 11.3                                  |
| <i>RP11-321L2.1</i>  | 11.3                                  |
| <i>UBE2S</i>         | 11.3                                  |
| <i>RP11-480I12.7</i> | 11.3                                  |
| <i>AC010729.1</i>    | 11.2                                  |
| <i>RP11-80B9.1</i>   | 11.2                                  |
| <i>KIRREL2</i>       | 11.2                                  |
| <i>FAM83D</i>        | 11.2                                  |
| <i>TICRR</i>         | 11.2                                  |
| <i>LINC01397</i>     | 11.2                                  |
| <i>KCNF1</i>         | 11.2                                  |
| <i>DSCAML1</i>       | 11.2                                  |
| <i>RAD51AP1</i>      | 11.2                                  |
| <i>CDCA2</i>         | 11.1                                  |
| <i>OR7E83P</i>       | 11.1                                  |
| <i>PACSIN1</i>       | 11.1                                  |
| <i>TRIM45</i>        | 11.1                                  |
| <i>MGAT4C</i>        | 11.1                                  |
| <i>RP11-78F17.1</i>  | 11.1                                  |
| <i>GPR62</i>         | 11.1                                  |
| <i>RP11-107C16.2</i> | 11.1                                  |

| <b>Gene Name</b>     | <b>Fold change relative to normal</b> |
|----------------------|---------------------------------------|
| <i>CD24</i>          | 11.0                                  |
| <i>CACNA2D1</i>      | 11.0                                  |
| <i>CTD-2231H16.1</i> | 11.0                                  |
| <i>STX1A</i>         | 11.0                                  |
| <i>ITIH6</i>         | 11.0                                  |
| <i>CDX2</i>          | 11.0                                  |
| <i>SYP</i>           | 11.0                                  |
| <i>RP4-616B8.6</i>   | 11.0                                  |
| <i>BRSK1</i>         | 11.0                                  |
| <i>TNNT1</i>         | 11.0                                  |
| <i>IL23A</i>         | 11.0                                  |
| <i>UMOD</i>          | 11.0                                  |
| <i>OR2W6P</i>        | 11.0                                  |
| <i>IGSF9</i>         | 11.0                                  |
| <i>AC093702.1</i>    | 10.9                                  |
| <i>CLPSL1</i>        | 10.9                                  |
| <i>MAGED4B</i>       | 10.9                                  |
| <i>KLF2P4</i>        | 10.9                                  |
| <i>MAP7D2</i>        | 10.9                                  |
| <i>KIFC1</i>         | 10.9                                  |
| <i>RP11-97012.2</i>  | 10.9                                  |
| <i>RP11-22011.2</i>  | 10.9                                  |
| <i>AC053503.4</i>    | 10.9                                  |
| <i>ARHGAP26-AS1</i>  | 10.9                                  |
| <i>KIF20A</i>        | 10.9                                  |
| <i>AC007326.9</i>    | 10.9                                  |
| <i>PCDHA1</i>        | 10.8                                  |
| <i>NEIL3</i>         | 10.8                                  |
| <i>GABRA3</i>        | 10.8                                  |
| <i>PNMAL1</i>        | 10.8                                  |
| <i>RP11-439M11.1</i> | 10.8                                  |
| <i>LINC01134</i>     | 10.8                                  |
| <i>PEX5L-AS2</i>     | 10.8                                  |
| <i>POLE2</i>         | 10.8                                  |
| <i>CCDC150</i>       | 10.7                                  |
| <i>AURKB</i>         | 10.7                                  |
| <i>TLX2</i>          | 10.7                                  |
| <i>MESTP3</i>        | 10.7                                  |
| <i>RP11-149I2.4</i>  | 10.7                                  |
| <i>RAB26</i>         | 10.7                                  |
| <i>MFI2</i>          | 10.7                                  |
| <i>RP11-416N4.1</i>  | 10.7                                  |
| <i>CCDC178</i>       | 10.7                                  |
| <i>EVX2</i>          | 10.7                                  |
| <i>RP11-485G7.6</i>  | 10.7                                  |
| <i>AC096574.4</i>    | 10.7                                  |
| <i>SEPT3</i>         | 10.7                                  |
| <i>RP11-519M16.1</i> | 10.6                                  |
| <i>HPDL</i>          | 10.6                                  |
| <i>ANKRD18B</i>      | 10.6                                  |
| <i>RP11-157E16.1</i> | 10.6                                  |

| <b>Gene Name</b>     | <b>Fold change relative to normal</b> |
|----------------------|---------------------------------------|
| <i>RFC4</i>          | 10.6                                  |
| <i>TOX3</i>          | 10.6                                  |
| <i>MYOD1</i>         | 10.6                                  |
| <i>VCX3A</i>         | 10.6                                  |
| <i>RP11-715J22.2</i> | 10.6                                  |
| <i>RP5-944M2.3</i>   | 10.6                                  |
| <i>KIF25-AS1</i>     | 10.6                                  |
| <i>EZH2P1</i>        | 10.6                                  |
| <i>RP11-575G13.2</i> | 10.6                                  |
| <i>GPR137C</i>       | 10.6                                  |
| <i>SYT2</i>          | 10.6                                  |
| <i>PTPRH</i>         | 10.6                                  |
| <i>NKX6-1</i>        | 10.6                                  |
| <i>NOVA1-AS1</i>     | 10.6                                  |
| <i>RP11-346D19.1</i> | 10.6                                  |
| <i>SKA3</i>          | 10.6                                  |
| <i>ASTN2</i>         | 10.5                                  |
| <i>RP11-364C11.3</i> | 10.5                                  |
| <i>SAPCD2</i>        | 10.5                                  |
| <i>LINC00866</i>     | 10.5                                  |
| <i>SLCO5A1</i>       | 10.5                                  |
| <i>SIX1</i>          | 10.5                                  |
| <i>FSIP2</i>         | 10.5                                  |
| <i>RP1-310O13.13</i> | 10.5                                  |
| <i>JPH3</i>          | 10.5                                  |
| <i>VAT1L</i>         | 10.5                                  |
| <i>RP11-187E13.1</i> | 10.5                                  |
| <i>HCN4</i>          | 10.5                                  |
| <i>PCDHA4</i>        | 10.5                                  |
| <i>GPR19</i>         | 10.5                                  |
| <i>LINC00051</i>     | 10.5                                  |
| <i>GPR149</i>        | 10.4                                  |
| <i>FAM83F</i>        | 10.4                                  |
| <i>FOXB2</i>         | 10.4                                  |
| <i>RP11-390F4.3</i>  | 10.4                                  |
| <i>RP11-713P17.5</i> | 10.4                                  |
| <i>CTD-2532D12.4</i> | 10.4                                  |
| <i>KLK1</i>          | 10.4                                  |
| <i>GAP43</i>         | 10.4                                  |
| <i>CSMD3</i>         | 10.4                                  |
| <i>CDKN3</i>         | 10.4                                  |
| <i>PLEKHG4B</i>      | 10.4                                  |
| <i>RP11-255E6.6</i>  | 10.4                                  |
| <i>LINC00354</i>     | 10.4                                  |
| <i>HIST1H2BJ</i>     | 10.4                                  |
| <i>RP3-497J21.1</i>  | 10.4                                  |
| <i>TIGD3</i>         | 10.4                                  |
| <i>DNAJC6</i>        | 10.4                                  |
| <i>ALLC</i>          | 10.4                                  |
| <i>CTD-2523D13.2</i> | 10.4                                  |
| <i>TBX10</i>         | 10.4                                  |

| <b>Gene Name</b>     | <b>Fold change relative to normal</b> |
|----------------------|---------------------------------------|
| <i>FAM222A-AS1</i>   | 10.4                                  |
| <i>RP11-485G7.5</i>  | 10.3                                  |
| <i>CDK5R1</i>        | 10.3                                  |
| <i>MLLT11</i>        | 10.3                                  |
| <i>RP11-483C6.1</i>  | 10.3                                  |
| <i>HIST1H2BO</i>     | 10.3                                  |
| <i>TFAP2A-AS1</i>    | 10.3                                  |
| <i>BUB1</i>          | 10.3                                  |
| <i>AC234791.1</i>    | 10.3                                  |
| <i>SPC25</i>         | 10.3                                  |
| <i>PARPBP</i>        | 10.3                                  |
| <i>SOX21-AS1</i>     | 10.3                                  |
| <i>HIST2H3C</i>      | 10.3                                  |
| <i>HMMR</i>          | 10.3                                  |
| <i>GRIA2</i>         | 10.3                                  |
| <i>OR7E85P</i>       | 10.3                                  |
| <i>AGBL4</i>         | 10.2                                  |
| <i>OIP5</i>          | 10.2                                  |
| <i>DBH</i>           | 10.2                                  |
| <i>HELLS</i>         | 10.2                                  |
| <i>CACNA1G</i>       | 10.2                                  |
| <i>PLK1</i>          | 10.2                                  |
| <i>SMC1B</i>         | 10.2                                  |
| <i>RP4-604G5.1</i>   | 10.2                                  |
| <i>LINGO1</i>        | 10.2                                  |
| <i>RAB39B</i>        | 10.1                                  |
| <i>HOXD-AS2</i>      | 10.1                                  |
| <i>AC090627.1</i>    | 10.1                                  |
| <i>RP11-144N1.1</i>  | 10.1                                  |
| <i>CLVS1</i>         | 10.1                                  |
| <i>RP11-484D2.2</i>  | 10.1                                  |
| <i>RP5-1092A11.5</i> | 10.1                                  |
| <i>HMGB1P1</i>       | 10.1                                  |
| <i>MYBL2</i>         | 10.1                                  |
| <i>RP11-168K9.2</i>  | 10.1                                  |
| <i>CTC-480C2.1</i>   | 10.1                                  |
| <i>C2orf70</i>       | 10.0                                  |
| <i>SBK1</i>          | 10.0                                  |
| <i>LINC00269</i>     | 10.0                                  |
| <i>AC011322.1</i>    | 10.0                                  |
| <i>TDRG1</i>         | 10.0                                  |
| <i>RP11-117L5.4</i>  | 10.0                                  |
| <i>DDX11-AS1</i>     | 9.9                                   |
| <i>ASB15</i>         | 9.9                                   |
| <i>REEP2</i>         | 9.9                                   |
| <i>RAB39A</i>        | 9.9                                   |
| <i>NRG1-IT1</i>      | 9.9                                   |
| <i>LINC00884</i>     | 9.9                                   |
| <i>LINC00846</i>     | 9.9                                   |
| <i>CA5A</i>          | 9.9                                   |
| <i>CTC-344H19.4</i>  | 9.9                                   |

| <b>Gene Name</b>      | <b>Fold change relative to normal</b> |
|-----------------------|---------------------------------------|
| <i>HIST3H2A</i>       | 9.9                                   |
| <i>JAKMIP2</i>        | 9.8                                   |
| <i>RP4-753M9.1</i>    | 9.8                                   |
| <i>YBX2</i>           | 9.8                                   |
| <i>RP11-579O24.3</i>  | 9.8                                   |
| <i>RP11-254F7.4</i>   | 9.8                                   |
| <i>CENPK</i>          | 9.8                                   |
| <i>RP11-38M8.1</i>    | 9.8                                   |
| <i>LINC00511</i>      | 9.8                                   |
| <i>CCNA2</i>          | 9.8                                   |
| <i>RP11-280K24.4</i>  | 9.8                                   |
| <i>AC064850.4</i>     | 9.7                                   |
| <i>C10orf71</i>       | 9.7                                   |
| <i>AURKA</i>          | 9.7                                   |
| <i>TCF19</i>          | 9.7                                   |
| <i>RP11-561N12.6</i>  | 9.7                                   |
| <i>U95743.1</i>       | 9.7                                   |
| <i>CDH18</i>          | 9.7                                   |
| <i>FAM222A</i>        | 9.7                                   |
| <i>RASSF6</i>         | 9.7                                   |
| <i>SCARNA22</i>       | 9.7                                   |
| <i>LINC00303</i>      | 9.7                                   |
| <i>LINC01117</i>      | 9.7                                   |
| <i>CNKSR3</i>         | 9.6                                   |
| <i>MIP</i>            | 9.6                                   |
| <i>KLF14</i>          | 9.6                                   |
| <i>TCEB3B</i>         | 9.6                                   |
| <i>NCAM1-AS1</i>      | 9.6                                   |
| <i>WDR72</i>          | 9.6                                   |
| <i>HMSD</i>           | 9.6                                   |
| <i>AC018685.1</i>     | 9.6                                   |
| <i>AC012531.25</i>    | 9.6                                   |
| <i>LRP4</i>           | 9.6                                   |
| <i>CLDN11</i>         | 9.6                                   |
| <i>HIST1H4J</i>       | 9.6                                   |
| <i>CTD-2587H24.5</i>  | 9.6                                   |
| <i>PAX9</i>           | 9.6                                   |
| <i>KIF23</i>          | 9.6                                   |
| <i>PPFIA2</i>         | 9.6                                   |
| <i>LGALS17A</i>       | 9.6                                   |
| <i>RP4-760C5.3</i>    | 9.5                                   |
| <i>AC005481.5</i>     | 9.5                                   |
| <i>CDCA3</i>          | 9.5                                   |
| <i>RP1-159G19.1</i>   | 9.5                                   |
| <i>NEB</i>            | 9.5                                   |
| <i>RP11-111M22.5</i>  | 9.5                                   |
| <i>NPAS3</i>          | 9.5                                   |
| <i>AC093063.2</i>     | 9.5                                   |
| <i>TTBK1</i>          | 9.5                                   |
| <i>RP11-680F20.11</i> | 9.5                                   |
| <i>EZH2</i>           | 9.5                                   |



| <b>Gene Name</b>      | <b>Fold change relative to normal</b> |
|-----------------------|---------------------------------------|
| <i>CLCN3P1</i>        | 9.5                                   |
| <i>ZFR2</i>           | 9.5                                   |
| <i>KCNG3</i>          | 9.5                                   |
| <i>AMER2</i>          | 9.5                                   |
| <i>PDIA2</i>          | 9.5                                   |
| <i>FAM171A2</i>       | 9.5                                   |
| <i>HGFAC</i>          | 9.5                                   |
| <i>LMNB1</i>          | 9.5                                   |
| <i>PTTG1</i>          | 9.4                                   |
| <i>RP11-170M17.1</i>  | 9.4                                   |
| <i>LINC00871</i>      | 9.4                                   |
| <i>RP11-1042B17.3</i> | 9.4                                   |
| <i>TRO</i>            | 9.4                                   |
| <i>MTUS2</i>          | 9.4                                   |
| <i>ACRV1</i>          | 9.4                                   |
| <i>AK4P1</i>          | 9.4                                   |
| <i>PCDHB8</i>         | 9.4                                   |
| <i>AUNIP</i>          | 9.4                                   |
| <i>RP11-159H10.1</i>  | 9.3                                   |
| <i>ASS1P11</i>        | 9.3                                   |
| <i>TCEAL2</i>         | 9.3                                   |
| <i>LINC00391</i>      | 9.3                                   |
| <i>GPC2</i>           | 9.3                                   |
| <i>PAX3</i>           | 9.3                                   |
| <i>NOVA1</i>          | 9.3                                   |
| <i>ANKS4B</i>         | 9.3                                   |
| <i>CPT1C</i>          | 9.3                                   |
| <i>CCNB1</i>          | 9.3                                   |
| <i>TFAP2A</i>         | 9.3                                   |
| <i>MIR4697</i>        | 9.3                                   |
| <i>MMD2</i>           | 9.2                                   |
| <i>RP11-352G9.1</i>   | 9.2                                   |
| <i>CDH4</i>           | 9.2                                   |
| <i>RP11-133K1.11</i>  | 9.2                                   |
| <i>ZNF667</i>         | 9.2                                   |
| <i>RP5-928E24.2</i>   | 9.2                                   |
| <i>PCDHA9</i>         | 9.2                                   |
| <i>HIST1H2BI</i>      | 9.2                                   |
| <i>NPTXR</i>          | 9.2                                   |
| <i>RP11-120D5.1</i>   | 9.2                                   |
| <i>TSSC1-IT1</i>      | 9.1                                   |
| <i>RP11-713P17.3</i>  | 9.1                                   |
| <i>CENPU</i>          | 9.1                                   |
| <i>RP11-319E16.1</i>  | 9.1                                   |
| <i>CCDC110</i>        | 9.1                                   |
| <i>RASL10B</i>        | 9.1                                   |
| <i>PTPRG-AS1</i>      | 9.1                                   |
| <i>LGR4</i>           | 9.1                                   |
| <i>NPM1P9</i>         | 9.1                                   |
| <i>AC008074.4</i>     | 9.1                                   |
| <i>RP11-430H10.1</i>  | 9.1                                   |

| <b>Gene Name</b>     | <b>Fold change relative to normal</b> |
|----------------------|---------------------------------------|
| <i>RP11-108L7.15</i> | 9.1                                   |
| <i>TENM4</i>         | 9.1                                   |
| <i>AC097713.3</i>    | 9.1                                   |
| <i>RP11-423H2.3</i>  | 9.0                                   |
| <i>KCNH2</i>         | 9.0                                   |
| <i>CNTFR-AS1</i>     | 9.0                                   |
| <i>MARK1</i>         | 9.0                                   |
| <i>EN2</i>           | 9.0                                   |
| <i>KIAA1524</i>      | 9.0                                   |
| <i>STRA6</i>         | 9.0                                   |
| <i>RP11-524C21.2</i> | 9.0                                   |
| <i>RP11-83M16.6</i>  | 9.0                                   |
| <i>RNF157-AS1</i>    | 8.9                                   |
| <i>RP11-64K12.10</i> | 8.9                                   |
| <i>RP11-650L12.2</i> | 8.9                                   |
| <i>KIF11</i>         | 8.9                                   |
| <i>PSAT1</i>         | 8.9                                   |
| <i>RP5-1178H5.2</i>  | 8.9                                   |
| <i>FANCI</i>         | 8.9                                   |
| <i>ABCC8</i>         | 8.9                                   |
| <i>GJB4</i>          | 8.9                                   |
| <i>BTBD7P1</i>       | 8.9                                   |
| <i>C5orf34</i>       | 8.9                                   |
| <i>C17orf104</i>     | 8.9                                   |
| <i>CDH24</i>         | 8.9                                   |
| <i>SLIT1</i>         | 8.8                                   |
| <i>RP11-98G7.1</i>   | 8.8                                   |
| <i>PGBD5</i>         | 8.8                                   |
| <i>RP11-408N14.1</i> | 8.8                                   |
| <i>RP11-946L16.1</i> | 8.8                                   |
| <i>RP11-88E10.4</i>  | 8.8                                   |
| <i>RNU4-1</i>        | 8.8                                   |
| <i>MAPK8IP2</i>      | 8.8                                   |
| <i>LINC01063</i>     | 8.8                                   |
| <i>CHAF1B</i>        | 8.8                                   |
| <i>RP11-66N24.7</i>  | 8.8                                   |
| <i>CCNE1</i>         | 8.8                                   |
| <i>RP1-102D24.5</i>  | 8.7                                   |
| <i>KCND2</i>         | 8.7                                   |
| <i>RP11-288C17.1</i> | 8.7                                   |
| <i>FOXD2-AS1</i>     | 8.7                                   |
| <i>RP11-254F7.1</i>  | 8.7                                   |
| <i>SNCAIP</i>        | 8.7                                   |
| <i>SYT7</i>          | 8.7                                   |
| <i>BRWD1-AS1</i>     | 8.7                                   |
| <i>NPPC</i>          | 8.7                                   |
| <i>HOXD8</i>         | 8.7                                   |
| <i>IZUMO2</i>        | 8.7                                   |
| <i>AC034110.1</i>    | 8.7                                   |
| <i>BAI1</i>          | 8.6                                   |
| <i>STMN1</i>         | 8.6                                   |

| <b>Gene Name</b>      | <b>Fold change relative to normal</b> |
|-----------------------|---------------------------------------|
| <i>RP11-500B12.1</i>  | 8.6                                   |
| <i>HTR3E</i>          | 8.6                                   |
| <i>RP11-368L12.1</i>  | 8.6                                   |
| <i>LL0XNC01-116E7</i> | 8.6                                   |
| <i>BTBD11</i>         | 8.6                                   |
| <i>LRRC16B</i>        | 8.6                                   |
| <i>LINC01121</i>      | 8.6                                   |
| <i>SERPINH1P1</i>     | 8.6                                   |
| <i>AC090945.1</i>     | 8.6                                   |
| <i>AC073043.1</i>     | 8.6                                   |
| <i>RP11-238F2.1</i>   | 8.6                                   |
| <i>VSX2</i>           | 8.6                                   |
| <i>RP5-890O15.3</i>   | 8.6                                   |
| <i>RP11-54D18.4</i>   | 8.6                                   |
| <i>RNU6-438P</i>      | 8.6                                   |
| <i>FAM71E2</i>        | 8.5                                   |
| <i>RP4-669H2.1</i>    | 8.5                                   |
| <i>MYO18B</i>         | 8.5                                   |
| <i>LGSN</i>           | 8.5                                   |
| <i>AC006262.5</i>     | 8.5                                   |
| <i>RP11-831F12.3</i>  | 8.5                                   |
| <i>WASIR2</i>         | 8.5                                   |
| <i>NTN3</i>           | 8.5                                   |
| <i>ADAMTS20</i>       | 8.5                                   |
| <i>DGKI</i>           | 8.5                                   |
| <i>RP11-536L3.4</i>   | 8.5                                   |
| <i>CDHR2</i>          | 8.5                                   |
| <i>LINC00471</i>      | 8.5                                   |
| <i>RP11-564D11.3</i>  | 8.5                                   |
| <i>CASKIN1</i>        | 8.4                                   |
| <i>RP11-554D20.2</i>  | 8.4                                   |
| <i>RP11-191L9.4</i>   | 8.4                                   |
| <i>PRDM12</i>         | 8.4                                   |
| <i>MTMR7</i>          | 8.4                                   |
| <i>RP11-374A4.1</i>   | 8.4                                   |
| <i>GPR173</i>         | 8.4                                   |
| <i>RP11-1145L24.1</i> | 8.4                                   |
| <i>SMPD3</i>          | 8.4                                   |
| <i>RNASEH2A</i>       | 8.4                                   |
| <i>ANLN</i>           | 8.4                                   |
| <i>CCDC168</i>        | 8.4                                   |
| <i>GRIK2</i>          | 8.4                                   |
| <i>RNF157</i>         | 8.4                                   |
| <i>RP11-434D9.2</i>   | 8.4                                   |
| <i>HCN2</i>           | 8.4                                   |
| <i>RP11-324L17.1</i>  | 8.3                                   |
| <i>MIAT</i>           | 8.3                                   |
| <i>RP11-245D16.4</i>  | 8.3                                   |
| <i>C7orf33</i>        | 8.3                                   |
| <i>CEP41</i>          | 8.3                                   |
| <i>CTD-2147F2.2</i>   | 8.3                                   |

| <b>Gene Name</b>     | <b>Fold change relative to normal</b> |
|----------------------|---------------------------------------|
| <i>SYCE2</i>         | 8.3                                   |
| <i>TYMS</i>          | 8.3                                   |
| <i>LINC01248</i>     | 8.3                                   |
| <i>RP11-32D17.4</i>  | 8.3                                   |
| <i>NEK2P4</i>        | 8.3                                   |
| <i>MCM4</i>          | 8.2                                   |
| <i>ARHGAP33</i>      | 8.2                                   |
| <i>RP11-384O8.1</i>  | 8.2                                   |
| <i>RP11-65M17.3</i>  | 8.2                                   |
| <i>MFI2-AS1</i>      | 8.2                                   |
| <i>RP11-513G11.2</i> | 8.2                                   |
| <i>SHISA9</i>        | 8.2                                   |
| <i>C1orf127</i>      | 8.2                                   |
| <i>TAS2R2P</i>       | 8.2                                   |
| <i>CHEK1</i>         | 8.2                                   |
| <i>COL11A1</i>       | 8.2                                   |
| <i>ZNF157</i>        | 8.2                                   |
| <i>RP11-1055B8.9</i> | 8.2                                   |
| <i>DMC1</i>          | 8.2                                   |
| <i>KCNA2</i>         | 8.2                                   |
| <i>CDC7</i>          | 8.2                                   |
| <i>KNTC1</i>         | 8.2                                   |
| <i>UBL4B</i>         | 8.2                                   |
| <i>MYCL</i>          | 8.2                                   |
| <i>RP11-100G15.7</i> | 8.2                                   |
| <i>AC104655.3</i>    | 8.2                                   |
| <i>AC097468.4</i>    | 8.2                                   |
| <i>FAM212B-AS1</i>   | 8.1                                   |
| <i>WDR76</i>         | 8.1                                   |
| <i>FATE1</i>         | 8.1                                   |
| <i>CTD-3099C6.9</i>  | 8.1                                   |
| <i>TAC3</i>          | 8.1                                   |
| <i>GRIN3A</i>        | 8.1                                   |
| <i>C2CD4C</i>        | 8.1                                   |
| <i>GNAZ</i>          | 8.1                                   |
| <i>FHOD3</i>         | 8.1                                   |
| <i>RP11-313C15.1</i> | 8.1                                   |
| <i>NTF3</i>          | 8.1                                   |
| <i>HIST1H4C</i>      | 8.1                                   |
| <i>XRCC6BP1</i>      | 8.1                                   |
| <i>RP11-381E24.1</i> | 8.1                                   |
| <i>AC004540.4</i>    | 8.1                                   |
| <i>RFC3</i>          | 8.0                                   |
| <i>RP11-173M1.5</i>  | 8.0                                   |
| <i>CST4</i>          | 8.0                                   |
| <i>RP11-944C7.1</i>  | 8.0                                   |
| <i>HIST2H3A</i>      | 8.0                                   |
| <i>RP11-93H24.3</i>  | 8.0                                   |
| <i>HOXB6</i>         | 8.0                                   |
| <i>AP001046.6</i>    | 8.0                                   |
| <i>RP11-646E18.4</i> | 8.0                                   |

| <b>Gene Name</b>     | <b>Fold change relative to normal</b> |
|----------------------|---------------------------------------|
| <i>DTL</i>           | 8.0                                   |
| <i>ARHGEF39</i>      | 8.0                                   |
| <i>RP5-983L19.2</i>  | 8.0                                   |
| <i>ENPP7P4</i>       | 8.0                                   |
| <i>RP4-565E6.1</i>   | 7.9                                   |
| <i>PIF1</i>          | 7.9                                   |
| <i>RP11-679B19.1</i> | 7.9                                   |
| <i>CENPE</i>         | 7.9                                   |
| <i>CKAP2</i>         | 7.9                                   |
| <i>AC084219.4</i>    | 7.9                                   |
| <i>MTCL1-AS1</i>     | 7.9                                   |
| <i>RNF182</i>        | 7.9                                   |
| <i>MIR137HG</i>      | 7.9                                   |
| <i>OTOF</i>          | 7.9                                   |
| <i>HIST1H2BB</i>     | 7.9                                   |
| <i>AHSG</i>          | 7.9                                   |
| <i>MARCKSL1</i>      | 7.9                                   |
| <i>RECQL4</i>        | 7.9                                   |
| <i>FLJ35934</i>      | 7.9                                   |
| <i>C17orf53</i>      | 7.9                                   |
| <i>EME1</i>          | 7.9                                   |
| <i>CKMT1A</i>        | 7.8                                   |
| <i>PCDHB9</i>        | 7.8                                   |
| <i>HOXB2</i>         | 7.8                                   |
| <i>RP1-127B20.4</i>  | 7.8                                   |
| <i>RP11-325N19.3</i> | 7.8                                   |
| <i>HIST1H2AD</i>     | 7.8                                   |
| <i>AWAT1</i>         | 7.8                                   |
| <i>TSACC</i>         | 7.8                                   |
| <i>CDK1</i>          | 7.8                                   |
| <i>PSRC1</i>         | 7.8                                   |
| <i>RP11-521B24.3</i> | 7.8                                   |
| <i>TIMELESS</i>      | 7.8                                   |
| <i>HTR1D</i>         | 7.8                                   |
| <i>PGAM1P7</i>       | 7.8                                   |
| <i>PRR11</i>         | 7.8                                   |
| <i>ZWINT</i>         | 7.8                                   |
| <i>RP11-496D24.2</i> | 7.8                                   |
| <i>ARG2</i>          | 7.8                                   |
| <i>RP11-284F21.7</i> | 7.8                                   |
| <i>SYNGR3</i>        | 7.8                                   |
| <i>HMGB3</i>         | 7.8                                   |
| <i>GINS4</i>         | 7.7                                   |
| <i>CEP55</i>         | 7.7                                   |
| <i>FAM178B</i>       | 7.7                                   |
| <i>SCAMP5</i>        | 7.7                                   |
| <i>LRRIQ4</i>        | 7.7                                   |
| <i>RP11-575L7.4</i>  | 7.7                                   |
| <i>BVES</i>          | 7.7                                   |
| <i>ACYP1</i>         | 7.7                                   |
| <i>DMRT3</i>         | 7.7                                   |

| <b>Gene Name</b>     | <b>Fold change relative to normal</b> |
|----------------------|---------------------------------------|
| <i>POF1B</i>         | 7.7                                   |
| <i>AC008079.9</i>    | 7.7                                   |
| <i>WDHD1</i>         | 7.7                                   |
| <i>RP11-402G3.3</i>  | 7.7                                   |
| <i>CTD-2540M10.1</i> | 7.7                                   |
| <i>RP11-390F4.10</i> | 7.7                                   |
| <i>PAFAH1B3</i>      | 7.7                                   |
| <i>MYCNOS</i>        | 7.7                                   |
| <i>RP11-680G10.1</i> | 7.7                                   |
| <i>ASPHD1</i>        | 7.7                                   |
| <i>DKFZP434H168</i>  | 7.6                                   |
| <i>RP3-407E4.4</i>   | 7.6                                   |
| <i>RP11-158H5.8</i>  | 7.6                                   |
| <i>MED12L</i>        | 7.6                                   |
| <i>MRAP2</i>         | 7.6                                   |
| <i>TRBV26OR9-2</i>   | 7.6                                   |
| <i>MTHFD1P1</i>      | 7.6                                   |
| <i>RPRM</i>          | 7.6                                   |
| <i>TET1</i>          | 7.6                                   |
| <i>GAL</i>           | 7.6                                   |
| <i>ESPN</i>          | 7.6                                   |
| <i>KRTAP10-6</i>     | 7.6                                   |
| <i>RP11-304L19.3</i> | 7.6                                   |
| <i>Metazoa_SRP</i>   | 7.6                                   |
| <i>RP5-850O15.3</i>  | 7.6                                   |
| <i>CPSF4L</i>        | 7.6                                   |
| <i>TMEM132D</i>      | 7.6                                   |
| <i>TMSB15B</i>       | 7.6                                   |
| <i>METTL11B</i>      | 7.6                                   |
| <i>RACGAP1</i>       | 7.6                                   |
| <i>SMIM24</i>        | 7.6                                   |
| <i>SNRPF2</i>        | 7.5                                   |
| <i>Six3os1_1</i>     | 7.5                                   |
| <i>snoU13</i>        | 7.5                                   |
| <i>C1orf111</i>      | 7.5                                   |
| <i>MYLK2</i>         | 7.5                                   |
| <i>BMP8B</i>         | 7.5                                   |
| <i>RP11-544I20.2</i> | 7.5                                   |
| <i>CXXC4</i>         | 7.5                                   |
| <i>FANCB</i>         | 7.5                                   |
| <i>SNORA70</i>       | 7.5                                   |
| <i>AF038458.5</i>    | 7.5                                   |
| <i>CALHM3</i>        | 7.5                                   |
| <i>C2orf48</i>       | 7.5                                   |
| <i>RP1-74M1.3</i>    | 7.5                                   |
| <i>TMPRSS3</i>       | 7.5                                   |
| <i>FLJ22184</i>      | 7.5                                   |
| <i>SNORA2</i>        | 7.5                                   |
| <i>PPIE</i>          | 7.5                                   |
| <i>ZNF883</i>        | 7.5                                   |
| <i>NLGN1</i>         | 7.5                                   |

| <b>Gene Name</b>     | <b>Fold change relative to normal</b> |
|----------------------|---------------------------------------|
| <i>DBH-AS1</i>       | 7.5                                   |
| <i>TMEM35</i>        | 7.4                                   |
| <i>GPR37L1</i>       | 7.4                                   |
| <i>MAP6D1</i>        | 7.4                                   |
| <i>GCM1</i>          | 7.4                                   |
| <i>MAPK8IP1</i>      | 7.4                                   |
| <i>MKRN9P</i>        | 7.4                                   |
| <i>AC092198.1</i>    | 7.4                                   |
| <i>AC024592.9</i>    | 7.4                                   |
| <i>CCDC150P1</i>     | 7.4                                   |
| <i>RP11-96H17.3</i>  | 7.4                                   |
| <i>GLYATL1P3</i>     | 7.4                                   |
| <i>ATXN8OS</i>       | 7.4                                   |
| <i>KHDC1</i>         | 7.4                                   |
| <i>STARD6</i>        | 7.4                                   |
| <i>CDCA7</i>         | 7.4                                   |
| <i>AL160471.6</i>    | 7.4                                   |
| <i>TDRD12</i>        | 7.4                                   |
| <i>OR1H1P</i>        | 7.3                                   |
| <i>RP11-746B8.1</i>  | 7.3                                   |
| <i>RP11-457M11.5</i> | 7.3                                   |
| <i>MSL3P1</i>        | 7.3                                   |
| <i>RP11-375B1.1</i>  | 7.3                                   |
| <i>KCNH4</i>         | 7.3                                   |
| <i>THEMIS3P</i>      | 7.3                                   |
| <i>AC007966.1</i>    | 7.3                                   |
| <i>CDT1</i>          | 7.3                                   |
| <i>SKP2</i>          | 7.3                                   |
| <i>CTD-2026G6.3</i>  | 7.3                                   |
| <i>AC004593.3</i>    | 7.3                                   |
| <i>KSR2</i>          | 7.3                                   |
| <i>SPIN4</i>         | 7.3                                   |
| <i>TMPO-AS1</i>      | 7.3                                   |
| <i>Six3os1_4</i>     | 7.3                                   |
| <i>CSTL1</i>         | 7.3                                   |
| <i>PCBP3</i>         | 7.3                                   |
| <i>EPHX4</i>         | 7.3                                   |
| <i>ENHO</i>          | 7.3                                   |
| <i>RMI2</i>          | 7.3                                   |
| <i>SV2C</i>          | 7.2                                   |
| <i>HIST2H2AB</i>     | 7.2                                   |
| <i>AC078864.2</i>    | 7.2                                   |
| <i>PKMYT1</i>        | 7.2                                   |
| <i>BIK</i>           | 7.2                                   |
| <i>NCAPG2</i>        | 7.2                                   |
| <i>RP11-480I12.5</i> | 7.2                                   |
| <i>LINC01102</i>     | 7.2                                   |
| <i>ATAD5</i>         | 7.2                                   |
| <i>CIB2</i>          | 7.2                                   |
| <i>CTC-340I23.2</i>  | 7.2                                   |
| <i>SSX2IP</i>        | 7.2                                   |

| <b>Gene Name</b>      | <b>Fold change relative to normal</b> |
|-----------------------|---------------------------------------|
| <i>KCNIP3</i>         | 7.2                                   |
| <i>CSMD2</i>          | 7.2                                   |
| <i>CEACAM7</i>        | 7.2                                   |
| <i>FTLP12</i>         | 7.2                                   |
| <i>RP11-332J15.2</i>  | 7.2                                   |
| <i>CCDC144CP</i>      | 7.2                                   |
| <i>MT3</i>            | 7.2                                   |
| <i>HYLS1</i>          | 7.1                                   |
| <i>RP13-685P2.8</i>   | 7.1                                   |
| <i>AC011242.6</i>     | 7.1                                   |
| <i>GEMIN8P4</i>       | 7.1                                   |
| <i>TBX15</i>          | 7.1                                   |
| <i>DISP2</i>          | 7.1                                   |
| <i>LINC00907</i>      | 7.1                                   |
| <i>CDKAL1</i>         | 7.1                                   |
| <i>GALNT8</i>         | 7.1                                   |
| <i>RP11-26M5.3</i>    | 7.1                                   |
| <i>KB-1836B5.1</i>    | 7.1                                   |
| <i>KCNH1-IT1</i>      | 7.1                                   |
| <i>LLNLR-268E12.1</i> | 7.1                                   |
| <i>RP11-5P18.10</i>   | 7.1                                   |
| <i>PLK4</i>           | 7.1                                   |
| <i>RP1-39G22.7</i>    | 7.1                                   |
| <i>HIST1H1E</i>       | 7.1                                   |
| <i>C3orf67</i>        | 7.1                                   |
| <i>RP5-928E24.4</i>   | 7.1                                   |
| <i>SV2B</i>           | 7.1                                   |
| <i>RP11-21A7A.4</i>   | 7.1                                   |
| <i>MTCL1</i>          | 7.1                                   |
| <i>LRRN1</i>          | 7.1                                   |
| <i>LINC00954</i>      | 7.1                                   |
| <i>CTD-2165H16.4</i>  | 7.1                                   |
| <i>RP11-111M22.4</i>  | 7.0                                   |
| <i>HOXD9</i>          | 7.0                                   |
| <i>RPL7AP26</i>       | 7.0                                   |
| <i>PRKRIRP8</i>       | 7.0                                   |
| <i>RP11-567G11.1</i>  | 7.0                                   |
| <i>BDH1</i>           | 7.0                                   |
| <i>RP11-22P6.3</i>    | 7.0                                   |
| <i>BNIP3P27</i>       | 7.0                                   |
| <i>ZNF92P3</i>        | 7.0                                   |
| <i>SH2D6</i>          | 7.0                                   |
| <i>RP11-70F11.8</i>   | 7.0                                   |
| <i>FOXD2</i>          | 7.0                                   |
| <i>HIST1H2AG</i>      | 7.0                                   |
| <i>ZCCHC18</i>        | 7.0                                   |
| <i>KPNA2</i>          | 7.0                                   |
| <i>TUBB8</i>          | 7.0                                   |
| <i>CARM1P1</i>        | 7.0                                   |
| <i>SGOL2</i>          | 7.0                                   |
| <i>FAM83C-AS1</i>     | 7.0                                   |



| <b>Gene Name</b>     | <b>Fold change relative to normal</b> |
|----------------------|---------------------------------------|
| <i>STMN3</i>         | 7.0                                   |
| <i>RP1-86C11.7</i>   | 7.0                                   |
| <i>FANCA</i>         | 7.0                                   |
| <i>LINC00661</i>     | 6.9                                   |
| <i>AC003682.17</i>   | 6.9                                   |
| <i>TMEM198</i>       | 6.9                                   |
| <i>C10orf90</i>      | 6.9                                   |
| <i>TCP10L</i>        | 6.9                                   |
| <i>RP11-2E11.5</i>   | 6.9                                   |
| <i>RP11-22B23.2</i>  | 6.9                                   |
| <i>ENC1</i>          | 6.9                                   |
| <i>DPY19L2P2</i>     | 6.9                                   |
| <i>GREB1</i>         | 6.9                                   |
| <i>AC092573.2</i>    | 6.9                                   |
| <i>TLL7-IT1</i>      | 6.9                                   |
| <i>AL158069.1</i>    | 6.9                                   |
| <i>PRC1-AS1</i>      | 6.9                                   |
| <i>RP11-421G1.2</i>  | 6.9                                   |
| <i>RP11-527L4.2</i>  | 6.9                                   |
| <i>HIST3H2BB</i>     | 6.9                                   |
| <i>CTD-2510F5.4</i>  | 6.9                                   |
| <i>PCDHA8</i>        | 6.9                                   |
| <i>KRT75</i>         | 6.9                                   |
| <i>LRP4-AS1</i>      | 6.9                                   |
| <i>NRIP3</i>         | 6.9                                   |
| <i>PNMA5</i>         | 6.9                                   |
| <i>RP11-423C15.3</i> | 6.9                                   |
| <i>ACTL6A</i>        | 6.9                                   |
| <i>ADPRHL1</i>       | 6.9                                   |
| <i>NUP62CL</i>       | 6.9                                   |
| <i>SMC2</i>          | 6.9                                   |
| <i>DCAF4L2</i>       | 6.8                                   |
| <i>RP11-573M3.3</i>  | 6.8                                   |
| <i>RPL39L</i>        | 6.8                                   |
| <i>ZBTB20-AS4</i>    | 6.8                                   |
| <i>FBXO5</i>         | 6.8                                   |
| <i>RP11-438D14.3</i> | 6.8                                   |
| <i>PCSK1N</i>        | 6.8                                   |
| <i>RP1-152L7.5</i>   | 6.8                                   |
| <i>C1orf234</i>      | 6.8                                   |
| <i>SYN2</i>          | 6.8                                   |
| <i>HNRNPCP4</i>      | 6.8                                   |
| <i>RASD2</i>         | 6.8                                   |
| <i>PAQR4</i>         | 6.8                                   |
| <i>AKAP8P1</i>       | 6.8                                   |
| <i>RP3-407E4.3</i>   | 6.8                                   |
| <i>HIST3H2BA</i>     | 6.8                                   |
| <i>GGH</i>           | 6.8                                   |
| <i>E2F1</i>          | 6.8                                   |
| <i>RP11-829H16.3</i> | 6.8                                   |
| <i>IGFBP5</i>        | 6.8                                   |

| <b>Gene Name</b>     | <b>Fold change relative to normal</b> |
|----------------------|---------------------------------------|
| <i>RP11-474P2.6</i>  | 6.8                                   |
| <i>PAK3</i>          | 6.8                                   |
| <i>RPL9P5</i>        | 6.8                                   |
| <i>ZNF705G</i>       | 6.8                                   |
| <i>DDN</i>           | 6.8                                   |
| <i>LINC01280</i>     | 6.8                                   |
| <i>SMCO2</i>         | 6.7                                   |
| <i>RP1-101D8.1</i>   | 6.7                                   |
| <i>RNFT2</i>         | 6.7                                   |
| <i>RAD51</i>         | 6.7                                   |
| <i>HOXB1</i>         | 6.7                                   |
| <i>FAM72D</i>        | 6.7                                   |
| <i>C3orf14</i>       | 6.7                                   |
| <i>CTD-2377O17.1</i> | 6.7                                   |
| <i>RP11-91H12.4</i>  | 6.7                                   |
| <i>CCDC28B</i>       | 6.7                                   |
| <i>ENO2</i>          | 6.7                                   |
| <i>HIST1H3I</i>      | 6.7                                   |
| <i>STRCP1</i>        | 6.7                                   |
| <i>HIST2H4A</i>      | 6.7                                   |
| <i>SMKR1</i>         | 6.7                                   |
| <i>TDGF1P7</i>       | 6.7                                   |
| <i>WSCD1</i>         | 6.7                                   |
| <i>HIST1H4L</i>      | 6.7                                   |
| <i>AC079610.2</i>    | 6.7                                   |
| <i>TMEM61</i>        | 6.7                                   |
| <i>ADAMTS14</i>      | 6.7                                   |
| <i>LINC01342</i>     | 6.7                                   |
| <i>TRIT1</i>         | 6.6                                   |
| <i>MESTP1</i>        | 6.6                                   |
| <i>RP11-353N14.5</i> | 6.6                                   |
| <i>SPP1</i>          | 6.6                                   |
| <i>HOXC4</i>         | 6.6                                   |
| <i>RIMS4</i>         | 6.6                                   |
| <i>RP11-114H23.2</i> | 6.6                                   |
| <i>FEN1</i>          | 6.6                                   |
| <i>RP11-542G1.1</i>  | 6.6                                   |
| <i>C2CD4A</i>        | 6.6                                   |
| <i>RP5-1017F8.2</i>  | 6.6                                   |
| <i>BCAN</i>          | 6.6                                   |
| <i>AC133680.1</i>    | 6.6                                   |
| <i>CTC-273B12.10</i> | 6.6                                   |
| <i>VANGL2</i>        | 6.6                                   |
| <i>AC002310.17</i>   | 6.6                                   |
| <i>TSPEAR</i>        | 6.6                                   |
| <i>CCNF</i>          | 6.6                                   |
| <i>FAM81A</i>        | 6.6                                   |
| <i>FAR2P2</i>        | 6.6                                   |
| <i>DFNB31</i>        | 6.6                                   |
| <i>IGSF9B</i>        | 6.6                                   |
| <i>WNT11</i>         | 6.6                                   |

| <b>Gene Name</b> | <b>Fold change relative to normal</b> |
|------------------|---------------------------------------|
| AC120042.1       | 6.6                                   |
| AC104088.1       | 6.5                                   |
| APOBEC3B         | 6.5                                   |
| HMGB3P6          | 6.5                                   |
| KIAA1211         | 6.5                                   |
| ZNF878           | 6.5                                   |
| RP11-30L15.4     | 6.5                                   |
| LL09NC01-139C3   | 6.5                                   |
| RP11-154J22.1    | 6.5                                   |
| RP11-111M22.2    | 6.5                                   |
| RP6-191P20.5     | 6.5                                   |
| KIRREL3-AS2      | 6.5                                   |
| RP4-621N11.2     | 6.5                                   |
| RP11-410N8.4     | 6.5                                   |
| RP11-166D18.1    | 6.5                                   |
| C9orf163         | 6.5                                   |
| CLIP3            | 6.5                                   |
| MTL5             | 6.5                                   |
| CENPW            | 6.5                                   |
| CTD-2083E4.4     | 6.5                                   |
| AC105402.2       | 6.5                                   |
| PCDHB10          | 6.4                                   |
| CENPV            | 6.4                                   |
| RP11-586D19.1    | 6.4                                   |
| RP11-146F11.5    | 6.4                                   |
| HOXB3            | 6.4                                   |
| RP11-565P22.2    | 6.4                                   |
| MEX3B            | 6.4                                   |
| SYT11            | 6.4                                   |
| ARNTL2           | 6.4                                   |
| VAX2             | 6.4                                   |
| DDX12P           | 6.4                                   |
| FBLN7            | 6.4                                   |
| ARHGEF7-AS2      | 6.4                                   |
| TXNDC16          | 6.4                                   |
| RNF165           | 6.4                                   |
| SLC35G2          | 6.4                                   |
| RNU6-678P        | 6.4                                   |
| FAM27E3          | 6.4                                   |
| RP11-351C21.2    | 6.4                                   |
| CPLX1            | 6.4                                   |
| PCNA             | 6.4                                   |
| RP11-484K9.4     | 6.4                                   |
| ARHGAP19-SLIT1   | 6.4                                   |
| SLC13A3          | 6.4                                   |
| AL121578.2       | 6.3                                   |
| SLC7A9           | 6.3                                   |
| CCDC154          | 6.3                                   |
| KALRN            | 6.3                                   |
| RP11-269C23.5    | 6.3                                   |
| RP11-317P15.4    | 6.3                                   |

| <b>Gene Name</b>      | <b>Fold change relative to normal</b> |
|-----------------------|---------------------------------------|
| <i>HIST1H4K</i>       | 6.3                                   |
| <i>FAM131B</i>        | 6.3                                   |
| <i>CTD-2620I22.3</i>  | 6.3                                   |
| <i>KRT80</i>          | 6.3                                   |
| <i>C19orf57</i>       | 6.3                                   |
| <i>ANKRD18A</i>       | 6.3                                   |
| <i>ZNF252P-AS1</i>    | 6.3                                   |
| <i>B4GALT6</i>        | 6.3                                   |
| <i>GMNN</i>           | 6.3                                   |
| <i>CDH8</i>           | 6.3                                   |
| <i>CIART</i>          | 6.3                                   |
| <i>CDCA4</i>          | 6.3                                   |
| <i>MPP2</i>           | 6.3                                   |
| <i>RP11-687F6.5</i>   | 6.3                                   |
| <i>CTD-2340E1.2</i>   | 6.3                                   |
| <i>RNU2-22P</i>       | 6.3                                   |
| <i>RP11-480G7.2</i>   | 6.3                                   |
| <i>RP11-44N12.5</i>   | 6.2                                   |
| <i>RP11-687F6.1</i>   | 6.2                                   |
| <i>EPHA10</i>         | 6.2                                   |
| <i>OR1J1</i>          | 6.2                                   |
| <i>KIAA0101</i>       | 6.2                                   |
| <i>MTBP</i>           | 6.2                                   |
| <i>RP11-132A1.6</i>   | 6.2                                   |
| <i>HIST2H2BC</i>      | 6.2                                   |
| <i>RP11-115C10.1</i>  | 6.2                                   |
| <i>KIF18A</i>         | 6.2                                   |
| <i>GAREML</i>         | 6.2                                   |
| <i>VASH2</i>          | 6.2                                   |
| <i>MAPK6PS3</i>       | 6.2                                   |
| <i>RP11-34F20.7</i>   | 6.2                                   |
| <i>GFRA4</i>          | 6.2                                   |
| <i>SNAP25-AS1</i>     | 6.2                                   |
| <i>RP4-738P11.4</i>   | 6.2                                   |
| <i>GNRH2</i>          | 6.2                                   |
| <i>AC097468.7</i>     | 6.2                                   |
| <i>SCRT1</i>          | 6.2                                   |
| <i>RP11-680F20.10</i> | 6.2                                   |
| <i>HOXD3</i>          | 6.2                                   |
| <i>IL12RB2</i>        | 6.2                                   |
| <i>RAD54B</i>         | 6.2                                   |
| <i>ASPDH</i>          | 6.2                                   |
| <i>SLC36A4</i>        | 6.2                                   |
| <i>RP11-231I16.1</i>  | 6.2                                   |
| <i>SDK2</i>           | 6.2                                   |
| <i>MSI2</i>           | 6.2                                   |
| <i>RP11-430E17.1</i>  | 6.1                                   |
| <i>IPO9-AS1</i>       | 6.1                                   |
| <i>TRIM36</i>         | 6.1                                   |
| <i>PRTFDC1</i>        | 6.1                                   |
| <i>MDK</i>            | 6.1                                   |

| <b>Gene Name</b>      | <b>Fold change relative to normal</b> |
|-----------------------|---------------------------------------|
| <i>FLJ12825</i>       | 6.1                                   |
| <i>PSIP1</i>          | 6.1                                   |
| <i>SLC16A14</i>       | 6.1                                   |
| <i>CHRM5</i>          | 6.1                                   |
| <i>RHEBL1</i>         | 6.1                                   |
| <i>PDZD4</i>          | 6.1                                   |
| <i>KLHL23</i>         | 6.1                                   |
| <i>CKS1B</i>          | 6.1                                   |
| <i>AC023593.1</i>     | 6.1                                   |
| <i>DIRAS1</i>         | 6.1                                   |
| <i>LINC01132</i>      | 6.1                                   |
| <i>FANCG</i>          | 6.1                                   |
| <i>ABLIM2</i>         | 6.1                                   |
| <i>IZUMO4</i>         | 6.1                                   |
| <i>OVOL3</i>          | 6.1                                   |
| <i>AC073415.2</i>     | 6.1                                   |
| <i>CTD-2349P21.6</i>  | 6.1                                   |
| <i>GDAP1</i>          | 6.0                                   |
| <i>RMI1</i>           | 6.0                                   |
| <i>CTD-3105H18.9</i>  | 6.0                                   |
| <i>SPTBN2</i>         | 6.0                                   |
| <i>RBP1</i>           | 6.0                                   |
| <i>OR13A1</i>         | 6.0                                   |
| <i>RP11-174O3.3</i>   | 6.0                                   |
| <i>HOXB7</i>          | 6.0                                   |
| <i>KLF1</i>           | 6.0                                   |
| <i>HFM1</i>           | 6.0                                   |
| <i>C15orf41</i>       | 6.0                                   |
| <i>NHS</i>            | 6.0                                   |
| <i>C9orf84</i>        | 6.0                                   |
| <i>FAIM2</i>          | 6.0                                   |
| <i>TLL2</i>           | 6.0                                   |
| <i>RP11-38J22.3</i>   | 6.0                                   |
| <i>TMEM169</i>        | 6.0                                   |
| <i>AC007204.2</i>     | 6.0                                   |
| <i>LCT</i>            | 6.0                                   |
| <i>HIST1H3D</i>       | 6.0                                   |
| <i>AL353997.3</i>     | 6.0                                   |
| <i>RP11-143K11.5</i>  | 6.0                                   |
| <i>RP11-7I15.4</i>    | 6.0                                   |
| <i>GRIP1</i>          | 5.9                                   |
| <i>FAM72A</i>         | 5.9                                   |
| <i>ARTN</i>           | 5.9                                   |
| <i>MEGF11</i>         | 5.9                                   |
| <i>RP11-634H22.1</i>  | 5.9                                   |
| <i>AC004158.2</i>     | 5.9                                   |
| <i>OXCT1</i>          | 5.9                                   |
| <i>RP5-842K16.1</i>   | 5.9                                   |
| <i>CTD-3222D19.12</i> | 5.9                                   |
| <i>CTD-3149D2.3</i>   | 5.9                                   |
| <i>SNORA81</i>        | 5.9                                   |

| <b>Gene Name</b>      | <b>Fold change relative to normal</b> |
|-----------------------|---------------------------------------|
| <i>RP11-428P16.2</i>  | 5.9                                   |
| <i>AK4</i>            | 5.9                                   |
| <i>CTC-453G23.5</i>   | 5.9                                   |
| <i>AP001626.2</i>     | 5.9                                   |
| <i>FGF9</i>           | 5.9                                   |
| <i>RP11-190P13.1</i>  | 5.9                                   |
| <i>HOXA11</i>         | 5.9                                   |
| <i>RP4-536B24.3</i>   | 5.9                                   |
| <i>CRHR2</i>          | 5.9                                   |
| <i>RP11-307O13.1</i>  | 5.9                                   |
| <i>C19orf48</i>       | 5.9                                   |
| <i>SPTBN4</i>         | 5.9                                   |
| <i>HIST1H2AH</i>      | 5.9                                   |
| <i>RP11-728F11.4</i>  | 5.9                                   |
| <i>FAM3B</i>          | 5.9                                   |
| <i>RP11-142E9.1</i>   | 5.9                                   |
| <i>ASNS</i>           | 5.9                                   |
| <i>RP11-977B10.2</i>  | 5.8                                   |
| <i>FGF17</i>          | 5.8                                   |
| <i>MCM6</i>           | 5.8                                   |
| <i>SH2D7</i>          | 5.8                                   |
| <i>RP11-192N10.2</i>  | 5.8                                   |
| <i>RP11-161H23.10</i> | 5.8                                   |
| <i>CALHM1</i>         | 5.8                                   |
| <i>RPL31P61</i>       | 5.8                                   |
| <i>UCK2</i>           | 5.8                                   |
| <i>RP11-895M11.2</i>  | 5.8                                   |
| <i>RP11-98D18.9</i>   | 5.8                                   |
| <i>RP11-973D8.5</i>   | 5.8                                   |
| <i>RP11-95O2.1</i>    | 5.8                                   |
| <i>ZFP69B</i>         | 5.8                                   |
| <i>QPCT</i>           | 5.8                                   |
| <i>TMEM132A</i>       | 5.8                                   |
| <i>DSCC1</i>          | 5.8                                   |
| <i>PLSCR2</i>         | 5.8                                   |
| <i>TUBA1A</i>         | 5.8                                   |
| <i>CTC-327F10.4</i>   | 5.8                                   |
| <i>BRCA1</i>          | 5.8                                   |
| <i>RP11-91I20.2</i>   | 5.8                                   |
| <i>RP11-114H23.1</i>  | 5.8                                   |
| <i>RP11-168F9.2</i>   | 5.8                                   |
| <i>ATAD2</i>          | 5.8                                   |
| <i>TBCAP2</i>         | 5.8                                   |
| <i>RP11-142A23.1</i>  | 5.8                                   |
| <i>NYAP1</i>          | 5.7                                   |
| <i>GPR61</i>          | 5.7                                   |
| <i>SALL4</i>          | 5.7                                   |
| <i>IL17RD</i>         | 5.7                                   |
| <i>MAD2L2</i>         | 5.7                                   |
| <i>GSG2</i>           | 5.7                                   |
| <i>TMEM179</i>        | 5.7                                   |

| <b>Gene Name</b>      | <b>Fold change relative to normal</b> |
|-----------------------|---------------------------------------|
| <i>RASL11B</i>        | 5.7                                   |
| <i>RP11-159D12.11</i> | 5.7                                   |
| <i>TMEM106C</i>       | 5.7                                   |
| <i>ARHGEF7-AS1</i>    | 5.7                                   |
| <i>C1orf112</i>       | 5.7                                   |
| <i>MYOM3</i>          | 5.7                                   |
| <i>SOX4</i>           | 5.7                                   |
| <i>SPTB</i>           | 5.7                                   |
| <i>CTD-2256P15.2</i>  | 5.7                                   |
| <i>RIMKLA</i>         | 5.7                                   |
| <i>KIF3C</i>          | 5.7                                   |
| <i>RP11-572C21.1</i>  | 5.7                                   |
| <i>ADARB2</i>         | 5.7                                   |
| <i>DNM1</i>           | 5.7                                   |
| <i>TFDP1</i>          | 5.7                                   |
| <i>ZNF840</i>         | 5.7                                   |
| <i>AC093375.1</i>     | 5.6                                   |
| <i>HNRNPA3P9</i>      | 5.6                                   |
| <i>AC010980.2</i>     | 5.6                                   |
| <i>Y_RNA</i>          | 5.6                                   |
| <i>RP11-55K13.1</i>   | 5.6                                   |
| <i>MND1</i>           | 5.6                                   |
| <i>PDCL2</i>          | 5.6                                   |
| <i>TARDBPP2</i>       | 5.6                                   |
| <i>DNA2</i>           | 5.6                                   |
| <i>GGTA2P</i>         | 5.6                                   |
| <i>CKS1BP7</i>        | 5.6                                   |
| <i>RP11-319E16.2</i>  | 5.6                                   |
| <i>SNORA70</i>        | 5.6                                   |
| <i>RP11-267D19.2</i>  | 5.6                                   |
| <i>RP11-20I20.1</i>   | 5.6                                   |
| <i>RP11-441F2.2</i>   | 5.6                                   |
| <i>ACAN</i>           | 5.6                                   |
| <i>CCDC136</i>        | 5.6                                   |
| <i>FBXL16</i>         | 5.6                                   |
| <i>AC092835.2</i>     | 5.6                                   |
| <i>FZD3</i>           | 5.6                                   |
| <i>RP4-758J18.13</i>  | 5.6                                   |
| <i>AF038458.3</i>     | 5.6                                   |
| <i>RP11-80H5.2</i>    | 5.6                                   |
| <i>CRYGN</i>          | 5.6                                   |
| <i>RNU2-11P</i>       | 5.6                                   |
| <i>C16orf92</i>       | 5.5                                   |
| <i>WIPF3</i>          | 5.5                                   |
| <i>RP11-739L10.1</i>  | 5.5                                   |
| <i>RP11-781A6.1</i>   | 5.5                                   |
| <i>RHCE</i>           | 5.5                                   |
| <i>CBFA2T2</i>        | 5.5                                   |
| <i>AC003088.1</i>     | 5.5                                   |
| <i>RP11-465B22.8</i>  | 5.5                                   |
| <i>RETNLB</i>         | 5.5                                   |

| <b>Gene Name</b> | <b>Fold change relative to normal</b> |
|------------------|---------------------------------------|
| AC004381.6       | 5.5                                   |
| RPS6KA6          | 5.5                                   |
| RP11-707O23.5    | 5.5                                   |
| RNA5SP323        | 5.5                                   |
| DDX11            | 5.5                                   |
| Six3os1_5        | 5.5                                   |
| TCTEX1D2         | 5.5                                   |
| RP11-421M1.8     | 5.5                                   |
| AC006116.21      | 5.5                                   |
| PRPH             | 5.5                                   |
| FAM60CP          | 5.5                                   |
| RRM1             | 5.5                                   |
| LINC00594        | 5.5                                   |
| NAALADL2-AS2     | 5.5                                   |
| NPM2             | 5.5                                   |
| AC105402.3       | 5.5                                   |
| GPRC5B           | 5.5                                   |
| RP11-173B14.4    | 5.5                                   |
| NMNAT3           | 5.5                                   |
| RP5-940J5.3      | 5.5                                   |
| BARD1            | 5.4                                   |
| DIAPH3           | 5.4                                   |
| TRAIP            | 5.4                                   |
| KCNB1            | 5.4                                   |
| YEATS2-AS1       | 5.4                                   |
| LINC00683        | 5.4                                   |
| CENPL            | 5.4                                   |
| MKRN7P           | 5.4                                   |
| ARHGAP11A        | 5.4                                   |
| RP11-133K1.7     | 5.4                                   |
| HMGB2            | 5.4                                   |
| MCM8             | 5.4                                   |
| FGD1             | 5.4                                   |
| CTD-2210P15.2    | 5.4                                   |
| HRASLS           | 5.4                                   |
| LINC01206        | 5.4                                   |
| ARID3C           | 5.4                                   |
| RP11-98D18.1     | 5.4                                   |
| RP11-175P19.2    | 5.4                                   |
| GS1-279B7.1      | 5.4                                   |
| CDKN2B-AS1       | 5.4                                   |
| CTD-2116N20.1    | 5.4                                   |
| RP11-108M9.3     | 5.4                                   |
| AC073321.4       | 5.4                                   |
| C9orf40          | 5.4                                   |
| RP11-18B3.2      | 5.4                                   |
| HIF1A-AS1        | 5.4                                   |
| RP11-369G6.2     | 5.4                                   |
| RP5-1033H22.2    | 5.4                                   |
| LINC00652        | 5.4                                   |
| RP11-809H16.3    | 5.4                                   |



| <b>Gene Name</b>      | <b>Fold change relative to normal</b> |
|-----------------------|---------------------------------------|
| <i>SLC12A5</i>        | 5.4                                   |
| <i>RP11-168O16.1</i>  | 5.4                                   |
| <i>CPE</i>            | 5.3                                   |
| <i>RP5-1074L1.4</i>   | 5.3                                   |
| <i>CTD-2582D11.1</i>  | 5.3                                   |
| <i>AGPAT5</i>         | 5.3                                   |
| <i>PPAT</i>           | 5.3                                   |
| <i>RP11-230B22.1</i>  | 5.3                                   |
| <i>FIGNL1</i>         | 5.3                                   |
| <i>RP11-343N15.2</i>  | 5.3                                   |
| <i>RNU7-75P</i>       | 5.3                                   |
| <i>RP11-626I20.3</i>  | 5.3                                   |
| <i>RP11-594N15.2</i>  | 5.3                                   |
| <i>PYCR1</i>          | 5.3                                   |
| <i>CKM</i>            | 5.3                                   |
| <i>POLA1</i>          | 5.3                                   |
| <i>PTGES3L</i>        | 5.3                                   |
| <i>RP11-168A11.4</i>  | 5.3                                   |
| <i>C12orf75</i>       | 5.3                                   |
| <i>DONSON</i>         | 5.3                                   |
| <i>MMS22L</i>         | 5.3                                   |
| <i>GPSM2</i>          | 5.3                                   |
| <i>IQCC</i>           | 5.3                                   |
| <i>CEP97</i>          | 5.3                                   |
| <i>RP6-65G23.3</i>    | 5.3                                   |
| <i>LINC00925</i>      | 5.3                                   |
| <i>RAC3</i>           | 5.3                                   |
| <i>LL0XNC01-116E7</i> | 5.3                                   |
| <i>NT5M</i>           | 5.3                                   |
| <i>PCLO</i>           | 5.3                                   |
| <i>RP11-53B5.1</i>    | 5.3                                   |
| <i>PCYT1B</i>         | 5.3                                   |
| <i>AC011747.3</i>     | 5.3                                   |
| <i>MRPL23-AS1</i>     | 5.3                                   |
| <i>AC011747.4</i>     | 5.3                                   |
| <i>RP11-53I6.4</i>    | 5.2                                   |
| <i>FAM161A</i>        | 5.2                                   |
| <i>RP11-406D1.2</i>   | 5.2                                   |
| <i>RP1-228H13.5</i>   | 5.2                                   |
| <i>RP11-266L9.1</i>   | 5.2                                   |
| <i>MAP2</i>           | 5.2                                   |
| <i>TAS2R38</i>        | 5.2                                   |
| <i>CHN2</i>           | 5.2                                   |
| <i>GLYATL1P4</i>      | 5.2                                   |
| <i>TOPBP1</i>         | 5.2                                   |
| <i>CTC-453G23.4</i>   | 5.2                                   |
| <i>PHGDH</i>          | 5.2                                   |
| <i>CTXN2</i>          | 5.2                                   |
| <i>PRR19</i>          | 5.2                                   |
| <i>RAB6B</i>          | 5.2                                   |
| <i>BMP8A</i>          | 5.2                                   |

| <b>Gene Name</b>      | <b>Fold change relative to normal</b> |
|-----------------------|---------------------------------------|
| <i>CLTCL1</i>         | 5.2                                   |
| <i>AC004076.5</i>     | 5.2                                   |
| <i>AC093388.3</i>     | 5.2                                   |
| <i>RP11-157D18.2</i>  | 5.2                                   |
| <i>RP11-71H17.1</i>   | 5.2                                   |
| <i>AC073621.2</i>     | 5.2                                   |
| <i>RP11-188D8.1</i>   | 5.2                                   |
| <i>BCYRN1</i>         | 5.2                                   |
| <i>AC012360.4</i>     | 5.2                                   |
| <i>FAM60BP</i>        | 5.2                                   |
| <i>TMEM194A</i>       | 5.2                                   |
| <i>RP11-210N13.1</i>  | 5.2                                   |
| <i>AF064860.5</i>     | 5.2                                   |
| <i>AC069257.6</i>     | 5.2                                   |
| <i>HOXA-AS3</i>       | 5.2                                   |
| <i>SMC4</i>           | 5.1                                   |
| <i>ADAMTSL1</i>       | 5.1                                   |
| <i>AC022182.2</i>     | 5.1                                   |
| <i>PPP1R14D</i>       | 5.1                                   |
| <i>RP11-814H16.2</i>  | 5.1                                   |
| <i>RP11-307L3.4</i>   | 5.1                                   |
| <i>CADM4</i>          | 5.1                                   |
| <i>RP11-243J16.8</i>  | 5.1                                   |
| <i>ZDHHC13</i>        | 5.1                                   |
| <i>RPS6KL1</i>        | 5.1                                   |
| <i>RP11-27N21.3</i>   | 5.1                                   |
| <i>LL0XNC01-116E7</i> | 5.1                                   |
| <i>CRHR1-IT1</i>      | 5.1                                   |
| <i>MURC</i>           | 5.1                                   |
| <i>RP11-701I24.3</i>  | 5.1                                   |
| <i>FMR1-AS1</i>       | 5.1                                   |
| <i>RP11-434D11.4</i>  | 5.1                                   |
| <i>APBA2</i>          | 5.1                                   |
| <i>LINC01399</i>      | 5.1                                   |
| <i>MAGEA8</i>         | 5.1                                   |
| <i>NRTN</i>           | 5.1                                   |
| <i>CCDC64</i>         | 5.1                                   |
| <i>TMEM59L</i>        | 5.1                                   |
| <i>ECE2</i>           | 5.1                                   |
| <i>TMPO</i>           | 5.1                                   |
| <i>MFSD6L</i>         | 5.1                                   |
| <i>ZNF738</i>         | 5.1                                   |
| <i>ADAM11</i>         | 5.1                                   |
| <i>CHAF1A</i>         | 5.1                                   |
| <i>HNRNPA1P16</i>     | 5.1                                   |
| <i>RP11-696L21.2</i>  | 5.1                                   |
| <i>AC068831.16</i>    | 5.1                                   |
| <i>RP11-332J15.3</i>  | 5.1                                   |
| <i>RP11-621H8.2</i>   | 5.1                                   |
| <i>CACNA1C-AS1</i>    | 5.0                                   |
| <i>RP11-334C17.6</i>  | 5.0                                   |

| <b>Gene Name</b>     | <b>Fold change relative to normal</b> |
|----------------------|---------------------------------------|
| <i>RASGEF1C</i>      | 5.0                                   |
| <i>RP11-421E14.2</i> | 5.0                                   |
| <i>SALL4P7</i>       | 5.0                                   |
| <i>EMC3-AS1</i>      | 5.0                                   |
| <i>RP11-63N3.1</i>   | 5.0                                   |
| <i>AC020915.2</i>    | 5.0                                   |
| <i>LINC00337</i>     | 5.0                                   |
| <i>SLC7A4</i>        | 5.0                                   |
| <i>FLJ37201</i>      | 5.0                                   |
| <i>KLC3</i>          | 5.0                                   |
| <i>CERS6</i>         | 5.0                                   |
| <i>LAGE3P1</i>       | 5.0                                   |
| <i>SPP2</i>          | 5.0                                   |
| <i>MPHOSPH9</i>      | 5.0                                   |
| <i>RP5-836N17.4</i>  | 5.0                                   |
| <i>RP11-260M19.2</i> | 5.0                                   |
| <i>PROX1-AS1</i>     | 5.0                                   |
| <i>CEP85</i>         | 5.0                                   |
| <i>HMGA1P8</i>       | 5.0                                   |
| <i>PLEK2</i>         | 5.0                                   |
| <i>CTD-2529O21.1</i> | 5.0                                   |
| <i>BEX2</i>          | 5.0                                   |
| <i>SNORA47</i>       | 5.0                                   |
| <i>RP1-80N2.3</i>    | 5.0                                   |
| <i>RP11-346J10.2</i> | 5.0                                   |
| <i>SLMO1</i>         | 5.0                                   |
| <i>EIF3EP1</i>       | 5.0                                   |
| <i>LINC00618</i>     | 5.0                                   |
| <i>SNORA70</i>       | 5.0                                   |
| <i>CTD-2562G15.3</i> | 5.0                                   |
| <i>PCDHB3</i>        | 5.0                                   |
| <i>STK32A</i>        | 5.0                                   |
| <i>PRIM1</i>         | 5.0                                   |
| <i>HOXB-AS1</i>      | 5.0                                   |
| <i>STAM-AS1</i>      | 5.0                                   |
| <i>RP11-546B8.5</i>  | 5.0                                   |
| <i>C16orf47</i>      | 5.0                                   |
| <i>PSD</i>           | 4.9                                   |
| <i>RP13-395E19.2</i> | 4.9                                   |
| <i>AC018705.5</i>    | 4.9                                   |
| <i>RP5-1120P11.1</i> | 4.9                                   |
| <i>TEX30</i>         | 4.9                                   |
| <i>C4orf46</i>       | 4.9                                   |
| <i>RP5-908M14.10</i> | 4.9                                   |
| <i>LARP1P1</i>       | 4.9                                   |
| <i>RP11-95G17.2</i>  | 4.9                                   |
| <i>RP11-798M19.3</i> | 4.9                                   |
| <i>FRAS1</i>         | 4.9                                   |
| <i>HIST1H2AB</i>     | 4.9                                   |
| <i>AC078864.1</i>    | 4.9                                   |
| <i>CTD-2521M24.6</i> | 4.9                                   |

| <b>Gene Name</b>      | <b>Fold change relative to normal</b> |
|-----------------------|---------------------------------------|
| <i>PMAIP1</i>         | 4.9                                   |
| <i>RP11-649A18.4</i>  | 4.9                                   |
| <i>ZP3</i>            | 4.9                                   |
| <i>CTD-2105E13.16</i> | 4.9                                   |
| <i>LIG1</i>           | 4.9                                   |
| <i>SLFN13</i>         | 4.9                                   |
| <i>EPHB2</i>          | 4.9                                   |
| <i>RP11-404P21.3</i>  | 4.9                                   |
| <i>RP11-599J14.2</i>  | 4.9                                   |
| <i>NUAK1</i>          | 4.9                                   |
| <i>AC140481.8</i>     | 4.9                                   |
| <i>CTC-276P9.4</i>    | 4.9                                   |
| <i>MYEF2</i>          | 4.9                                   |
| <i>FRMPD3</i>         | 4.9                                   |
| <i>ZNF530</i>         | 4.9                                   |
| <i>IL22RA1</i>        | 4.9                                   |
| <i>SRCRB4D</i>        | 4.9                                   |
| <i>RP11-393I2.4</i>   | 4.9                                   |
| <i>RAB19</i>          | 4.9                                   |
| <i>ANO9</i>           | 4.9                                   |
| <i>ATP8A2</i>         | 4.9                                   |
| <i>C4orf50</i>        | 4.9                                   |
| <i>SLC7A11</i>        | 4.9                                   |
| <i>C21orf58</i>       | 4.9                                   |
| <i>TRIM46</i>         | 4.9                                   |
| <i>ZNF713</i>         | 4.9                                   |
| <i>DLEU2</i>          | 4.9                                   |
| <i>HOXB4</i>          | 4.8                                   |
| <i>RFC5</i>           | 4.8                                   |
| <i>FETUB</i>          | 4.8                                   |
| <i>FAXC</i>           | 4.8                                   |
| <i>HMGN2P4</i>        | 4.8                                   |
| <i>ASS1P2</i>         | 4.8                                   |
| <i>RP11-635N19.2</i>  | 4.8                                   |
| <i>AC015933.2</i>     | 4.8                                   |
| <i>GPR63</i>          | 4.8                                   |
| <i>CGREF1</i>         | 4.8                                   |
| <i>RP11-13K12.1</i>   | 4.8                                   |
| <i>RP3-486I3.7</i>    | 4.8                                   |
| <i>SUV39H2</i>        | 4.8                                   |
| <i>GOLGA7B</i>        | 4.8                                   |
| <i>FSD1L</i>          | 4.8                                   |
| <i>ATP6V0E2-AS1</i>   | 4.8                                   |
| <i>BRI3BP</i>         | 4.8                                   |
| <i>RPL18P10</i>       | 4.8                                   |
| <i>TMCC2</i>          | 4.8                                   |
| <i>KATNAL2</i>        | 4.8                                   |
| <i>ZNF625</i>         | 4.8                                   |
| <i>NR0B2</i>          | 4.8                                   |
| <i>MYRIP</i>          | 4.8                                   |
| <i>ANKRD13B</i>       | 4.8                                   |

| <b>Gene Name</b>      | <b>Fold change relative to normal</b> |
|-----------------------|---------------------------------------|
| <i>NUP155</i>         | 4.8                                   |
| <i>RP3-428L16.2</i>   | 4.8                                   |
| <i>HIST1H2BE</i>      | 4.8                                   |
| <i>CEP78</i>          | 4.8                                   |
| <i>RNF6P1</i>         | 4.8                                   |
| <i>SLC29A4</i>        | 4.8                                   |
| <i>CELSR2</i>         | 4.8                                   |
| <i>HSF2BP</i>         | 4.8                                   |
| <i>SYNJ2</i>          | 4.8                                   |
| <i>RP11-342A23.1</i>  | 4.8                                   |
| <i>RP3-322G13.7</i>   | 4.8                                   |
| <i>RP11-849F2.7</i>   | 4.8                                   |
| <i>OLIG3</i>          | 4.8                                   |
| <i>MESP1</i>          | 4.8                                   |
| <i>YWHAZP4</i>        | 4.8                                   |
| <i>RP11-489G11.3</i>  | 4.8                                   |
| <i>RP11-383I23.2</i>  | 4.8                                   |
| <i>LZTS1</i>          | 4.8                                   |
| <i>AC159540.2</i>     | 4.8                                   |
| <i>DNMT3B</i>         | 4.8                                   |
| <i>DSP</i>            | 4.8                                   |
| <i>CTHRC1</i>         | 4.7                                   |
| <i>RP11-94H18.1</i>   | 4.7                                   |
| <i>SKA2</i>           | 4.7                                   |
| <i>INCENP</i>         | 4.7                                   |
| <i>SRD5A1</i>         | 4.7                                   |
| <i>RP11-312J18.5</i>  | 4.7                                   |
| <i>GLP1R</i>          | 4.7                                   |
| <i>ADCY5</i>          | 4.7                                   |
| <i>POLE</i>           | 4.7                                   |
| <i>CTB-92J24.2</i>    | 4.7                                   |
| <i>CA8</i>            | 4.7                                   |
| <i>NCAPD3</i>         | 4.7                                   |
| <i>AC012363.8</i>     | 4.7                                   |
| <i>LL0XNC01-116E7</i> | 4.7                                   |
| <i>PAX6</i>           | 4.7                                   |
| <i>RP11-435J9.2</i>   | 4.7                                   |
| <i>TUBB4BP2</i>       | 4.7                                   |
| <i>AC002116.7</i>     | 4.7                                   |
| <i>RP11-530N7.2</i>   | 4.7                                   |
| <i>CTD-2574D22.2</i>  | 4.7                                   |
| <i>RP5-1025A1.3</i>   | 4.7                                   |
| <i>RBFADN</i>         | 4.7                                   |
| <i>UNG</i>            | 4.7                                   |
| <i>SUV420H2</i>       | 4.7                                   |
| <i>RP11-535M15.2</i>  | 4.7                                   |
| <i>AMOT</i>           | 4.7                                   |
| <i>SLC38A1</i>        | 4.7                                   |
| <i>RP11-281P23.2</i>  | 4.7                                   |
| <i>SASS6</i>          | 4.7                                   |
| <i>RP4-726N1.2</i>    | 4.7                                   |

| <b>Gene Name</b>       | <b>Fold change relative to normal</b> |
|------------------------|---------------------------------------|
| <i>RP11-889L3.4</i>    | 4.7                                   |
| <i>RP3-337H4.8</i>     | 4.7                                   |
| <i>PSMC3IP</i>         | 4.7                                   |
| <i>DUSP4</i>           | 4.7                                   |
| <i>RP11-264C15.2</i>   | 4.7                                   |
| <i>STRIP2</i>          | 4.6                                   |
| <i>GUSBP8</i>          | 4.6                                   |
| <i>RP11-1C8.5</i>      | 4.6                                   |
| <i>CTD-2547G23.4</i>   | 4.6                                   |
| <i>MCM7</i>            | 4.6                                   |
| <i>BSN-AS2</i>         | 4.6                                   |
| <i>RP11-77E14.2</i>    | 4.6                                   |
| <i>AC007461.2</i>      | 4.6                                   |
| <i>TNFRSF11A</i>       | 4.6                                   |
| <i>COL6A4P1</i>        | 4.6                                   |
| <i>RP11-196G18.22</i>  | 4.6                                   |
| <i>RP4-777D9.2</i>     | 4.6                                   |
| <i>HSD11B2</i>         | 4.6                                   |
| <i>TUBB2A</i>          | 4.6                                   |
| <i>IBSP</i>            | 4.6                                   |
| <i>FBXO45</i>          | 4.6                                   |
| <i>ERC2</i>            | 4.6                                   |
| <i>XXbac-B562F10.1</i> | 4.6                                   |
| <i>CBX1</i>            | 4.6                                   |
| <i>DBF4</i>            | 4.6                                   |
| <i>LRRN2</i>           | 4.6                                   |
| <i>NKPD1</i>           | 4.6                                   |
| <i>RBBP4P4</i>         | 4.6                                   |
| <i>AC011523.2</i>      | 4.6                                   |
| <i>TTC9B</i>           | 4.6                                   |
| <i>RP11-219B4.7</i>    | 4.6                                   |
| <i>SEC61A2</i>         | 4.6                                   |
| <i>HS3ST1</i>          | 4.6                                   |
| <i>AC074117.13</i>     | 4.6                                   |
| <i>TCP11X2</i>         | 4.6                                   |
| <i>MNS1</i>            | 4.6                                   |
| <i>ZMPSTE24</i>        | 4.6                                   |
| <i>Y_RNA</i>           | 4.6                                   |
| <i>GYLTL1B</i>         | 4.6                                   |
| <i>RPL7AP2</i>         | 4.5                                   |
| <i>CTB-102L5.8</i>     | 4.5                                   |
| <i>DPYSL3</i>          | 4.5                                   |
| <i>BRCA2</i>           | 4.5                                   |
| <i>POLR3G</i>          | 4.5                                   |
| <i>RP11-3B12.4</i>     | 4.5                                   |
| <i>CENPN</i>           | 4.5                                   |
| <i>AKR7L</i>           | 4.5                                   |
| <i>RP11-87C12.5</i>    | 4.5                                   |
| <i>SDK1</i>            | 4.5                                   |
| <i>RP11-412D9.4</i>    | 4.5                                   |
| <i>RP11-274H2.3</i>    | 4.5                                   |

| <b>Gene Name</b>      | <b>Fold change relative to normal</b> |
|-----------------------|---------------------------------------|
| <i>SSBP3-AS1</i>      | 4.5                                   |
| <i>C1orf74</i>        | 4.5                                   |
| <i>RP11-435O5.6</i>   | 4.5                                   |
| <i>RP11-560J1.2</i>   | 4.5                                   |
| <i>RP11-197P3.5</i>   | 4.5                                   |
| <i>RP11-100I7.1</i>   | 4.5                                   |
| <i>RP11-187A9.3</i>   | 4.5                                   |
| <i>GBAP1</i>          | 4.5                                   |
| <i>RP11-839D17.3</i>  | 4.5                                   |
| <i>BAALC</i>          | 4.5                                   |
| <i>ZC3HAV1L</i>       | 4.5                                   |
| <i>RP4-751H13.7</i>   | 4.5                                   |
| <i>DCLK2</i>          | 4.5                                   |
| <i>FRMPD1</i>         | 4.5                                   |
| <i>RP11-301O19.1</i>  | 4.5                                   |
| <i>CBX8</i>           | 4.5                                   |
| <i>CCDC87</i>         | 4.5                                   |
| <i>NME1</i>           | 4.5                                   |
| <i>H2AFX</i>          | 4.4                                   |
| <i>CIT</i>            | 4.4                                   |
| <i>ZNF8</i>           | 4.4                                   |
| <i>FSTL4</i>          | 4.4                                   |
| <i>AC114803.3</i>     | 4.4                                   |
| <i>RP11-334G22.1</i>  | 4.4                                   |
| <i>RP11-386G11.10</i> | 4.4                                   |
| <i>SATB2</i>          | 4.4                                   |
| <i>MSH2</i>           | 4.4                                   |
| <i>RN7SL381P</i>      | 4.4                                   |
| <i>CDC20P1</i>        | 4.4                                   |
| <i>RN7SL449P</i>      | 4.4                                   |
| <i>RP11-25B7.1</i>    | 4.4                                   |
| <i>RP11-181B11.1</i>  | 4.4                                   |
| <i>PCA3</i>           | 4.4                                   |
| <i>DBF4P1</i>         | 4.4                                   |
| <i>RP11-70L8.4</i>    | 4.4                                   |
| <i>MYADML2</i>        | 4.4                                   |
| <i>UPF3B</i>          | 4.4                                   |
| <i>RP5-943J3.2</i>    | 4.4                                   |
| <i>TMEM246</i>        | 4.4                                   |
| <i>CTPS1</i>          | 4.4                                   |
| <i>MXD3</i>           | 4.4                                   |
| <i>RP11-74C1.4</i>    | 4.4                                   |
| <i>TUBBP2</i>         | 4.4                                   |
| <i>AC083884.8</i>     | 4.4                                   |
| <i>C18orf54</i>       | 4.4                                   |
| <i>NCS1</i>           | 4.4                                   |
| <i>CTC-444N24.13</i>  | 4.4                                   |
| <i>SYTL4</i>          | 4.4                                   |
| <i>RP11-325L7.1</i>   | 4.4                                   |
| <i>RP11-506M12.1</i>  | 4.4                                   |
| <i>RP11-332J15.1</i>  | 4.4                                   |

| <b>Gene Name</b>     | <b>Fold change relative to normal</b> |
|----------------------|---------------------------------------|
| <i>IGFL1P1</i>       | 4.4                                   |
| <i>NARF-IT1</i>      | 4.4                                   |
| <i>ZGRF1</i>         | 4.4                                   |
| <i>RP11-2E11.9</i>   | 4.4                                   |
| <i>DIRC3-AS1</i>     | 4.4                                   |
| <i>RP3-467N11.1</i>  | 4.4                                   |
| <i>TRAPPC13P1</i>    | 4.4                                   |
| <i>FNDC7</i>         | 4.4                                   |
| <i>SLC16A1</i>       | 4.3                                   |
| <i>ANKRD20A1</i>     | 4.3                                   |
| <i>NAV1</i>          | 4.3                                   |
| <i>RP11-544A12.4</i> | 4.3                                   |
| <i>AC006262.11</i>   | 4.3                                   |
| <i>RP11-689C9.1</i>  | 4.3                                   |
| <i>RP11-386G11.5</i> | 4.3                                   |
| <i>SLC4A8</i>        | 4.3                                   |
| <i>PPM1H</i>         | 4.3                                   |
| <i>USP49</i>         | 4.3                                   |
| <i>POMC</i>          | 4.3                                   |
| <i>RP11-469L4.1</i>  | 4.3                                   |
| <i>KCTD21-AS1</i>    | 4.3                                   |
| <i>HNRNPA3P3</i>     | 4.3                                   |
| <i>RP11-272P10.2</i> | 4.3                                   |
| <i>RP11-401N16.2</i> | 4.3                                   |
| <i>IGLVIVOR22-1</i>  | 4.3                                   |
| <i>RP11-559M23.1</i> | 4.3                                   |
| <i>CDK2</i>          | 4.3                                   |
| <i>ANKRD32</i>       | 4.3                                   |
| <i>HTR6</i>          | 4.3                                   |
| <i>RGAG1</i>         | 4.3                                   |
| <i>FDPSP8</i>        | 4.3                                   |
| <i>RP11-305P22.9</i> | 4.3                                   |
| <i>RP11-435D7.3</i>  | 4.3                                   |
| <i>MZT1</i>          | 4.3                                   |
| <i>PHF6</i>          | 4.3                                   |
| <i>CTD-3138B18.6</i> | 4.3                                   |
| <i>OXCT1-AS1</i>     | 4.2                                   |
| <i>PGF</i>           | 4.2                                   |
| <i>RP11-18H7.1</i>   | 4.2                                   |
| <i>PLEKHG5</i>       | 4.2                                   |
| <i>RP11-312B8.1</i>  | 4.2                                   |
| <i>RP11-705O1.8</i>  | 4.2                                   |
| <i>RP5-1024G6.8</i>  | 4.2                                   |
| <i>STK24-AS1</i>     | 4.2                                   |
| <i>PRUNE2</i>        | 4.2                                   |
| <i>CHTF18</i>        | 4.2                                   |
| <i>ZNF681</i>        | 4.2                                   |
| <i>RP1-274L7.4</i>   | 4.2                                   |
| <i>CALR4P</i>        | 4.2                                   |
| <i>LINC01301</i>     | 4.2                                   |
| <i>SEZ6L2</i>        | 4.2                                   |



| <b>Gene Name</b>     | <b>Fold change relative to normal</b> |
|----------------------|---------------------------------------|
| <i>CYP4F8</i>        | 4.2                                   |
| <i>SLC2A1-AS1</i>    | 4.2                                   |
| <i>MCM3</i>          | 4.2                                   |
| <i>ATP6V1C2</i>      | 4.2                                   |
| <i>RP11-16N11.2</i>  | 4.2                                   |
| <i>ZNF93</i>         | 4.2                                   |
| <i>HOXB-AS2</i>      | 4.2                                   |
| <i>MCF2L-AS1</i>     | 4.2                                   |
| <i>DNAH14</i>        | 4.2                                   |
| <i>RP11-1012A1.7</i> | 4.2                                   |
| <i>RNU6-658P</i>     | 4.2                                   |
| <i>SNORD88A</i>      | 4.2                                   |
| <i>C16orf87</i>      | 4.2                                   |
| <i>RP11-376M2.2</i>  | 4.2                                   |
| <i>AC010642.1</i>    | 4.2                                   |
| <i>FAM155A</i>       | 4.2                                   |
| <i>SPDL1</i>         | 4.2                                   |
| <i>AC006042.6</i>    | 4.2                                   |
| <i>CDK2AP2P2</i>     | 4.2                                   |
| <i>TNFRSF25</i>      | 4.2                                   |
| <i>HMG2P3</i>        | 4.2                                   |
| <i>SLC2A1</i>        | 4.2                                   |
| <i>PTPRN2</i>        | 4.2                                   |
| <i>AC139099.5</i>    | 4.2                                   |
| <i>TSHZ2</i>         | 4.2                                   |
| <i>RP11-831A10.1</i> | 4.2                                   |
| <i>SLC26A5</i>       | 4.2                                   |
| <i>ZWILCH</i>        | 4.2                                   |
| <i>LMNB2</i>         | 4.2                                   |
| <i>RP11-466A19.3</i> | 4.2                                   |
| <i>RP11-466A19.8</i> | 4.2                                   |
| <i>KCNH1</i>         | 4.2                                   |
| <i>LGI2</i>          | 4.2                                   |
| <i>DHFRP1</i>        | 4.2                                   |
| <i>CENPH</i>         | 4.2                                   |
| <i>VN1R110P</i>      | 4.2                                   |
| <i>RP11-152N13.5</i> | 4.2                                   |
| <i>U47924.29</i>     | 4.2                                   |
| <i>PDK1</i>          | 4.1                                   |
| <i>PCDHB14</i>       | 4.1                                   |
| <i>IGFBP2</i>        | 4.1                                   |
| <i>AC135050.5</i>    | 4.1                                   |
| <i>KCND3</i>         | 4.1                                   |
| <i>TK1</i>           | 4.1                                   |
| <i>HAUS1P3</i>       | 4.1                                   |
| <i>DBF4B</i>         | 4.1                                   |
| <i>MCTS2P</i>        | 4.1                                   |
| <i>NT5DC3</i>        | 4.1                                   |
| <i>TUBG1</i>         | 4.1                                   |
| <i>PI15</i>          | 4.1                                   |
| <i>ZNF749</i>        | 4.1                                   |

| <b>Gene Name</b>     | <b>Fold change relative to normal</b> |
|----------------------|---------------------------------------|
| <i>RP13-455A7.1</i>  | 4.1                                   |
| <i>SMS</i>           | 4.1                                   |
| <i>ZNF726</i>        | 4.1                                   |
| <i>ZNF793</i>        | 4.1                                   |
| <i>RNU2-69P</i>      | 4.1                                   |
| <i>HAUS5</i>         | 4.1                                   |
| <i>PLXNB3</i>        | 4.1                                   |
| <i>PM20D2</i>        | 4.1                                   |
| <i>VPS37D</i>        | 4.1                                   |
| <i>LRP8</i>          | 4.1                                   |
| <i>ZNF519</i>        | 4.1                                   |
| <i>EGLN3</i>         | 4.1                                   |
| <i>HMG2</i>          | 4.1                                   |
| <i>PLCB1</i>         | 4.1                                   |
| <i>CACNB3</i>        | 4.1                                   |
| <i>RP11-21B23.1</i>  | 4.1                                   |
| <i>RCC2</i>          | 4.1                                   |
| <i>PDCD6IPP2</i>     | 4.1                                   |
| <i>RP11-335E6.3</i>  | 4.1                                   |
| <i>RP11-398C13.6</i> | 4.1                                   |
| <i>LA16c-358B7.4</i> | 4.1                                   |
| <i>RP11-385M4.3</i>  | 4.0                                   |
| <i>RP4-800J21.3</i>  | 4.0                                   |
| <i>FLJ41941</i>      | 4.0                                   |
| <i>AC093901.1</i>    | 4.0                                   |
| <i>PVRL1</i>         | 4.0                                   |
| <i>MDM1</i>          | 4.0                                   |
| <i>KIF22</i>         | 4.0                                   |
| <i>RP11-184M15.2</i> | 4.0                                   |
| <i>RP11-108M9.6</i>  | 4.0                                   |
| <i>RP11-746P2.3</i>  | 4.0                                   |
| <i>ZNF850</i>        | 4.0                                   |
| <i>RP11-52A20.2</i>  | 4.0                                   |
| <i>ZNF714</i>        | 4.0                                   |
| <i>CTA-390C10.9</i>  | 4.0                                   |
| <i>ICA1L</i>         | 4.0                                   |
| <i>HIST1H2BL</i>     | 4.0                                   |
| <i>USP1</i>          | 4.0                                   |
| <i>GOLGA2P8</i>      | 4.0                                   |
| <i>RP11-374M1.2</i>  | 4.0                                   |
| <i>RP11-1E4.1</i>    | 4.0                                   |
| <i>DNMT1</i>         | 4.0                                   |
| <i>NEURL1B</i>       | 4.0                                   |
| <i>HAUS1</i>         | 4.0                                   |
| <i>CROCCP1</i>       | 4.0                                   |
| <i>HYDIN2</i>        | 4.0                                   |
| <i>SLC7A1</i>        | 4.0                                   |
| <i>GKAP1</i>         | 4.0                                   |
| <i>RP11-516A11.1</i> | 4.0                                   |
| <i>NARF</i>          | 4.0                                   |
| <i>PSPH</i>          | 4.0                                   |

| <b>Gene Name</b>      | <b>Fold change relative to normal</b> |
|-----------------------|---------------------------------------|
| <i>RP13-735L24.1</i>  | 4.0                                   |
| <i>NFYC-AS1</i>       | 4.0                                   |
| <i>RP11-650J17.1</i>  | 4.0                                   |
| <i>RP4-665J23.2</i>   | 4.0                                   |
| <i>ICA1</i>           | 4.0                                   |
| <i>C14orf37</i>       | 4.0                                   |
| <i>MCOLN3</i>         | 4.0                                   |
| <i>CTD-2349P21.11</i> | 4.0                                   |
| <i>OR7E14P</i>        | 4.0                                   |
| <i>SETSIP</i>         | 4.0                                   |
| <i>ZNF525</i>         | 4.0                                   |
| <i>AC079753.5</i>     | 4.0                                   |
| <i>RP4-730K3.3</i>    | 4.0                                   |
| <i>SAAL1</i>          | 4.0                                   |
| <i>RP11-481A20.11</i> | 4.0                                   |
| <i>SRRM5</i>          | 4.0                                   |
| <i>RP11-110I1.12</i>  | 4.0                                   |
| <i>TTLL7</i>          | 4.0                                   |
| <i>CTD-2203K17.1</i>  | 4.0                                   |
| <i>FAM60A</i>         | 4.0                                   |
| <i>GMPS</i>           | 4.0                                   |
| <i>CTD-2555O16.3</i>  | 3.9                                   |
| <i>CAPN10-AS1</i>     | 3.9                                   |
| <i>TPI1P3</i>         | 3.9                                   |
| <i>RP11-376O6.2</i>   | 3.9                                   |
| <i>TPBGL</i>          | 3.9                                   |
| <i>MIR1289-1</i>      | 3.9                                   |
| <i>GINS3</i>          | 3.9                                   |
| <i>RP11-115C21.2</i>  | 3.9                                   |
| <i>SLC7A5</i>         | 3.9                                   |
| <i>LRRFIP1P1</i>      | 3.9                                   |
| <i>LARGE-AS1</i>      | 3.9                                   |
| <i>RP11-656D10.3</i>  | 3.9                                   |
| <i>SEPT5</i>          | 3.9                                   |
| <i>SLC4A3</i>         | 3.9                                   |
| <i>RP1-168L15.5</i>   | 3.9                                   |
| <i>HPRT1</i>          | 3.9                                   |
| <i>HSF2</i>           | 3.9                                   |
| <i>C2ORF15</i>        | 3.9                                   |
| <i>MAMSTR</i>         | 3.9                                   |
| <i>NUDT19P3</i>       | 3.9                                   |
| <i>NBEA</i>           | 3.9                                   |
| <i>HNRNPA3P10</i>     | 3.9                                   |
| <i>PGAP1</i>          | 3.9                                   |
| <i>GLT1D1</i>         | 3.9                                   |
| <i>RP11-573D15.8</i>  | 3.9                                   |
| <i>ITGB3BP</i>        | 3.9                                   |
| <i>AC068831.17</i>    | 3.9                                   |
| <i>RP11-2E11.10</i>   | 3.9                                   |
| <i>RP11-12G12.7</i>   | 3.9                                   |
| <i>ASB16</i>          | 3.9                                   |

| <b>Gene Name</b> | <b>Fold change relative to normal</b> |
|------------------|---------------------------------------|
| AC016831.6       | 3.9                                   |
| CENPO            | 3.9                                   |
| NCAPD2           | 3.9                                   |
| FNBP1P1          | 3.9                                   |
| SMAD9            | 3.9                                   |
| HSPA4L           | 3.9                                   |
| QSOX2            | 3.9                                   |
| ANK2             | 3.9                                   |
| RP11-613M5.1     | 3.8                                   |
| RP11-398K22.12   | 3.8                                   |
| MAFG-AS1         | 3.8                                   |
| PLOD2            | 3.8                                   |
| CHST1            | 3.8                                   |
| LINC00449        | 3.8                                   |
| SGSM1            | 3.8                                   |
| RP11-118E18.2    | 3.8                                   |
| POC1A            | 3.8                                   |
| ZNF233           | 3.8                                   |
| VN1R108P         | 3.8                                   |
| OR7E116P         | 3.8                                   |
| ZNF322           | 3.8                                   |
| EMC9             | 3.8                                   |
| CYP46A1          | 3.8                                   |
| RP11-22C11.2     | 3.8                                   |
| AK4P3            | 3.8                                   |
| RP11-602N24.3    | 3.8                                   |
| CCDC138          | 3.8                                   |
| PAICS            | 3.8                                   |
| AC012363.10      | 3.8                                   |
| HDAC2            | 3.8                                   |
| ZNF572           | 3.8                                   |
| DTYMK            | 3.8                                   |
| DLX2-AS1         | 3.8                                   |
| AC024937.4       | 3.8                                   |
| RAB3A            | 3.8                                   |
| CEP57L1          | 3.8                                   |
| UBAC2-AS1        | 3.8                                   |
| XXYLT1           | 3.8                                   |
| DHFR             | 3.8                                   |
| AP001046.5       | 3.8                                   |
| AL138935.1       | 3.8                                   |
| KRT8P39          | 3.8                                   |
| C3orf70          | 3.8                                   |
| CKAP5            | 3.8                                   |
| ZBED8            | 3.8                                   |
| RPL12P37         | 3.8                                   |
| SHCBP1           | 3.8                                   |
| ZNF385C          | 3.7                                   |
| HAUS6            | 3.7                                   |
| CTB-55O6.10      | 3.7                                   |
| ELOVL7           | 3.7                                   |

| <b>Gene Name</b>      | <b>Fold change relative to normal</b> |
|-----------------------|---------------------------------------|
| <i>SRGAP1</i>         | 3.7                                   |
| <i>TMTC4</i>          | 3.7                                   |
| <i>GAPDHP46</i>       | 3.7                                   |
| <i>CEP89</i>          | 3.7                                   |
| <i>CTD-2349P21.9</i>  | 3.7                                   |
| <i>RP11-262H14.5</i>  | 3.7                                   |
| <i>ZNF551</i>         | 3.7                                   |
| <i>PARP1</i>          | 3.7                                   |
| <i>RP4-761J14.9</i>   | 3.7                                   |
| <i>RP11-977G19.14</i> | 3.7                                   |
| <i>MTHFD2</i>         | 3.7                                   |
| <i>RGAG4</i>          | 3.7                                   |
| <i>RP11-644C3.1</i>   | 3.7                                   |
| <i>DHRS13</i>         | 3.7                                   |
| <i>IMMP1L</i>         | 3.7                                   |
| <i>TRIM37</i>         | 3.7                                   |
| <i>ZFP30</i>          | 3.7                                   |
| <i>RUVBL1</i>         | 3.7                                   |
| <i>ZDHHC15</i>        | 3.7                                   |
| <i>SRRM2-AS1</i>      | 3.7                                   |
| <i>ULBP1</i>          | 3.7                                   |
| <i>RP11-348M3.2</i>   | 3.7                                   |
| <i>XPOTP1</i>         | 3.7                                   |
| <i>IPO5P1</i>         | 3.7                                   |
| <i>G2E3</i>           | 3.7                                   |
| <i>AP001619.3</i>     | 3.7                                   |
| <i>BORA</i>           | 3.7                                   |
| <i>RP11-134K13.2</i>  | 3.7                                   |
| <i>NFASC</i>          | 3.7                                   |
| <i>KIAA1024</i>       | 3.7                                   |
| <i>KDM1A</i>          | 3.7                                   |
| <i>SPATS2</i>         | 3.7                                   |
| <i>COQ3</i>           | 3.7                                   |
| <i>JAKMIP1</i>        | 3.7                                   |
| <i>LYSMD1</i>         | 3.7                                   |
| <i>RP11-552F3.12</i>  | 3.7                                   |
| <i>ARHGAP39</i>       | 3.6                                   |
| <i>LEF1-AS1</i>       | 3.6                                   |
| <i>ZSCAN23</i>        | 3.6                                   |
| <i>LPGAT1</i>         | 3.6                                   |
| <i>ASRGL1</i>         | 3.6                                   |
| <i>JADE3</i>          | 3.6                                   |
| <i>POLA2</i>          | 3.6                                   |
| <i>CEP19</i>          | 3.6                                   |
| <i>HIST1H2BD</i>      | 3.6                                   |
| <i>RP11-632L2.2</i>   | 3.6                                   |
| <i>THOC7-AS1</i>      | 3.6                                   |
| <i>OCIAD2</i>         | 3.6                                   |
| <i>CTD-2619J13.16</i> | 3.6                                   |
| <i>FANCC</i>          | 3.6                                   |
| <i>NCR3LG1</i>        | 3.6                                   |

| <b>Gene Name</b>      | <b>Fold change relative to normal</b> |
|-----------------------|---------------------------------------|
| <i>PIPOX</i>          | 3.6                                   |
| <i>CCDC14</i>         | 3.6                                   |
| <i>FLVCR1</i>         | 3.6                                   |
| <i>GATS</i>           | 3.6                                   |
| <i>MTFR2</i>          | 3.6                                   |
| <i>PRKAA2</i>         | 3.6                                   |
| <i>DDX39A</i>         | 3.6                                   |
| <i>CTC-559E9.8</i>    | 3.6                                   |
| <i>FA2H</i>           | 3.6                                   |
| <i>TUSC3</i>          | 3.6                                   |
| <i>RP11-409K20.7</i>  | 3.6                                   |
| <i>DDIAS</i>          | 3.6                                   |
| <i>RBM38</i>          | 3.6                                   |
| <i>MAST2</i>          | 3.6                                   |
| <i>SOGA1</i>          | 3.6                                   |
| <i>RP4-739H11.3</i>   | 3.6                                   |
| <i>RNU6-97P</i>       | 3.6                                   |
| <i>RP11-375N15.2</i>  | 3.6                                   |
| <i>PHF8</i>           | 3.6                                   |
| <i>CREB3L4</i>        | 3.6                                   |
| <i>JAM3</i>           | 3.6                                   |
| <i>RP11-71H17.9</i>   | 3.6                                   |
| <i>LINC01240</i>      | 3.6                                   |
| <i>TSPY26P</i>        | 3.6                                   |
| <i>LRR1</i>           | 3.6                                   |
| <i>APOO</i>           | 3.6                                   |
| <i>EFS</i>            | 3.6                                   |
| <i>MSH6</i>           | 3.6                                   |
| <i>PLEKHA6</i>        | 3.6                                   |
| <i>EPB41</i>          | 3.6                                   |
| <i>CHD7</i>           | 3.6                                   |
| <i>WDR34</i>          | 3.6                                   |
| <i>RAP1GAP2</i>       | 3.6                                   |
| <i>ZEB1-AS1</i>       | 3.6                                   |
| <i>SETBP1</i>         | 3.6                                   |
| <i>RP1-167A14.2</i>   | 3.6                                   |
| <i>PTOV1-AS1</i>      | 3.6                                   |
| <i>ABCA5</i>          | 3.6                                   |
| <i>PRDX2</i>          | 3.6                                   |
| <i>KANTR</i>          | 3.5                                   |
| <i>RP11-1023L17.1</i> | 3.5                                   |
| <i>ZNF43</i>          | 3.5                                   |
| <i>ATP13A3</i>        | 3.5                                   |
| <i>ERO1LB</i>         | 3.5                                   |
| <i>USP37</i>          | 3.5                                   |
| <i>TONSL</i>          | 3.5                                   |
| <i>BOLA3-AS1</i>      | 3.5                                   |
| <i>CNTLN</i>          | 3.5                                   |
| <i>CBX5</i>           | 3.5                                   |
| <i>PHF19</i>          | 3.5                                   |
| <i>SDR42E1</i>        | 3.5                                   |

| <b>Gene Name</b>     | <b>Fold change relative to normal</b> |
|----------------------|---------------------------------------|
| <i>BTBD3</i>         | 3.5                                   |
| <i>HMGB1P14</i>      | 3.5                                   |
| <i>PDRG1</i>         | 3.5                                   |
| <i>HDGFL1</i>        | 3.5                                   |
| <i>TDP1</i>          | 3.5                                   |
| <i>RP11-3B12.2</i>   | 3.5                                   |
| <i>RP11-706O15.1</i> | 3.5                                   |
| <i>SLC1A4</i>        | 3.5                                   |
| <i>TOX</i>           | 3.5                                   |
| <i>BLM</i>           | 3.5                                   |
| <i>RP11-815I9.4</i>  | 3.5                                   |
| <i>RP11-580I16.2</i> | 3.5                                   |
| <i>UBA2</i>          | 3.5                                   |
| <i>HOOK1</i>         | 3.5                                   |
| <i>PCDHB16</i>       | 3.5                                   |
| <i>VRK1</i>          | 3.5                                   |
| <i>RP11-761I4.5</i>  | 3.5                                   |
| <i>DBNDD1</i>        | 3.5                                   |
| <i>NANOS1</i>        | 3.5                                   |
| <i>NNT-AS1</i>       | 3.5                                   |
| <i>RP11-49C9.2</i>   | 3.5                                   |
| <i>SMC1A</i>         | 3.5                                   |
| <i>INTS7</i>         | 3.5                                   |
| <i>FAM122B</i>       | 3.5                                   |
| <i>GAS2L3</i>        | 3.5                                   |
| <i>PRMT6</i>         | 3.5                                   |
| <i>ETNK2</i>         | 3.5                                   |
| <i>PTGER4P2</i>      | 3.5                                   |
| <i>MAPK12</i>        | 3.4                                   |
| <i>MCF2L2</i>        | 3.4                                   |
| <i>CTD-2528A14.3</i> | 3.4                                   |
| <i>CKS2</i>          | 3.4                                   |
| <i>NDC1</i>          | 3.4                                   |
| <i>RP4-736L20.3</i>  | 3.4                                   |
| <i>NAPB</i>          | 3.4                                   |
| <i>TDGP1</i>         | 3.4                                   |
| <i>DKC1</i>          | 3.4                                   |
| <i>SHF</i>           | 3.4                                   |
| <i>OVOL2</i>         | 3.4                                   |
| <i>BHLHB9</i>        | 3.4                                   |
| <i>RP11-278A23.4</i> | 3.4                                   |
| <i>SKAP1</i>         | 3.4                                   |
| <i>CAMK1D</i>        | 3.4                                   |
| <i>ZDHHC23</i>       | 3.4                                   |
| <i>RP5-935K16.1</i>  | 3.4                                   |
| <i>PAIP2B</i>        | 3.4                                   |
| <i>NUP210</i>        | 3.4                                   |
| <i>ZNF92</i>         | 3.4                                   |
| <i>PTTG3P</i>        | 3.4                                   |
| <i>DCLK1</i>         | 3.4                                   |
| <i>PGM2L1</i>        | 3.4                                   |

| <b>Gene Name</b>      | <b>Fold change relative to normal</b> |
|-----------------------|---------------------------------------|
| <i>DEK</i>            | 3.4                                   |
| <i>SHMT2</i>          | 3.4                                   |
| <i>ACVR1C</i>         | 3.4                                   |
| <i>SLC25A15</i>       | 3.4                                   |
| <i>TUBAP2</i>         | 3.4                                   |
| <i>LINC01002</i>      | 3.4                                   |
| <i>CEP131</i>         | 3.4                                   |
| <i>ALYREF</i>         | 3.4                                   |
| <i>PRIM2</i>          | 3.4                                   |
| <i>ROBO1</i>          | 3.4                                   |
| <i>RNU4-39P</i>       | 3.4                                   |
| <i>SLC22A17</i>       | 3.4                                   |
| <i>GJC1</i>           | 3.4                                   |
| <i>MAP1A</i>          | 3.4                                   |
| <i>GUSBP2</i>         | 3.4                                   |
| <i>BEND3</i>          | 3.4                                   |
| <i>AC012512.1</i>     | 3.4                                   |
| <i>TMEM201</i>        | 3.4                                   |
| <i>PPP1R14B</i>       | 3.4                                   |
| <i>PAICSP3</i>        | 3.4                                   |
| <i>FAM24B</i>         | 3.4                                   |
| <i>CDKN2D</i>         | 3.4                                   |
| <i>ARL6IP6</i>        | 3.4                                   |
| <i>CENPQ</i>          | 3.4                                   |
| <i>MYL6B</i>          | 3.3                                   |
| <i>HAUS8</i>          | 3.3                                   |
| <i>CTC-137K3.1</i>    | 3.3                                   |
| <i>RP11-433O3.1</i>   | 3.3                                   |
| <i>AP001469.9</i>     | 3.3                                   |
| <i>MIS18A</i>         | 3.3                                   |
| <i>LDLRAD3</i>        | 3.3                                   |
| <i>KIT</i>            | 3.3                                   |
| <i>PPFIA3</i>         | 3.3                                   |
| <i>UQCC2</i>          | 3.3                                   |
| <i>RPL7P17</i>        | 3.3                                   |
| <i>RP11-22B23.1</i>   | 3.3                                   |
| <i>HMGA1P2</i>        | 3.3                                   |
| <i>QSER1</i>          | 3.3                                   |
| <i>RP11-65D24.2</i>   | 3.3                                   |
| <i>HCN3</i>           | 3.3                                   |
| <i>CMSS1</i>          | 3.3                                   |
| <i>RP11-395L14.17</i> | 3.3                                   |
| <i>CEP72</i>          | 3.3                                   |
| <i>ZC3H8</i>          | 3.3                                   |
| <i>BTNL10</i>         | 3.3                                   |
| <i>CTC-244M17.1</i>   | 3.3                                   |
| <i>CDK4</i>           | 3.3                                   |
| <i>RP11-138P22.1</i>  | 3.3                                   |
| <i>KCTD1</i>          | 3.3                                   |
| <i>IFT81</i>          | 3.3                                   |
| <i>MCF2L</i>          | 3.3                                   |



| <b>Gene Name</b> | <b>Fold change relative to normal</b> |
|------------------|---------------------------------------|
| ZNF587           | 3.3                                   |
| TOB2P1           | 3.3                                   |
| TMOD2            | 3.3                                   |
| MAP2K6           | 3.3                                   |
| HIST2H2BE        | 3.3                                   |
| ZNF543           | 3.3                                   |
| RBBP4P1          | 3.3                                   |
| PLCB4            | 3.3                                   |
| GATSL2           | 3.3                                   |
| PPP1R14BP3       | 3.3                                   |
| TBCCD1           | 3.3                                   |
| FBXO16           | 3.3                                   |
| GLB1L2           | 3.3                                   |
| MIR1302-3        | 3.3                                   |
| NFIB             | 3.3                                   |
| RCC1             | 3.3                                   |
| RAB3IP           | 3.3                                   |
| UBXN7            | 3.3                                   |
| BCL2             | 3.3                                   |
| NABP2            | 3.3                                   |
| HLTF             | 3.3                                   |
| TSPYL5           | 3.2                                   |
| ZNF138           | 3.2                                   |
| NONO             | 3.2                                   |
| FADS2            | 3.2                                   |
| RBBP7            | 3.2                                   |
| C12orf73         | 3.2                                   |
| MTND3P10         | 3.2                                   |
| ZNF473           | 3.2                                   |
| PNMA1            | 3.2                                   |
| RP11-798M19.6    | 3.2                                   |
| ZNF286A          | 3.2                                   |
| WDR90            | 3.2                                   |
| NASP             | 3.2                                   |
| KNSTRN           | 3.2                                   |
| RHPN2            | 3.2                                   |
| PIGX             | 3.2                                   |
| H2AFY2           | 3.2                                   |
| URB2             | 3.2                                   |
| RP4-680D5.8      | 3.2                                   |
| TMEM44           | 3.2                                   |
| PMEL             | 3.2                                   |
| RN7SL396P        | 3.2                                   |
| SUZ12P1          | 3.2                                   |
| ZNF280C          | 3.2                                   |
| H2AFZ            | 3.2                                   |
| LINC00526        | 3.2                                   |
| RFWD3            | 3.2                                   |
| BOC              | 3.2                                   |
| CCP110           | 3.2                                   |
| SMIM17           | 3.2                                   |

| <b>Gene Name</b>     | <b>Fold change relative to normal</b> |
|----------------------|---------------------------------------|
| <i>RN7SL569P</i>     | 3.2                                   |
| <i>DSN1</i>          | 3.2                                   |
| <i>FBXO32</i>        | 3.2                                   |
| <i>CCDC15</i>        | 3.2                                   |
| <i>RBBP8</i>         | 3.2                                   |
| <i>VAV2</i>          | 3.2                                   |
| <i>KIAA0907</i>      | 3.2                                   |
| <i>TMEM108</i>       | 3.2                                   |
| <i>SH3BP4</i>        | 3.2                                   |
| <i>YEATS4</i>        | 3.2                                   |
| <i>LSM7</i>          | 3.2                                   |
| <i>EID2B</i>         | 3.2                                   |
| <i>TMEM150C</i>      | 3.2                                   |
| <i>PAXBP1-AS1</i>    | 3.2                                   |
| <i>SLC16A8</i>       | 3.2                                   |
| <i>CTD-2368P22.1</i> | 3.2                                   |
| <i>RP11-440L14.1</i> | 3.2                                   |
| <i>PARD6G</i>        | 3.2                                   |
| <i>IDH2</i>          | 3.1                                   |
| <i>KDEL1C</i>        | 3.1                                   |
| <i>KLF12</i>         | 3.1                                   |
| <i>NCBP1</i>         | 3.1                                   |
| <i>DBN1</i>          | 3.1                                   |
| <i>GF11</i>          | 3.1                                   |
| <i>ZNF620</i>        | 3.1                                   |
| <i>SSBP3</i>         | 3.1                                   |
| <i>PFKP</i>          | 3.1                                   |
| <i>CCDC167</i>       | 3.1                                   |
| <i>EFR3B</i>         | 3.1                                   |
| <i>RSRC1</i>         | 3.1                                   |
| <i>RNF219</i>        | 3.1                                   |
| <i>RP11-598P20.3</i> | 3.1                                   |
| <i>PRPS2</i>         | 3.1                                   |
| <i>ZNF680</i>        | 3.1                                   |
| <i>KCNC4</i>         | 3.1                                   |
| <i>KCNJ11</i>        | 3.1                                   |
| <i>ZNF669</i>        | 3.1                                   |
| <i>MRPS31P4</i>      | 3.1                                   |
| <i>TDG</i>           | 3.1                                   |
| <i>ILF2</i>          | 3.1                                   |
| <i>ZNF606</i>        | 3.1                                   |
| <i>POLR2H</i>        | 3.1                                   |
| <i>GLS2</i>          | 3.1                                   |
| <i>OLFM1</i>         | 3.1                                   |
| <i>FKBP4</i>         | 3.1                                   |
| <i>BSPRY</i>         | 3.1                                   |
| <i>C19orf40</i>      | 3.1                                   |
| <i>SPPL2B</i>        | 3.1                                   |
| <i>KIAA1586</i>      | 3.1                                   |
| <i>DNAJC3-AS1</i>    | 3.1                                   |
| <i>ZNF253</i>        | 3.1                                   |

| <b>Gene Name</b> | <b>Fold change relative to normal</b> |
|------------------|---------------------------------------|
| ZNF544           | 3.1                                   |
| CA14             | 3.1                                   |
| RP11-728K20.3    | 3.1                                   |
| GNN              | 3.1                                   |
| RBBP4            | 3.1                                   |
| SPICE1           | 3.1                                   |
| RP11-292F9.1     | 3.1                                   |
| ZNF550           | 3.1                                   |
| DNAJC9           | 3.1                                   |
| ZNF708           | 3.1                                   |
| TIPIN            | 3.1                                   |
| GPX7             | 3.1                                   |
| CTD-3193O13.8    | 3.0                                   |
| RHPN1            | 3.0                                   |
| NARS2            | 3.0                                   |
| CTD-2293H3.2     | 3.0                                   |
| CTC-359D24.3     | 3.0                                   |
| OPA1             | 3.0                                   |
| PGK1P2           | 3.0                                   |
| SS18L1           | 3.0                                   |
| GPR180           | 3.0                                   |
| CABLES2          | 3.0                                   |
| CTD-2561J22.2    | 3.0                                   |
| RP3-508I15.9     | 3.0                                   |
| RPGRIP1L         | 3.0                                   |
| FANCL            | 3.0                                   |
| RP4-585I14.3     | 3.0                                   |
| CTD-2583A14.8    | 3.0                                   |
| WDR53            | 3.0                                   |
| GS1-257G1.1      | 3.0                                   |
| SEMA6C           | 3.0                                   |
| AP3M2            | 3.0                                   |
| WHSC1            | 3.0                                   |
| RP11-160O5.1     | 3.0                                   |
| TFAP4            | 3.0                                   |
| FKBP3            | 3.0                                   |
| TMEM97           | 3.0                                   |
| ZRANB3           | 3.0                                   |
| KPTN             | 3.0                                   |
| INSR             | 3.0                                   |
| FADS1            | 3.0                                   |
| AC004987.9       | 3.0                                   |
| RFC2             | 3.0                                   |
| EPT1             | 3.0                                   |
| TACC3            | 3.0                                   |
| TMEM14A          | 3.0                                   |
| TPD52            | 3.0                                   |
| ZNF221           | 3.0                                   |
| SENP1            | 3.0                                   |
| C11orf84         | 3.0                                   |
| PRKDC            | 3.0                                   |

| <b>Gene Name</b>      | <b>Fold change relative to normal</b> |
|-----------------------|---------------------------------------|
| <i>MAGEF1</i>         | 3.0                                   |
| <i>SRPK1</i>          | 3.0                                   |
| <i>PCNXL2</i>         | 3.0                                   |
| <i>MARCH6</i>         | 3.0                                   |
| <i>SLC39A6</i>        | 3.0                                   |
| <i>SNRPD1</i>         | 3.0                                   |
| <i>DARS2</i>          | 3.0                                   |
| <i>MARCKS</i>         | 3.0                                   |
| <i>SORD</i>           | 3.0                                   |
| <i>FOXRED2</i>        | 3.0                                   |
| <i>METTL4</i>         | 3.0                                   |
| <i>BRX1</i>           | 3.0                                   |
| <i>PARP2</i>          | 3.0                                   |
| <i>CNKSR2</i>         | 3.0                                   |
| <i>ARHGEF19</i>       | 3.0                                   |
| <i>ENAH</i>           | 3.0                                   |
| <i>LIN9</i>           | 3.0                                   |
| <i>CEP76</i>          | 3.0                                   |
| <i>ZFP37</i>          | 3.0                                   |
| <i>SNRPB</i>          | 3.0                                   |
| <i>XRCC3</i>          | 2.9                                   |
| <i>ALMS1</i>          | 2.9                                   |
| <i>NREP</i>           | 2.9                                   |
| <i>HN1L</i>           | 2.9                                   |
| <i>C17orf75</i>       | 2.9                                   |
| <i>GLMN</i>           | 2.9                                   |
| <i>ANP32E</i>         | 2.9                                   |
| <i>TMEM38B</i>        | 2.9                                   |
| <i>ZNF334</i>         | 2.9                                   |
| <i>NAA40</i>          | 2.9                                   |
| <i>SAE1</i>           | 2.9                                   |
| <i>TBPL1</i>          | 2.9                                   |
| <i>ZNF594</i>         | 2.9                                   |
| <i>VBP1</i>           | 2.9                                   |
| <i>PTBP2</i>          | 2.9                                   |
| <i>FANCF</i>          | 2.9                                   |
| <i>CTD-3138B18.5</i>  | 2.9                                   |
| <i>RP11-15H20.6</i>   | 2.9                                   |
| <i>ING1</i>           | 2.9                                   |
| <i>NRSN2</i>          | 2.9                                   |
| <i>ZNF137P</i>        | 2.9                                   |
| <i>KIF21A</i>         | 2.9                                   |
| <i>RP11-1033A18.1</i> | 2.9                                   |
| <i>APOA1BP</i>        | 2.9                                   |
| <i>ATL1</i>           | 2.9                                   |
| <i>LBR</i>            | 2.9                                   |
| <i>C10orf35</i>       | 2.9                                   |
| <i>BNIP3</i>          | 2.9                                   |
| <i>TAF9B</i>          | 2.9                                   |
| <i>CCDC18</i>         | 2.9                                   |
| <i>CACYBP</i>         | 2.9                                   |

| <b>Gene Name</b> | <b>Fold change relative to normal</b> |
|------------------|---------------------------------------|
| SOX12            | 2.9                                   |
| ZNF347           | 2.9                                   |
| AC024560.3       | 2.9                                   |
| RP11-2711.4      | 2.9                                   |
| NR2C2AP          | 2.9                                   |
| TUBBP1           | 2.9                                   |
| ZNF260           | 2.9                                   |
| TTF2             | 2.9                                   |
| TFDP2            | 2.9                                   |
| POT1-AS1         | 2.9                                   |
| PROSER3          | 2.9                                   |
| TUBA1B           | 2.9                                   |
| EFCAB7           | 2.8                                   |
| IQCB1            | 2.8                                   |
| ZNF227           | 2.8                                   |
| IPO9             | 2.8                                   |
| RNF168           | 2.8                                   |
| SNAPC3           | 2.8                                   |
| RAE1             | 2.8                                   |
| RPRD1A           | 2.8                                   |
| R3HDM1           | 2.8                                   |
| C1orf109         | 2.8                                   |
| TMEM237          | 2.8                                   |
| MAP3K14-AS1      | 2.8                                   |
| RHNO1            | 2.8                                   |
| GEMIN2           | 2.8                                   |
| LIG3             | 2.8                                   |
| GDI1             | 2.8                                   |
| ZNF491           | 2.8                                   |
| EXOSC2           | 2.8                                   |
| RAD51C           | 2.8                                   |
| PLEKHH1          | 2.8                                   |
| NAT14            | 2.8                                   |
| GPR161           | 2.8                                   |
| TBC1D30          | 2.8                                   |
| SFXN1            | 2.8                                   |
| ZNF81            | 2.8                                   |
| RUSC1            | 2.8                                   |
| ACVR2A           | 2.8                                   |
| CASP8AP2         | 2.8                                   |
| EXOSC5           | 2.8                                   |
| LIN52            | 2.8                                   |
| MTHFD1           | 2.8                                   |
| NOP56            | 2.8                                   |
| TMEM206          | 2.8                                   |
| LMBRD2           | 2.8                                   |
| PRPS1            | 2.8                                   |
| AACS             | 2.8                                   |
| RTTN             | 2.8                                   |
| LSG1             | 2.8                                   |
| PIAS2            | 2.8                                   |

| <b>Gene Name</b> | <b>Fold change relative to normal</b> |
|------------------|---------------------------------------|
| <i>SENP5</i>     | 2.8                                   |
| <i>TTC5</i>      | 2.8                                   |
| <i>STK39</i>     | 2.8                                   |
| <i>CSTF3</i>     | 2.8                                   |
| <i>PGBD1</i>     | 2.8                                   |
| <i>FBXO41</i>    | 2.8                                   |
| <i>TPI1P1</i>    | 2.8                                   |
| <i>E2F3</i>      | 2.8                                   |
| <i>CCDC23</i>    | 2.8                                   |
| <i>ARHGEF7</i>   | 2.8                                   |
| <i>CENPP</i>     | 2.8                                   |
| <i>RIC8B</i>     | 2.8                                   |
| <i>CCT5</i>      | 2.8                                   |
| <i>TSPYL4</i>    | 2.8                                   |
| <i>GNL3L</i>     | 2.8                                   |
| <i>RCCD1</i>     | 2.8                                   |
| <i>CEP152</i>    | 2.8                                   |
| <i>ERH</i>       | 2.7                                   |
| <i>SMYD3</i>     | 2.7                                   |
| <i>CENPJ</i>     | 2.7                                   |
| <i>NNT</i>       | 2.7                                   |
| <i>ATG4D</i>     | 2.7                                   |
| <i>LFNG</i>      | 2.7                                   |
| <i>PXYLP1</i>    | 2.7                                   |
| <i>DCTN3</i>     | 2.7                                   |
| <i>ANAPC11</i>   | 2.7                                   |
| <i>TBC1D31</i>   | 2.7                                   |
| <i>CBX3P9</i>    | 2.7                                   |
| <i>PPP5C</i>     | 2.7                                   |
| <i>PIGCP1</i>    | 2.7                                   |
| <i>KIAA1731</i>  | 2.7                                   |
| <i>NUP205</i>    | 2.7                                   |
| <i>DROSHA</i>    | 2.7                                   |
| <i>RBL1</i>      | 2.7                                   |
| <i>SAC3D1</i>    | 2.7                                   |
| <i>WRAP73</i>    | 2.7                                   |
| <i>THOP1</i>     | 2.7                                   |
| <i>POU2F1</i>    | 2.7                                   |
| <i>STRA13</i>    | 2.7                                   |
| <i>ZNF121</i>    | 2.7                                   |
| <i>BRWD3</i>     | 2.7                                   |
| <i>GAPDH</i>     | 2.7                                   |
| <i>CYB5RL</i>    | 2.7                                   |
| <i>ZNF772</i>    | 2.7                                   |
| <i>SLC25A14</i>  | 2.7                                   |
| <i>SUV39H1</i>   | 2.7                                   |
| <i>HN1</i>       | 2.7                                   |
| <i>GAS5-AS1</i>  | 2.7                                   |
| <i>PHF13</i>     | 2.7                                   |
| <i>L2HGDH</i>    | 2.7                                   |
| <i>KIF2A</i>     | 2.7                                   |

| <b>Gene Name</b> | <b>Fold change relative to normal</b> |
|------------------|---------------------------------------|
| <i>DCTPP1</i>    | 2.7                                   |
| <i>ASB16-AS1</i> | 2.7                                   |
| <i>DCAKD</i>     | 2.7                                   |
| <i>RNF138</i>    | 2.7                                   |
| <i>YEATS2</i>    | 2.7                                   |
| <i>NDUFA7</i>    | 2.7                                   |
| <i>SP4</i>       | 2.7                                   |
| <i>STRBP</i>     | 2.7                                   |
| <i>GTF3C5</i>    | 2.7                                   |
| <i>AGAP1</i>     | 2.7                                   |
| <i>POLD1</i>     | 2.7                                   |
| <i>NUCKS1</i>    | 2.7                                   |
| <i>CHML</i>      | 2.7                                   |
| <i>TSEN54</i>    | 2.7                                   |
| <i>SRP9</i>      | 2.7                                   |
| <i>XPR1</i>      | 2.7                                   |
| <i>ZBTB18</i>    | 2.7                                   |
| <i>ZNF107</i>    | 2.7                                   |
| <i>ANGPT2</i>    | 2.6                                   |
| <i>PAPD7</i>     | 2.6                                   |
| <i>ZNF480</i>    | 2.6                                   |
| <i>MASTL</i>     | 2.6                                   |
| <i>CCDC77</i>    | 2.6                                   |
| <i>SNRNP25</i>   | 2.6                                   |
| <i>ANKEF1</i>    | 2.6                                   |
| <i>HTATSF1</i>   | 2.6                                   |
| <i>TIMM50</i>    | 2.6                                   |
| <i>XPO5</i>      | 2.6                                   |
| <i>ZNF232</i>    | 2.6                                   |
| <i>SUZ12</i>     | 2.6                                   |
| <i>ZBTB39</i>    | 2.6                                   |
| <i>PHKA1</i>     | 2.6                                   |
| <i>YPEL1</i>     | 2.6                                   |
| <i>FYTTD1</i>    | 2.6                                   |
| <i>NUP85</i>     | 2.6                                   |
| <i>NUP62</i>     | 2.6                                   |
| <i>VANGL1</i>    | 2.6                                   |
| <i>PKIA</i>      | 2.6                                   |
| <i>DTX3</i>      | 2.6                                   |
| <i>ZNF3</i>      | 2.6                                   |
| <i>C11orf80</i>  | 2.6                                   |
| <i>SLC25A13</i>  | 2.6                                   |
| <i>SAMD1</i>     | 2.6                                   |
| <i>GRAMD1B</i>   | 2.6                                   |
| <i>HSP90AA1</i>  | 2.6                                   |
| <i>PJA1</i>      | 2.6                                   |
| <i>SNRPE</i>     | 2.6                                   |
| <i>C17orf80</i>  | 2.6                                   |
| <i>EIF4A3</i>    | 2.6                                   |
| <i>TRERF1</i>    | 2.6                                   |
| <i>POLE3</i>     | 2.6                                   |

| <b>Gene Name</b>   | <b>Fold change relative to normal</b> |
|--------------------|---------------------------------------|
| <i>NT5DC2</i>      | 2.6                                   |
| <i>TDRKH</i>       | 2.6                                   |
| <i>LPHN1</i>       | 2.6                                   |
| <i>TMEM176A</i>    | 2.6                                   |
| <i>ATP5G1</i>      | 2.6                                   |
| <i>MED14</i>       | 2.6                                   |
| <i>PRPF4</i>       | 2.6                                   |
| <i>TMEM260</i>     | 2.6                                   |
| <i>INTS2</i>       | 2.6                                   |
| <i>ZNF254</i>      | 2.6                                   |
| <i>FAF1</i>        | 2.6                                   |
| <i>NOL11</i>       | 2.6                                   |
| <i>PIAS3</i>       | 2.6                                   |
| <i>JAG2</i>        | 2.6                                   |
| <i>RP1-283E3.8</i> | 2.6                                   |
| <i>MED27</i>       | 2.6                                   |
| <i>GADD45G</i>     | 2.6                                   |
| <i>ODF2</i>        | 2.6                                   |
| <i>GPC6</i>        | 2.6                                   |
| <i>AC019097.7</i>  | 2.6                                   |
| <i>ARL6IP1</i>     | 2.6                                   |
| <i>KIFC2</i>       | 2.6                                   |
| <i>KPNB1</i>       | 2.6                                   |
| <i>DHX36</i>       | 2.6                                   |
| <i>CHEK2</i>       | 2.6                                   |
| <i>TUFT1</i>       | 2.6                                   |
| <i>ZNF611</i>      | 2.6                                   |
| <i>EXTL3</i>       | 2.6                                   |
| <i>KIF20B</i>      | 2.6                                   |
| <i>CSE1L</i>       | 2.6                                   |
| <i>PSD3</i>        | 2.6                                   |
| <i>PER3</i>        | 2.6                                   |
| <i>GGCT</i>        | 2.5                                   |
| <i>SETP14</i>      | 2.5                                   |
| <i>SOCS4</i>       | 2.5                                   |
| <i>B4GALT2</i>     | 2.5                                   |
| <i>SLX4IP</i>      | 2.5                                   |
| <i>CDCA7L</i>      | 2.5                                   |
| <i>U2SURP</i>      | 2.5                                   |
| <i>EPCAM</i>       | 2.5                                   |
| <i>ZMYM3</i>       | 2.5                                   |
| <i>PGAM5</i>       | 2.5                                   |
| <i>TMEM38A</i>     | 2.5                                   |
| <i>C11orf30</i>    | 2.5                                   |
| <i>LINC00680</i>   | 2.5                                   |
| <i>C2CD3</i>       | 2.5                                   |
| <i>ATP7B</i>       | 2.5                                   |
| <i>SUPT16H</i>     | 2.5                                   |
| <i>CAND1</i>       | 2.5                                   |
| <i>ZNF417</i>      | 2.5                                   |
| <i>KDM1B</i>       | 2.5                                   |



| <b>Gene Name</b>    | <b>Fold change relative to normal</b> |
|---------------------|---------------------------------------|
| <i>DYRK2</i>        | 2.5                                   |
| <i>DCUN1D2</i>      | 2.5                                   |
| <i>CCT3</i>         | 2.5                                   |
| <i>NUP107</i>       | 2.5                                   |
| <i>VPS72</i>        | 2.5                                   |
| <i>RTN3P1</i>       | 2.5                                   |
| <i>LRRC8B</i>       | 2.5                                   |
| <i>FUZ</i>          | 2.5                                   |
| <i>BCOR</i>         | 2.5                                   |
| <i>HDGFRP3</i>      | 2.5                                   |
| <i>DLG3</i>         | 2.5                                   |
| <i>USP11</i>        | 2.5                                   |
| <i>RP11-156P1.3</i> | 2.5                                   |
| <i>PHTF1</i>        | 2.5                                   |
| <i>BRD3</i>         | 2.5                                   |
| <i>CSTF2</i>        | 2.5                                   |
| <i>ZNF428</i>       | 2.5                                   |
| <i>C12orf65</i>     | 2.5                                   |
| <i>ZNF776</i>       | 2.5                                   |
| <i>TBC1D16</i>      | 2.5                                   |
| <i>GOLM1</i>        | 2.5                                   |
| <i>TARS</i>         | 2.5                                   |
| <i>SNRNP40</i>      | 2.5                                   |
| <i>IRGQ</i>         | 2.5                                   |
| <i>GTPBP3</i>       | 2.5                                   |
| <i>DOLPP1</i>       | 2.5                                   |
| <i>PTMA</i>         | 2.5                                   |
| <i>KIAA1549</i>     | 2.5                                   |
| <i>EIF1AXP1</i>     | 2.5                                   |
| <i>TRIM28</i>       | 2.5                                   |
| <i>WDR31</i>        | 2.5                                   |
| <i>KIAA1467</i>     | 2.5                                   |
| <i>SRM</i>          | 2.5                                   |
| <i>FANCE</i>        | 2.5                                   |
| <i>KIAA1841</i>     | 2.5                                   |
| <i>RIF1</i>         | 2.5                                   |
| <i>UBE2E3</i>       | 2.5                                   |
| <i>CDC25B</i>       | 2.5                                   |
| <i>BPHL</i>         | 2.5                                   |
| <i>KDF1</i>         | 2.5                                   |
| <i>CDK2AP1</i>      | 2.4                                   |
| <i>HACE1</i>        | 2.4                                   |
| <i>RQCD1</i>        | 2.4                                   |
| <i>IFT122</i>       | 2.4                                   |
| <i>IVNS1ABP</i>     | 2.4                                   |
| <i>TIAM1</i>        | 2.4                                   |
| <i>SMC3</i>         | 2.4                                   |
| <i>AIF1L</i>        | 2.4                                   |
| <i>ANKRD18EP</i>    | 2.4                                   |
| <i>TRMT6</i>        | 2.4                                   |
| <i>BCL9</i>         | 2.4                                   |

| <b>Gene Name</b> | <b>Fold change relative to normal</b> |
|------------------|---------------------------------------|
| OCRL             | 2.4                                   |
| ACAP3            | 2.4                                   |
| PROSER1          | 2.4                                   |
| ACVR2B           | 2.4                                   |
| LSM14B           | 2.4                                   |
| GDF11            | 2.4                                   |
| XPOT             | 2.4                                   |
| TMED8            | 2.4                                   |
| CARHSP1          | 2.4                                   |
| DHX40            | 2.4                                   |
| CTDSPL2          | 2.4                                   |
| ALG6             | 2.4                                   |
| TLL5             | 2.4                                   |
| PTOV1            | 2.4                                   |
| STOML2           | 2.4                                   |
| SUGP2            | 2.4                                   |
| PHTF2            | 2.4                                   |
| PPP1R3E          | 2.4                                   |
| CLSTN1           | 2.4                                   |
| OLA1             | 2.4                                   |
| AHI1             | 2.4                                   |
| SPIRE2           | 2.4                                   |
| FBXL19-AS1       | 2.4                                   |
| LSM4             | 2.4                                   |
| HPSE             | 2.4                                   |
| LRRC58           | 2.4                                   |
| RPA2             | 2.4                                   |
| NGFRAP1          | 2.4                                   |
| CBX3             | 2.4                                   |
| PDIK1L           | 2.4                                   |
| CTPS2            | 2.4                                   |
| ZNF184           | 2.4                                   |
| TBCB             | 2.4                                   |
| ERI3             | 2.4                                   |
| IPP              | 2.4                                   |
| POT1             | 2.4                                   |
| MAZ              | 2.4                                   |
| INPPL1           | 2.4                                   |
| DVL3             | 2.4                                   |
| SSRP1            | 2.4                                   |
| MBNL3            | 2.4                                   |
| EXOC5            | 2.4                                   |
| DCAF16           | 2.4                                   |
| FYN              | 2.4                                   |
| HSPA14           | 2.4                                   |
| C7orf73          | 2.4                                   |
| ILF3             | 2.4                                   |
| FARSB            | 2.4                                   |
| PPME1            | 2.4                                   |
| AP4M1            | 2.4                                   |
| PGK1             | 2.3                                   |

| <b>Gene Name</b> | <b>Fold change relative to normal</b> |
|------------------|---------------------------------------|
| <i>PLEKHJ1</i>   | 2.3                                   |
| <i>H2AFV</i>     | 2.3                                   |
| <i>TAF2</i>      | 2.3                                   |
| <i>TNPO2</i>     | 2.3                                   |
| <i>SF3B3</i>     | 2.3                                   |
| <i>CASP2</i>     | 2.3                                   |
| <i>SIKE1</i>     | 2.3                                   |
| <i>CKB</i>       | 2.3                                   |
| <i>TADA1</i>     | 2.3                                   |
| <i>FAM136A</i>   | 2.3                                   |
| <i>ZNF48</i>     | 2.3                                   |
| <i>SMG9</i>      | 2.3                                   |
| <i>LRRC20</i>    | 2.3                                   |
| <i>RBMX</i>      | 2.3                                   |
| <i>MORF4L2</i>   | 2.3                                   |
| <i>ZNF292</i>    | 2.3                                   |
| <i>ZNF675</i>    | 2.3                                   |
| <i>PTAR1</i>     | 2.3                                   |
| <i>COIL</i>      | 2.3                                   |
| <i>ARHGEF16</i>  | 2.3                                   |
| <i>TUBGCP3</i>   | 2.3                                   |
| <i>CEBPG</i>     | 2.3                                   |
| <i>PRMT1</i>     | 2.3                                   |
| <i>RANBP1</i>    | 2.3                                   |
| <i>TBL1XR1</i>   | 2.3                                   |
| <i>SHFM1</i>     | 2.3                                   |
| <i>ZBTB41</i>    | 2.3                                   |
| <i>DNMT3A</i>    | 2.3                                   |
| <i>KNOP1</i>     | 2.3                                   |
| <i>ZNF275</i>    | 2.3                                   |
| <i>WDR5</i>      | 2.3                                   |
| <i>CMIP</i>      | 2.3                                   |
| <i>PYGO2</i>     | 2.3                                   |
| <i>PRUNE</i>     | 2.3                                   |
| <i>TCF3</i>      | 2.3                                   |
| <i>BUB3</i>      | 2.3                                   |
| <i>HDAC1</i>     | 2.3                                   |
| <i>NAB1</i>      | 2.3                                   |
| <i>USP18</i>     | 2.3                                   |
| <i>SGPL1</i>     | 2.3                                   |
| <i>ZNF664</i>    | 2.3                                   |
| <i>SLC25A40</i>  | 2.3                                   |
| <i>RALGPS1</i>   | 2.3                                   |
| <i>CPSF6</i>     | 2.3                                   |
| <i>KIAA1715</i>  | 2.3                                   |
| <i>HSPD1</i>     | 2.3                                   |
| <i>NUP43</i>     | 2.3                                   |
| <i>ZNF124</i>    | 2.3                                   |
| <i>PHC1</i>      | 2.3                                   |
| <i>FLAD1</i>     | 2.3                                   |
| <i>ST14</i>      | 2.3                                   |

| <b>Gene Name</b> | <b>Fold change relative to normal</b> |
|------------------|---------------------------------------|
| <i>CDK8</i>      | 2.3                                   |
| <i>DCAF12</i>    | 2.2                                   |
| <i>NLN</i>       | 2.2                                   |
| <i>UMPS</i>      | 2.2                                   |
| <i>ATXN7L3B</i>  | 2.2                                   |
| <i>HINFP</i>     | 2.2                                   |
| <i>TPI1</i>      | 2.2                                   |
| <i>H1FX</i>      | 2.2                                   |
| <i>FMR1</i>      | 2.2                                   |
| <i>NEDD1</i>     | 2.2                                   |
| <i>PLEKHB1</i>   | 2.2                                   |
| <i>RAD21</i>     | 2.2                                   |
| <i>PPM1D</i>     | 2.2                                   |
| <i>U2AF2</i>     | 2.2                                   |
| <i>CDK19</i>     | 2.2                                   |
| <i>PRMT5</i>     | 2.2                                   |
| <i>AP1S1</i>     | 2.2                                   |
| <i>IPO5</i>      | 2.2                                   |
| <i>MRPS26</i>    | 2.2                                   |
| <i>GPD2</i>      | 2.2                                   |
| <i>RAD1</i>      | 2.2                                   |
| <i>KDM5B</i>     | 2.2                                   |
| <i>CCT2</i>      | 2.2                                   |
| <i>KLHL42</i>    | 2.2                                   |
| <i>PRPF19</i>    | 2.2                                   |
| <i>BANF1</i>     | 2.2                                   |
| <i>PDZD11</i>    | 2.2                                   |
| <i>VPS35</i>     | 2.2                                   |
| <i>UNK</i>       | 2.2                                   |
| <i>STAG2</i>     | 2.2                                   |
| <i>RAVER2</i>    | 2.2                                   |
| <i>SET</i>       | 2.2                                   |
| <i>PHIP</i>      | 2.2                                   |
| <i>TXNL4A</i>    | 2.2                                   |
| <i>CERS4</i>     | 2.2                                   |
| <i>HNRNPR</i>    | 2.2                                   |
| <i>ENOPH1</i>    | 2.2                                   |
| <i>HAX1</i>      | 2.2                                   |
| <i>PRDX4</i>     | 2.2                                   |
| <i>HDGF</i>      | 2.2                                   |
| <i>TSN</i>       | 2.2                                   |
| <i>PKP4</i>      | 2.2                                   |
| <i>FOXRED1</i>   | 2.2                                   |
| <i>POMT2</i>     | 2.2                                   |
| <i>SPAST</i>     | 2.1                                   |
| <i>EXTL2</i>     | 2.1                                   |
| <i>FAM127B</i>   | 2.1                                   |
| <i>PCCB</i>      | 2.1                                   |
| <i>RBBP5</i>     | 2.1                                   |
| <i>ZCCHC11</i>   | 2.1                                   |
| <i>BTF3L4</i>    | 2.1                                   |

| <b>Gene Name</b> | <b>Fold change relative to normal</b> |
|------------------|---------------------------------------|
| <i>FXR1</i>      | 2.1                                   |
| <i>RNF144A</i>   | 2.1                                   |
| <i>PCNXL4</i>    | 2.1                                   |
| <i>SUMO2</i>     | 2.1                                   |
| <i>PPIF</i>      | 2.1                                   |
| <i>DNAJB11</i>   | 2.1                                   |
| <i>TROVE2</i>    | 2.1                                   |
| <i>ZBTB33</i>    | 2.1                                   |
| <i>PHLPP1</i>    | 2.1                                   |
| <i>NUCB2</i>     | 2.1                                   |
| <i>NUP188</i>    | 2.1                                   |
| <i>KLHDC3</i>    | 2.1                                   |
| <i>HNRNPA3</i>   | 2.1                                   |
| <i>UBE2O</i>     | 2.1                                   |
| <i>GSK3B</i>     | 2.1                                   |
| <i>TOP3A</i>     | 2.1                                   |
| <i>PNN</i>       | 2.1                                   |
| <i>ELK1</i>      | 2.1                                   |
| <i>HNRNPL</i>    | 2.1                                   |
| <i>ARID2</i>     | 2.1                                   |
| <i>VPS45</i>     | 2.1                                   |
| <i>SLC44A1</i>   | 2.1                                   |
| <i>PREP</i>      | 2.1                                   |
| <i>TMEM183A</i>  | 2.1                                   |
| <i>SLBP</i>      | 2.1                                   |
| <i>WSB2</i>      | 2.1                                   |
| <i>H3F3A</i>     | 2.1                                   |
| <i>HCFC1</i>     | 2.1                                   |
| <i>NAA50</i>     | 2.1                                   |
| <i>MORC4</i>     | 2.1                                   |
| <i>MRPL37</i>    | 2.1                                   |
| <i>FUBP1</i>     | 2.1                                   |
| <i>YWHAQ</i>     | 2.1                                   |
| <i>COPG2</i>     | 2.1                                   |
| <i>ZNF326</i>    | 2.1                                   |
| <i>S100PBP</i>   | 2.1                                   |
| <i>PAXIP1</i>    | 2.1                                   |
| <i>ELAVL1</i>    | 2.1                                   |
| <i>MAGED1</i>    | 2.1                                   |
| <i>NUDT21</i>    | 2.1                                   |
| <i>HYOU1</i>     | 2.0                                   |
| <i>RECQL</i>     | 2.0                                   |
| <i>NRAS</i>      | 2.0                                   |
| <i>SNRPC</i>     | 2.0                                   |
| <i>SUDS3</i>     | 2.0                                   |
| <i>RTN3</i>      | 2.0                                   |
| <i>APEX1</i>     | 2.0                                   |
| <i>ZNF146</i>    | 2.0                                   |
| <i>HSD17B10</i>  | 2.0                                   |
| <i>FZR1</i>      | 2.0                                   |
| <i>NELFCD</i>    | 2.0                                   |

| <b>Gene Name</b> | <b>Fold change relative to normal</b> |
|------------------|---------------------------------------|
| <i>XPO1</i>      | 2.0                                   |
| <i>TBL1X</i>     | 2.0                                   |
| <i>CCT6A</i>     | 2.0                                   |
| <i>FH</i>        | 2.0                                   |
| <i>FAM102B</i>   | 2.0                                   |
| <i>SEPTIN11</i>  | 2.0                                   |
| <i>ABI2</i>      | 2.0                                   |
| <i>MRPL3</i>     | 2.0                                   |
| <i>DHX9</i>      | 2.0                                   |
| <i>SMARCD1</i>   | 2.0                                   |
| <i>FOXK2</i>     | 2.0                                   |
| <i>RNF187</i>    | 2.0                                   |
| <i>LDOC1L</i>    | 2.0                                   |
| <i>STIP1</i>     | 2.0                                   |
| <i>GTF2A1</i>    | 2.0                                   |
| <i>NVL</i>       | 2.0                                   |
| <i>TOMM70A</i>   | 2.0                                   |
| <i>UBAP2L</i>    | 2.0                                   |
| <i>FOXJ3</i>     | 2.0                                   |
| <i>ATP9A</i>     | 2.0                                   |
| <i>TULP4</i>     | 2.0                                   |
| <i>CEP192</i>    | 2.0                                   |
| <i>STK35</i>     | 2.0                                   |
| <i>BAZ1B</i>     | 2.0                                   |
| <i>SLC1A5</i>    | 2.0                                   |
| <i>SMAD4</i>     | 2.0                                   |
| <i>PTBP1</i>     | 2.0                                   |
| <i>KIF1B</i>     | 2.0                                   |
| <i>LRP3</i>      | 2.0                                   |
| <i>TCP1</i>      | 2.0                                   |
| <i>IARS</i>      | 2.0                                   |
| <i>MTOR</i>      | 2.0                                   |
| <i>SAMD4B</i>    | 2.0                                   |
| <i>VDAC3</i>     | 2.0                                   |
| <i>GPI</i>       | 2.0                                   |
| <i>GTF3C4</i>    | 1.9                                   |
| <i>SF3A2</i>     | 1.9                                   |
| <i>XRCC5</i>     | 1.9                                   |
| <i>PHF14</i>     | 1.9                                   |
| <i>KHDRBS1</i>   | 1.9                                   |
| <i>ZNF532</i>    | 1.9                                   |
| <i>MEGF8</i>     | 1.9                                   |
| <i>PSMD2</i>     | 1.9                                   |
| <i>DNAJC10</i>   | 1.9                                   |
| <i>SIGMAR1</i>   | 1.9                                   |
| <i>SMG5</i>      | 1.9                                   |
| <i>SLC35B2</i>   | 1.9                                   |
| <i>HP1BP3</i>    | 1.9                                   |
| <i>SMARCA4</i>   | 1.9                                   |
| <i>NDUFB11</i>   | 1.9                                   |
| <i>DCAF7</i>     | 1.9                                   |

| <b>Gene Name</b> | <b>Fold change relative to normal</b> |
|------------------|---------------------------------------|
| <i>HUWE1</i>     | 1.9                                   |
| <i>CDKN1B</i>    | 1.9                                   |
| <i>ADNP</i>      | 1.9                                   |
| <i>KHSRP</i>     | 1.9                                   |
| <i>DENND1A</i>   | 1.9                                   |
| <i>TRIM33</i>    | 1.9                                   |
| <i>ZMYM2</i>     | 1.9                                   |
| <i>CDK5RAP2</i>  | 1.9                                   |
| <i>TPGS2</i>     | 1.9                                   |
| <i>ITM2C</i>     | 1.9                                   |
| <i>MTMR4</i>     | 1.9                                   |
| <i>AGO1</i>      | 1.9                                   |
| <i>SPIN1</i>     | 1.9                                   |
| <i>KCTD3</i>     | 1.9                                   |
| <i>AUTS2</i>     | 1.8                                   |
| <i>GID8</i>      | 1.8                                   |
| <i>GSE1</i>      | 1.8                                   |
| <i>SMPD4</i>     | 1.8                                   |
| <i>STRN4</i>     | 1.8                                   |
| <i>CDC5L</i>     | 1.8                                   |
| <i>TLK2</i>      | 1.8                                   |
| <i>FAM168A</i>   | 1.8                                   |
| <i>SMARCC1</i>   | 1.8                                   |
| <i>MIS18BP1</i>  | 1.8                                   |
| <i>ANKIB1</i>    | 1.8                                   |
| <i>HNRNPUL1</i>  | 1.8                                   |
| <i>NCOA6</i>     | 1.7                                   |
| <i>PHACTR4</i>   | 1.7                                   |

**Supplementary Table 4: List of downregulated genes with fold change relative to normal**

| <b>Gene Name</b>     | <b>Fold change relative to normal</b> |
|----------------------|---------------------------------------|
| <i>C8B</i>           | 0.002                                 |
| <i>RP11-77A13.1</i>  | 0.003                                 |
| <i>MCEMP1</i>        | 0.003                                 |
| <i>KRT14</i>         | 0.003                                 |
| <i>FABP4</i>         | 0.004                                 |
| <i>CSF3</i>          | 0.004                                 |
| <i>RETN</i>          | 0.005                                 |
| <i>KRT1</i>          | 0.008                                 |
| <i>CHIAP2</i>        | 0.008                                 |
| <i>CXCL5</i>         | 0.008                                 |
| <i>GPA33</i>         | 0.008                                 |
| <i>CYP1A1</i>        | 0.008                                 |
| <i>RP5-839B4.8</i>   | 0.008                                 |
| <i>MARCO</i>         | 0.009                                 |
| <i>SFTPC</i>         | 0.009                                 |
| <i>CPB2</i>          | 0.010                                 |
| <i>SLC19A3</i>       | 0.011                                 |
| <i>HMGCS2</i>        | 0.011                                 |
| <i>CYP1A2</i>        | 0.011                                 |
| <i>GPIHBP1</i>       | 0.011                                 |
| <i>LGI3</i>          | 0.011                                 |
| <i>WIF1</i>          | 0.012                                 |
| <i>HBG2</i>          | 0.012                                 |
| <i>ITLN2</i>         | 0.012                                 |
| <i>GPD1</i>          | 0.012                                 |
| <i>FOSB</i>          | 0.012                                 |
| <i>SLC46A2</i>       | 0.013                                 |
| <i>DSG3</i>          | 0.013                                 |
| <i>ANKRD1</i>        | 0.014                                 |
| <i>C18orf63</i>      | 0.014                                 |
| <i>RP11-613D13.8</i> | 0.014                                 |
| <i>TREM1</i>         | 0.014                                 |
| <i>AGER</i>          | 0.014                                 |
| <i>C10orf99</i>      | 0.015                                 |
| <i>FGA</i>           | 0.015                                 |
| <i>FOLR3</i>         | 0.015                                 |
| <i>GDF10</i>         | 0.016                                 |
| <i>HBA2</i>          | 0.016                                 |
| <i>OLR1</i>          | 0.016                                 |
| <i>CD300LG</i>       | 0.016                                 |
| <i>CTB-134H23.3</i>  | 0.016                                 |
| <i>CES1</i>          | 0.017                                 |
| <i>CXCL2</i>         | 0.017                                 |
| <i>PEBP4</i>         | 0.017                                 |
| <i>RP11-635O16.2</i> | 0.017                                 |



| <b>Gene Name</b>     | <b>Fold change relative to normal</b> |
|----------------------|---------------------------------------|
| <i>PPBP</i>          | 0.018                                 |
| <i>FPR2</i>          | 0.018                                 |
| <i>SHH</i>           | 0.018                                 |
| <i>CTD-3080P12.3</i> | 0.018                                 |
| <i>RP11-528A4.2</i>  | 0.018                                 |
| <i>RASGRF1</i>       | 0.018                                 |
| <i>ODAM</i>          | 0.018                                 |
| <i>SERPIND1</i>      | 0.019                                 |
| <i>ITLN1</i>         | 0.019                                 |
| <i>GGTLC1</i>        | 0.019                                 |
| <i>RP11-701P16.5</i> | 0.019                                 |
| <i>RP11-238K6.1</i>  | 0.020                                 |
| <i>PGC</i>           | 0.020                                 |
| <i>VSIG4</i>         | 0.020                                 |
| <i>RP11-302F12.1</i> | 0.020                                 |
| <i>TMEM213</i>       | 0.020                                 |
| <i>SFTPA1</i>        | 0.020                                 |
| <i>SCGB3A1</i>       | 0.021                                 |
| <i>ALOX15B</i>       | 0.021                                 |
| <i>HCAR2</i>         | 0.021                                 |
| <i>AC008268.1</i>    | 0.021                                 |
| <i>AP002856.5</i>    | 0.021                                 |
| <i>ADRB2</i>         | 0.021                                 |
| <i>CYP2B7P</i>       | 0.021                                 |
| <i>KRT16</i>         | 0.021                                 |
| <i>CLDN18</i>        | 0.021                                 |
| <i>PLA2G1B</i>       | 0.022                                 |
| <i>RBP4</i>          | 0.022                                 |
| <i>SFTPA2</i>        | 0.022                                 |
| <i>S100A7</i>        | 0.022                                 |
| <i>RP11-357D18.1</i> | 0.022                                 |
| <i>UPK3B</i>         | 0.022                                 |
| <i>SPRR2G</i>        | 0.022                                 |
| <i>MSLN</i>          | 0.022                                 |
| <i>CXCL3</i>         | 0.022                                 |
| <i>RP11-164O23.8</i> | 0.022                                 |
| <i>S100A8</i>        | 0.022                                 |
| <i>C4BPA</i>         | 0.023                                 |
| <i>ECEL1P2</i>       | 0.023                                 |
| <i>RSPO2</i>         | 0.023                                 |
| <i>STEAP4</i>        | 0.023                                 |
| <i>CD5L</i>          | 0.023                                 |
| <i>ANXA8L2</i>       | 0.023                                 |
| <i>TNNC1</i>         | 0.024                                 |
| <i>RPL13AP17</i>     | 0.024                                 |
| <i>RP11-325F22.5</i> | 0.024                                 |
| <i>MRC1</i>          | 0.024                                 |

| <b>Gene Name</b>     | <b>Fold change relative to normal</b> |
|----------------------|---------------------------------------|
| <i>RN7SL8P</i>       | 0.024                                 |
| <i>RXFP2</i>         | 0.024                                 |
| <i>XAGE2B</i>        | 0.024                                 |
| <i>AC079630.4</i>    | 0.024                                 |
| <i>FGG</i>           | 0.024                                 |
| <i>AGRP</i>          | 0.024                                 |
| <i>GKN2</i>          | 0.025                                 |
| <i>LINC01272</i>     | 0.025                                 |
| <i>OVCH2</i>         | 0.025                                 |
| <i>ACADL</i>         | 0.025                                 |
| <i>TCF21</i>         | 0.025                                 |
| <i>CTD-2369P2.8</i>  | 0.025                                 |
| <i>F11</i>           | 0.025                                 |
| <i>VEPH1</i>         | 0.026                                 |
| <i>RBPM5-AS1</i>     | 0.026                                 |
| <i>HBA1</i>          | 0.026                                 |
| <i>NAPSA</i>         | 0.026                                 |
| <i>HHIP</i>          | 0.026                                 |
| <i>LINC01314</i>     | 0.026                                 |
| <i>SFTPD</i>         | 0.026                                 |
| <i>RP11-20D14.6</i>  | 0.027                                 |
| <i>KRT6A</i>         | 0.027                                 |
| <i>LINC00844</i>     | 0.027                                 |
| <i>CTD-2589M5.4</i>  | 0.027                                 |
| <i>CEACAM8</i>       | 0.027                                 |
| <i>CD36</i>          | 0.027                                 |
| <i>GSTA3</i>         | 0.027                                 |
| <i>RP11-544M22.1</i> | 0.027                                 |
| <i>SIGLEC11</i>      | 0.027                                 |
| <i>C16orf89</i>      | 0.027                                 |
| <i>RP11-88I21.2</i>  | 0.027                                 |
| <i>RP11-141J13.5</i> | 0.027                                 |
| <i>CH17-360D5.2</i>  | 0.027                                 |
| <i>KRT16P1</i>       | 0.028                                 |
| <i>WNT7A</i>         | 0.028                                 |
| <i>SLC11A1</i>       | 0.028                                 |
| <i>CAV1</i>          | 0.028                                 |
| <i>PF4</i>           | 0.028                                 |
| <i>SFTA1P</i>        | 0.028                                 |
| <i>RP11-422N16.3</i> | 0.028                                 |
| <i>SCEL</i>          | 0.029                                 |
| <i>GSTA2</i>         | 0.029                                 |
| <i>PPARG</i>         | 0.029                                 |
| <i>AC002066.1</i>    | 0.029                                 |
| <i>SLPI</i>          | 0.029                                 |
| <i>XXyac-YM21GA2</i> | 0.029                                 |
| <i>EMR1</i>          | 0.029                                 |

| <b>Gene Name</b>     | <b>Fold change relative to normal</b> |
|----------------------|---------------------------------------|
| <i>ADAMTS7P3</i>     | 0.030                                 |
| <i>CHIA</i>          | 0.030                                 |
| <i>OVCH1</i>         | 0.030                                 |
| <i>SCGB1A1</i>       | 0.030                                 |
| <i>TPSB2</i>         | 0.030                                 |
| <i>TPSAB1</i>        | 0.030                                 |
| <i>CNTN6</i>         | 0.031                                 |
| <i>ADAMTS9-AS1</i>   | 0.031                                 |
| <i>SUSD2</i>         | 0.031                                 |
| <i>CCL23</i>         | 0.031                                 |
| <i>NALCN-AS1</i>     | 0.031                                 |
| <i>HP</i>            | 0.031                                 |
| <i>ALOX5AP</i>       | 0.031                                 |
| <i>MGC27382</i>      | 0.031                                 |
| <i>AQP9</i>          | 0.031                                 |
| <i>HBB</i>           | 0.031                                 |
| <i>PLA2G4F</i>       | 0.032                                 |
| <i>KRT79</i>         | 0.032                                 |
| <i>CPAMD8</i>        | 0.032                                 |
| <i>ANGPT4</i>        | 0.032                                 |
| <i>RP11-476D10.1</i> | 0.032                                 |
| <i>SDPR</i>          | 0.032                                 |
| <i>ANXA8</i>         | 0.032                                 |
| <i>HYAL1</i>         | 0.032                                 |
| <i>RP11-664D7.4</i>  | 0.032                                 |
| <i>ADH1B</i>         | 0.032                                 |
| <i>ZDHHC19</i>       | 0.032                                 |
| <i>SLC34A2</i>       | 0.033                                 |
| <i>CFTR</i>          | 0.033                                 |
| <i>ALPP</i>          | 0.033                                 |
| <i>CTD-2015H3.2</i>  | 0.033                                 |
| <i>RP5-1103B4.3</i>  | 0.033                                 |
| <i>EPGN</i>          | 0.033                                 |
| <i>ABCA8</i>         | 0.033                                 |
| <i>CCL20</i>         | 0.033                                 |
| <i>WFDC5</i>         | 0.033                                 |
| <i>SEC14L3</i>       | 0.033                                 |
| <i>EDN3</i>          | 0.034                                 |
| <i>SLC22A3</i>       | 0.034                                 |
| <i>LEPREL1</i>       | 0.034                                 |
| <i>AQP3</i>          | 0.034                                 |
| <i>RP11-352D13.6</i> | 0.034                                 |
| <i>NTN4</i>          | 0.034                                 |
| <i>RP11-357P18.2</i> | 0.034                                 |
| <i>RP11-133L19.3</i> | 0.034                                 |
| <i>MUC15</i>         | 0.034                                 |
| <i>APOH</i>          | 0.035                                 |

| <b>Gene Name</b>    | <b>Fold change relative to normal</b> |
|---------------------|---------------------------------------|
| <i>HBM</i>          | 0.035                                 |
| <i>SYNC</i>         | 0.035                                 |
| <i>SEC14L6</i>      | 0.035                                 |
| <i>AC079630.2</i>   | 0.035                                 |
| <i>PIGR</i>         | 0.035                                 |
| <i>TRHDE</i>        | 0.035                                 |
| <i>FGFBP2</i>       | 0.035                                 |
| <i>ATOH8</i>        | 0.035                                 |
| <i>CAMP</i>         | 0.035                                 |
| <i>FCGR3B</i>       | 0.035                                 |
| <i>SELE</i>         | 0.035                                 |
| <i>ATP13A4</i>      | 0.035                                 |
| <i>RP11-251M1.1</i> | 0.036                                 |
| <i>RSPO1</i>        | 0.036                                 |
| <i>SGMS2</i>        | 0.036                                 |
| <i>MT1JP</i>        | 0.036                                 |
| <i>TNNI2</i>        | 0.036                                 |
| <i>RP11-403A3.3</i> | 0.036                                 |
| <i>FPR1</i>         | 0.036                                 |
| <i>SCARA5</i>       | 0.036                                 |
| <i>SPRR3</i>        | 0.036                                 |
| <i>MYO16-AS1</i>    | 0.036                                 |
| <i>FCER1A</i>       | 0.037                                 |
| <i>ALPPL2</i>       | 0.037                                 |
| <i>CCDC141</i>      | 0.037                                 |
| <i>RP11-789C1.1</i> | 0.037                                 |
| <i>CYP4B1</i>       | 0.037                                 |
| <i>AC007970.1</i>   | 0.037                                 |
| <i>LINC00656</i>    | 0.037                                 |
| <i>CD300C</i>       | 0.037                                 |
| <i>AQP4</i>         | 0.037                                 |
| <i>AREG</i>         | 0.037                                 |
| <i>GYPE</i>         | 0.037                                 |
| <i>CYP4Z2P</i>      | 0.037                                 |
| <i>FIGF</i>         | 0.038                                 |
| <i>SFTPB</i>        | 0.038                                 |
| <i>BTNL9</i>        | 0.038                                 |
| <i>LRRK2</i>        | 0.038                                 |
| <i>FOLR1</i>        | 0.038                                 |
| <i>DLC1</i>         | 0.038                                 |
| <i>CAV2</i>         | 0.038                                 |
| <i>INMT</i>         | 0.038                                 |
| <i>ADTRP</i>        | 0.038                                 |
| <i>C2orf91</i>      | 0.038                                 |
| <i>NTF4</i>         | 0.038                                 |
| <i>AQP7</i>         | 0.038                                 |
| <i>GPRC5A</i>       | 0.038                                 |

| <b>Gene Name</b>     | <b>Fold change relative to normal</b> |
|----------------------|---------------------------------------|
| <i>AGBL1</i>         | 0.038                                 |
| <i>WFDC12</i>        | 0.038                                 |
| <i>DSG1</i>          | 0.038                                 |
| <i>KRT6C</i>         | 0.039                                 |
| <i>CHRNA2</i>        | 0.039                                 |
| <i>TMPRSS2</i>       | 0.039                                 |
| <i>AC092071.1</i>    | 0.039                                 |
| <i>S100A9</i>        | 0.039                                 |
| <i>KCNJ15</i>        | 0.039                                 |
| <i>PTPRQ</i>         | 0.039                                 |
| <i>CFD</i>           | 0.039                                 |
| <i>KRT16P2</i>       | 0.039                                 |
| <i>CLCA2</i>         | 0.039                                 |
| <i>RP11-85G21.3</i>  | 0.039                                 |
| <i>BTNL8</i>         | 0.039                                 |
| <i>CHI3L2</i>        | 0.039                                 |
| <i>WNT3A</i>         | 0.039                                 |
| <i>ADRA1A</i>        | 0.040                                 |
| <i>HAS1</i>          | 0.040                                 |
| <i>TRIM71</i>        | 0.040                                 |
| <i>S100A12</i>       | 0.040                                 |
| <i>RP1-251M9.3</i>   | 0.040                                 |
| <i>PRX</i>           | 0.040                                 |
| <i>FCN3</i>          | 0.040                                 |
| <i>CLEC3B</i>        | 0.040                                 |
| <i>HSPB3</i>         | 0.040                                 |
| <i>NPR1</i>          | 0.040                                 |
| <i>PLA2G4E</i>       | 0.040                                 |
| <i>RP1-35C21.1</i>   | 0.040                                 |
| <i>EGR1</i>          | 0.040                                 |
| <i>RP3-460G2.2</i>   | 0.041                                 |
| <i>CLIC3</i>         | 0.041                                 |
| <i>LINC01146</i>     | 0.041                                 |
| <i>LINC00968</i>     | 0.041                                 |
| <i>HCAR3</i>         | 0.041                                 |
| <i>C2orf71</i>       | 0.041                                 |
| <i>RP11-213H15.1</i> | 0.041                                 |
| <i>KRT24</i>         | 0.041                                 |
| <i>RP11-720L2.4</i>  | 0.041                                 |
| <i>FGF10</i>         | 0.041                                 |
| <i>DMBT1</i>         | 0.042                                 |
| <i>AKR1C3</i>        | 0.042                                 |
| <i>ADH1A</i>         | 0.042                                 |
| <i>ANKRD29</i>       | 0.042                                 |
| <i>FGFR4</i>         | 0.042                                 |
| <i>CLEC12A</i>       | 0.042                                 |
| <i>IL1A</i>          | 0.042                                 |

| <b>Gene Name</b>     | <b>Fold change relative to normal</b> |
|----------------------|---------------------------------------|
| <i>AWAT2</i>         | 0.042                                 |
| <i>SCGB3A2</i>       | 0.042                                 |
| <i>IL1RL1</i>        | 0.042                                 |
| <i>FAM107A</i>       | 0.042                                 |
| <i>CYS1</i>          | 0.042                                 |
| <i>SOCS3</i>         | 0.042                                 |
| <i>ALAS2</i>         | 0.042                                 |
| <i>C11orf96</i>      | 0.043                                 |
| <i>LAMP3</i>         | 0.043                                 |
| <i>DPEP2</i>         | 0.043                                 |
| <i>SLC1A1</i>        | 0.043                                 |
| <i>CSF3R</i>         | 0.043                                 |
| <i>SIRPB1</i>        | 0.043                                 |
| <i>AMZ1</i>          | 0.043                                 |
| <i>IL6</i>           | 0.043                                 |
| <i>RP11-286H15.1</i> | 0.043                                 |
| <i>DEFA3</i>         | 0.043                                 |
| <i>ALDH2</i>         | 0.043                                 |
| <i>RP11-79H23.3</i>  | 0.044                                 |
| <i>LILRB3</i>        | 0.044                                 |
| <i>TDRD10</i>        | 0.044                                 |
| <i>ST8SIA6</i>       | 0.044                                 |
| <i>PRAM1</i>         | 0.044                                 |
| <i>ANXA3</i>         | 0.044                                 |
| <i>FAM150B</i>       | 0.044                                 |
| <i>AC093110.3</i>    | 0.045                                 |
| <i>CTSH</i>          | 0.045                                 |
| <i>ZMYND15</i>       | 0.045                                 |
| <i>MATN3</i>         | 0.045                                 |
| <i>MS4A2</i>         | 0.045                                 |
| <i>CH17-360D5.3</i>  | 0.045                                 |
| <i>ZFP36</i>         | 0.045                                 |
| <i>HHIP-AS1</i>      | 0.045                                 |
| <i>SLC22A31</i>      | 0.045                                 |
| <i>GADD45B</i>       | 0.045                                 |
| <i>SLC39A8</i>       | 0.045                                 |
| <i>AC090616.2</i>    | 0.045                                 |
| <i>PLBD1</i>         | 0.045                                 |
| <i>TBX2-AS1</i>      | 0.046                                 |
| <i>GALNT5</i>        | 0.046                                 |
| <i>HPR</i>           | 0.046                                 |
| <i>CTD-3107M8.2</i>  | 0.046                                 |
| <i>FMO2</i>          | 0.046                                 |
| <i>MSR1</i>          | 0.046                                 |
| <i>CLEC1B</i>        | 0.046                                 |
| <i>SYT15</i>         | 0.046                                 |
| <i>AC006273.5</i>    | 0.046                                 |

| <b>Gene Name</b>     | <b>Fold change relative to normal</b> |
|----------------------|---------------------------------------|
| <i>PLA2G2A</i>       | 0.046                                 |
| <i>CCIN</i>          | 0.046                                 |
| <i>OR52K3P</i>       | 0.046                                 |
| <i>VMO1</i>          | 0.046                                 |
| <i>MT1A</i>          | 0.047                                 |
| <i>MYOC</i>          | 0.047                                 |
| <i>CTD-2135D7.5</i>  | 0.047                                 |
| <i>SCTR</i>          | 0.047                                 |
| <i>ADAMTS8</i>       | 0.047                                 |
| <i>EDNRB</i>         | 0.047                                 |
| <i>TMEM139</i>       | 0.047                                 |
| <i>HPGDS</i>         | 0.047                                 |
| <i>CTB-167B5.2</i>   | 0.047                                 |
| <i>TMEM52B</i>       | 0.047                                 |
| <i>SLC6A4</i>        | 0.047                                 |
| <i>CXCR2</i>         | 0.047                                 |
| <i>SFTA2</i>         | 0.048                                 |
| <i>IRX6</i>          | 0.048                                 |
| <i>TMEM150B</i>      | 0.048                                 |
| <i>KNDC1</i>         | 0.048                                 |
| <i>RP11-462G2.1</i>  | 0.048                                 |
| <i>CPA3</i>          | 0.048                                 |
| <i>FOS</i>           | 0.048                                 |
| <i>PRG4</i>          | 0.048                                 |
| <i>PTCRA</i>         | 0.048                                 |
| <i>RP11-35J10.6</i>  | 0.048                                 |
| <i>DCSTAMP</i>       | 0.048                                 |
| <i>SERPINA1</i>      | 0.048                                 |
| <i>SPINK6</i>        | 0.048                                 |
| <i>RBMS3-AS3</i>     | 0.048                                 |
| <i>GP9</i>           | 0.049                                 |
| <i>CH25H</i>         | 0.049                                 |
| <i>GPR116</i>        | 0.049                                 |
| <i>ANPEP</i>         | 0.049                                 |
| <i>RP11-359N11.1</i> | 0.049                                 |
| <i>C8A</i>           | 0.049                                 |
| <i>SYNDIG1L</i>      | 0.049                                 |
| <i>BNC1</i>          | 0.049                                 |
| <i>RXFP1</i>         | 0.049                                 |
| <i>C1orf162</i>      | 0.049                                 |
| <i>EGR2</i>          | 0.049                                 |
| <i>RP11-293P20.2</i> | 0.050                                 |
| <i>FGR</i>           | 0.050                                 |
| <i>ALPL</i>          | 0.050                                 |
| <i>GGTLC2</i>        | 0.050                                 |
| <i>RASGRP4</i>       | 0.050                                 |
| <i>CXCR1</i>         | 0.050                                 |

| <b>Gene Name</b>     | <b>Fold change relative to normal</b> |
|----------------------|---------------------------------------|
| <i>MYRF</i>          | 0.050                                 |
| <i>HOPX</i>          | 0.050                                 |
| <i>CTC-573N18.1</i>  | 0.050                                 |
| <i>CASP14</i>        | 0.050                                 |
| <i>ABCC6</i>         | 0.050                                 |
| <i>NXF3</i>          | 0.051                                 |
| <i>GPX3</i>          | 0.051                                 |
| <i>AGTR2</i>         | 0.051                                 |
| <i>SDR16C5</i>       | 0.051                                 |
| <i>RP11-125O18.1</i> | 0.051                                 |
| <i>ZNF812</i>        | 0.051                                 |
| <i>FHL5</i>          | 0.051                                 |
| <i>GSTM5</i>         | 0.051                                 |
| <i>C1orf116</i>      | 0.051                                 |
| <i>LRP2</i>          | 0.051                                 |
| <i>MMP19</i>         | 0.051                                 |
| <i>HK3</i>           | 0.052                                 |
| <i>IYD</i>           | 0.052                                 |
| <i>AMICA1</i>        | 0.052                                 |
| <i>AC013264.2</i>    | 0.052                                 |
| <i>ITIH5</i>         | 0.052                                 |
| <i>NDNF</i>          | 0.052                                 |
| <i>AC064834.3</i>    | 0.052                                 |
| <i>LRRN4</i>         | 0.052                                 |
| <i>NLRC4</i>         | 0.052                                 |
| <i>RP11-434D9.1</i>  | 0.052                                 |
| <i>CCND2-AS1</i>     | 0.052                                 |
| <i>SIGLEC5</i>       | 0.052                                 |
| <i>HPGD</i>          | 0.053                                 |
| <i>DOK2</i>          | 0.053                                 |
| <i>RP11-470M17.2</i> | 0.053                                 |
| <i>LINC00551</i>     | 0.053                                 |
| <i>PTGDS</i>         | 0.053                                 |
| <i>CRTAC1</i>        | 0.053                                 |
| <i>NCF2</i>          | 0.053                                 |
| <i>CSRNP1</i>        | 0.054                                 |
| <i>RP11-354E11.2</i> | 0.054                                 |
| <i>HNF1B</i>         | 0.054                                 |
| <i>FBP1</i>          | 0.054                                 |
| <i>TMEM236</i>       | 0.054                                 |
| <i>CDH19</i>         | 0.054                                 |
| <i>FOSL1</i>         | 0.054                                 |
| <i>AC098828.3</i>    | 0.054                                 |
| <i>TNXA</i>          | 0.054                                 |
| <i>DIO3OS</i>        | 0.054                                 |
| <i>CATSPERD</i>      | 0.054                                 |
| <i>VGLL1</i>         | 0.054                                 |



| <b>Gene Name</b>     | <b>Fold change relative to normal</b> |
|----------------------|---------------------------------------|
| <i>RP11-246K15.1</i> | 0.054                                 |
| <i>COLEC12</i>       | 0.054                                 |
| <i>ROS1</i>          | 0.054                                 |
| <i>HBD</i>           | 0.054                                 |
| <i>ZBED2</i>         | 0.054                                 |
| <i>CCL17</i>         | 0.054                                 |
| <i>SPRR1B</i>        | 0.055                                 |
| <i>AC011899.9</i>    | 0.055                                 |
| <i>GPR17</i>         | 0.055                                 |
| <i>GPX1P1</i>        | 0.055                                 |
| <i>PTPLA</i>         | 0.055                                 |
| <i>SHE</i>           | 0.055                                 |
| <i>GATA6</i>         | 0.055                                 |
| <i>TEK</i>           | 0.055                                 |
| <i>REG1A</i>         | 0.056                                 |
| <i>ICAM1</i>         | 0.056                                 |
| <i>CXCL16</i>        | 0.056                                 |
| <i>SLC4A1</i>        | 0.056                                 |
| <i>RP11-805I24.3</i> | 0.056                                 |
| <i>TPSD1</i>         | 0.056                                 |
| <i>KHDRBS2</i>       | 0.056                                 |
| <i>OR2S1P</i>        | 0.056                                 |
| <i>AOC3</i>          | 0.056                                 |
| <i>HSD17B6</i>       | 0.056                                 |
| <i>ARHGAP31</i>      | 0.056                                 |
| <i>CD52</i>          | 0.056                                 |
| <i>RP1-186E20.1</i>  | 0.056                                 |
| <i>DUSP1</i>         | 0.056                                 |
| <i>RNASE4</i>        | 0.057                                 |
| <i>SPI1</i>          | 0.057                                 |
| <i>PLAC9</i>         | 0.057                                 |
| <i>TGFBR2</i>        | 0.057                                 |
| <i>STX11</i>         | 0.057                                 |
| <i>PCDH15</i>        | 0.057                                 |
| <i>CLEC12B</i>       | 0.057                                 |
| <i>CYP1B1-AS1</i>    | 0.057                                 |
| <i>S100A4</i>        | 0.057                                 |
| <i>FGB</i>           | 0.057                                 |
| <i>SCN7A</i>         | 0.057                                 |
| <i>HLA-DRB5</i>      | 0.057                                 |
| <i>PNMT</i>          | 0.057                                 |
| <i>SIGLEC1</i>       | 0.057                                 |
| <i>ADAMTSL4</i>      | 0.057                                 |
| <i>GPR126</i>        | 0.057                                 |
| <i>NFKBIZ</i>        | 0.058                                 |
| <i>KANK3</i>         | 0.058                                 |
| <i>RP11-371A19.2</i> | 0.058                                 |

| <b>Gene Name</b>      | <b>Fold change relative to normal</b> |
|-----------------------|---------------------------------------|
| <i>CD33</i>           | 0.058                                 |
| <i>RP3-462E2.3</i>    | 0.058                                 |
| <i>DRAM1</i>          | 0.058                                 |
| <i>RP11-1024P17.1</i> | 0.058                                 |
| <i>FGD5</i>           | 0.058                                 |
| <i>CD163</i>          | 0.058                                 |
| <i>EREG</i>           | 0.058                                 |
| <i>LINC01108</i>      | 0.058                                 |
| <i>SLC6A14</i>        | 0.058                                 |
| <i>CTSPLP8</i>        | 0.059                                 |
| <i>SERPINB7</i>       | 0.059                                 |
| <i>HBG1</i>           | 0.059                                 |
| <i>KLF2</i>           | 0.059                                 |
| <i>SLC5A9</i>         | 0.059                                 |
| <i>RP11-206P5.2</i>   | 0.059                                 |
| <i>EPAS1</i>          | 0.059                                 |
| <i>RP11-750H9.5</i>   | 0.059                                 |
| <i>SIGLEC17P</i>      | 0.059                                 |
| <i>GSTA1</i>          | 0.060                                 |
| <i>RP1-240B8.3</i>    | 0.060                                 |
| <i>RRAD</i>           | 0.060                                 |
| <i>SULT1A2</i>        | 0.060                                 |
| <i>MALL</i>           | 0.060                                 |
| <i>TMEM100</i>        | 0.060                                 |
| <i>PADI4</i>          | 0.060                                 |
| <i>ALDH3B1</i>        | 0.060                                 |
| <i>SH3RF2</i>         | 0.060                                 |
| <i>RP11-287F9.2</i>   | 0.060                                 |
| <i>SPOCD1</i>         | 0.060                                 |
| <i>AQP1</i>           | 0.060                                 |
| <i>SELENBP1</i>       | 0.061                                 |
| <i>CMTM5</i>          | 0.061                                 |
| <i>AC079467.1</i>     | 0.061                                 |
| <i>BMP3</i>           | 0.061                                 |
| <i>GATA1</i>          | 0.061                                 |
| <i>HLA-DRB1</i>       | 0.061                                 |
| <i>OSCAR</i>          | 0.062                                 |
| <i>LY86</i>           | 0.062                                 |
| <i>WWC2-AS2</i>       | 0.062                                 |
| <i>RP11-76E17.3</i>   | 0.062                                 |
| <i>NLRP12</i>         | 0.062                                 |
| <i>TACSTD2</i>        | 0.062                                 |
| <i>RP11-1008C21.1</i> | 0.062                                 |
| <i>RP1-78O14.1</i>    | 0.062                                 |
| <i>CLIC5</i>          | 0.062                                 |
| <i>CTD-2306A12.1</i>  | 0.063                                 |
| <i>FLRT3</i>          | 0.063                                 |

| <b>Gene Name</b>     | <b>Fold change relative to normal</b> |
|----------------------|---------------------------------------|
| <i>RP11-274B18.2</i> | 0.063                                 |
| <i>ORM1</i>          | 0.063                                 |
| <i>TMPRSS11D</i>     | 0.063                                 |
| <i>ICAM5</i>         | 0.063                                 |
| <i>ZNF385B</i>       | 0.063                                 |
| <i>CA3</i>           | 0.063                                 |
| <i>GLIPR2</i>        | 0.063                                 |
| <i>RGCC</i>          | 0.063                                 |
| <i>CA2</i>           | 0.063                                 |
| <i>C1QA</i>          | 0.063                                 |
| <i>AP001626.1</i>    | 0.064                                 |
| <i>SLC6A13</i>       | 0.064                                 |
| <i>GATA6-AS1</i>     | 0.064                                 |
| <i>GYPE</i>          | 0.064                                 |
| <i>CATSPER1</i>      | 0.064                                 |
| <i>RP11-101E5.1</i>  | 0.064                                 |
| <i>MFAP4</i>         | 0.064                                 |
| <i>EDN1</i>          | 0.064                                 |
| <i>ANGPT1</i>        | 0.064                                 |
| <i>AC019117.1</i>    | 0.064                                 |
| <i>ADAMTS9-AS2</i>   | 0.065                                 |
| <i>CTA-363E6.2</i>   | 0.065                                 |
| <i>FAM189A2</i>      | 0.065                                 |
| <i>IL6R</i>          | 0.065                                 |
| <i>C1QB</i>          | 0.065                                 |
| <i>RP11-526F3.1</i>  | 0.065                                 |
| <i>TMEM92</i>        | 0.065                                 |
| <i>DPYS</i>          | 0.065                                 |
| <i>KRT16P3</i>       | 0.065                                 |
| <i>TLR2</i>          | 0.065                                 |
| <i>CACNA2D2</i>      | 0.065                                 |
| <i>LIPH</i>          | 0.065                                 |
| <i>CYBRD1</i>        | 0.065                                 |
| <i>LYVE1</i>         | 0.065                                 |
| <i>RP11-35J10.7</i>  | 0.065                                 |
| <i>ADH7</i>          | 0.065                                 |
| <i>ITGAM</i>         | 0.066                                 |
| <i>HBEGF</i>         | 0.066                                 |
| <i>ADRB1</i>         | 0.066                                 |
| <i>MIR223</i>        | 0.066                                 |
| <i>RP11-815M8.1</i>  | 0.066                                 |
| <i>EMR3</i>          | 0.066                                 |
| <i>CSF2</i>          | 0.066                                 |
| <i>CPM</i>           | 0.066                                 |
| <i>C8orf34</i>       | 0.066                                 |
| <i>THBD</i>          | 0.066                                 |
| <i>GUCA2A</i>        | 0.067                                 |

| <b>Gene Name</b>     | <b>Fold change relative to normal</b> |
|----------------------|---------------------------------------|
| <i>FFAR4</i>         | 0.067                                 |
| <i>MNDA</i>          | 0.067                                 |
| <i>LINC01186</i>     | 0.067                                 |
| <i>PDLIM2</i>        | 0.067                                 |
| <i>RP11-317J10.2</i> | 0.067                                 |
| <i>PLA2G12B</i>      | 0.067                                 |
| <i>AC007182.6</i>    | 0.067                                 |
| <i>BHLHE41</i>       | 0.067                                 |
| <i>LINC00694</i>     | 0.067                                 |
| <i>SPATA20P1</i>     | 0.067                                 |
| <i>LINC00842</i>     | 0.067                                 |
| <i>AC093787.1</i>    | 0.067                                 |
| <i>CYP2S1</i>        | 0.067                                 |
| <i>MICA</i>          | 0.068                                 |
| <i>RP11-720L2.3</i>  | 0.068                                 |
| <i>PROS1</i>         | 0.068                                 |
| <i>TMEM132C</i>      | 0.068                                 |
| <i>WWC2</i>          | 0.068                                 |
| <i>RP11-452C13.1</i> | 0.068                                 |
| <i>RND1</i>          | 0.068                                 |
| <i>SIGLEC22P</i>     | 0.068                                 |
| <i>MAP1LC3C</i>      | 0.068                                 |
| <i>KRT4</i>          | 0.068                                 |
| <i>TNNT3</i>         | 0.069                                 |
| <i>RP11-655M14.4</i> | 0.069                                 |
| <i>AHNAK</i>         | 0.069                                 |
| <i>MFAP3L</i>        | 0.069                                 |
| <i>YAP1</i>          | 0.069                                 |
| <i>PDE1B</i>         | 0.069                                 |
| <i>SLC7A7</i>        | 0.069                                 |
| <i>CAPN8</i>         | 0.069                                 |
| <i>SLC39A12</i>      | 0.069                                 |
| <i>TSKS</i>          | 0.069                                 |
| <i>SEMA3B</i>        | 0.069                                 |
| <i>CXCL1</i>         | 0.069                                 |
| <i>MYZAP</i>         | 0.070                                 |
| <i>RP11-336K24.5</i> | 0.070                                 |
| <i>RP5-826L7.1</i>   | 0.070                                 |
| <i>FGFBP1</i>        | 0.070                                 |
| <i>CTD-2078B5.2</i>  | 0.070                                 |
| <i>PTAFR</i>         | 0.070                                 |
| <i>SLC16A5</i>       | 0.070                                 |
| <i>ATP1A2</i>        | 0.070                                 |
| <i>FCN1</i>          | 0.070                                 |
| <i>C11orf97</i>      | 0.070                                 |
| <i>ACP5</i>          | 0.071                                 |
| <i>C1QTNF7</i>       | 0.071                                 |

| <b>Gene Name</b>      | <b>Fold change relative to normal</b> |
|-----------------------|---------------------------------------|
| <i>FENRRR</i>         | 0.071                                 |
| <i>SPOCK2</i>         | 0.071                                 |
| <i>AC013275.2</i>     | 0.071                                 |
| <i>RP11-789C1.2</i>   | 0.071                                 |
| <i>FGFR2</i>          | 0.071                                 |
| <i>TLR8</i>           | 0.071                                 |
| <i>C19orf33</i>       | 0.071                                 |
| <i>APOC1</i>          | 0.071                                 |
| <i>ZBTB16</i>         | 0.071                                 |
| <i>GCSAML</i>         | 0.071                                 |
| <i>MS4A7</i>          | 0.071                                 |
| <i>ABCC13</i>         | 0.071                                 |
| <i>CD97</i>           | 0.071                                 |
| <i>SLCO2B1</i>        | 0.071                                 |
| <i>PAPSS2</i>         | 0.071                                 |
| <i>CYP4F32P</i>       | 0.072                                 |
| <i>CYP17A1</i>        | 0.072                                 |
| <i>TRPV2</i>          | 0.072                                 |
| <i>PTH1R</i>          | 0.072                                 |
| <i>ASPA</i>           | 0.072                                 |
| <i>HSPB6</i>          | 0.072                                 |
| <i>CHRD1</i>          | 0.072                                 |
| <i>MAP3K8</i>         | 0.072                                 |
| <i>C15orf59</i>       | 0.072                                 |
| <i>PRELID2P1</i>      | 0.072                                 |
| <i>RP11-1008C21.2</i> | 0.073                                 |
| <i>LDHD</i>           | 0.073                                 |
| <i>NEDD9</i>          | 0.073                                 |
| <i>DPP4</i>           | 0.073                                 |
| <i>SERPINA9</i>       | 0.073                                 |
| <i>BCL2A1</i>         | 0.073                                 |
| <i>ID1</i>            | 0.074                                 |
| <i>LIMS2</i>          | 0.074                                 |
| <i>CTD-3247F14.2</i>  | 0.074                                 |
| <i>GCNT4</i>          | 0.074                                 |
| <i>LINC00211</i>      | 0.074                                 |
| <i>SOD3</i>           | 0.074                                 |
| <i>APOBR</i>          | 0.074                                 |
| <i>RP11-1149M10.2</i> | 0.074                                 |
| <i>CYBB</i>           | 0.074                                 |
| <i>FCGR3A</i>         | 0.074                                 |
| <i>HIGD1B</i>         | 0.074                                 |
| <i>CTD-2530N21.5</i>  | 0.074                                 |
| <i>ADCY8</i>          | 0.074                                 |
| <i>RP11-395E19.6</i>  | 0.074                                 |
| <i>DKK1</i>           | 0.074                                 |
| <i>RP11-335L23.5</i>  | 0.074                                 |

| <b>Gene Name</b>     | <b>Fold change relative to normal</b> |
|----------------------|---------------------------------------|
| <i>C5AR1</i>         | 0.074                                 |
| <i>TYROBP</i>        | 0.075                                 |
| <i>RP11-365O16.3</i> | 0.075                                 |
| <i>MIR27A</i>        | 0.075                                 |
| <i>OSTN</i>          | 0.075                                 |
| <i>IL34</i>          | 0.075                                 |
| <i>SOSTDC1</i>       | 0.075                                 |
| <i>ASZ1</i>          | 0.075                                 |
| <i>DCN</i>           | 0.075                                 |
| <i>TEKT4</i>         | 0.075                                 |
| <i>HSPB8</i>         | 0.076                                 |
| <i>C10orf115</i>     | 0.076                                 |
| <i>PI3</i>           | 0.076                                 |
| <i>RP11-272L13.4</i> | 0.076                                 |
| <i>RP11-44D19.1</i>  | 0.076                                 |
| <i>ABCA3</i>         | 0.076                                 |
| <i>ASPG</i>          | 0.076                                 |
| <i>CH17-360D5.1</i>  | 0.077                                 |
| <i>CTD-3032H12.1</i> | 0.077                                 |
| <i>VIPR1</i>         | 0.077                                 |
| <i>LINC01166</i>     | 0.077                                 |
| <i>CST6</i>          | 0.077                                 |
| <i>ABCB1</i>         | 0.077                                 |
| <i>PSCA</i>          | 0.077                                 |
| <i>COL6A5</i>        | 0.077                                 |
| <i>HLF</i>           | 0.077                                 |
| <i>AGTR1</i>         | 0.077                                 |
| <i>AC006129.1</i>    | 0.077                                 |
| <i>DNAH17-AS1</i>    | 0.078                                 |
| <i>ABI3BP</i>        | 0.078                                 |
| <i>RP11-481H12.1</i> | 0.078                                 |
| <i>S100A3</i>        | 0.078                                 |
| <i>RP11-64C12.8</i>  | 0.078                                 |
| <i>LYPD2</i>         | 0.078                                 |
| <i>LIF</i>           | 0.078                                 |
| <i>PTPN13</i>        | 0.078                                 |
| <i>LDB2</i>          | 0.078                                 |
| <i>SIRPD</i>         | 0.078                                 |
| <i>SIGLEC6</i>       | 0.078                                 |
| <i>RP11-616M22.5</i> | 0.078                                 |
| <i>MLPH</i>          | 0.078                                 |
| <i>LRG1</i>          | 0.079                                 |
| <i>ZNF365</i>        | 0.079                                 |
| <i>ADAMTSL3</i>      | 0.079                                 |
| <i>TREM2</i>         | 0.079                                 |
| <i>A2M</i>           | 0.079                                 |
| <i>TIMP3</i>         | 0.079                                 |

| <b>Gene Name</b>     | <b>Fold change relative to normal</b> |
|----------------------|---------------------------------------|
| <i>CPED1</i>         | 0.079                                 |
| <i>RP1-229K20.5</i>  | 0.079                                 |
| <i>MS4A14</i>        | 0.079                                 |
| <i>FBLN5</i>         | 0.079                                 |
| <i>RP11-356N1.2</i>  | 0.079                                 |
| <i>FILIP1</i>        | 0.079                                 |
| <i>AXL</i>           | 0.079                                 |
| <i>STARD13-AS</i>    | 0.079                                 |
| <i>ADAMTS1</i>       | 0.079                                 |
| <i>RP11-280O1.2</i>  | 0.079                                 |
| <i>GGTA1P</i>        | 0.079                                 |
| <i>TBX2</i>          | 0.080                                 |
| <i>RBP2</i>          | 0.080                                 |
| <i>CTD-2003C8.2</i>  | 0.080                                 |
| <i>SELPLG</i>        | 0.080                                 |
| <i>PGAM1P5</i>       | 0.080                                 |
| <i>NFE2</i>          | 0.080                                 |
| <i>S1PR4</i>         | 0.080                                 |
| <i>S100A10</i>       | 0.080                                 |
| <i>FAM46B</i>        | 0.080                                 |
| <i>VIM</i>           | 0.081                                 |
| <i>FMO5</i>          | 0.081                                 |
| <i>SLURP1</i>        | 0.081                                 |
| <i>RP11-236L14.2</i> | 0.081                                 |
| <i>RP11-16K12.1</i>  | 0.081                                 |
| <i>CLEC14A</i>       | 0.081                                 |
| <i>RP11-95I16.6</i>  | 0.081                                 |
| <i>NFAM1</i>         | 0.081                                 |
| <i>CCDC69</i>        | 0.081                                 |
| <i>SIRPB2</i>        | 0.081                                 |
| <i>MT1M</i>          | 0.081                                 |
| <i>PTPRB</i>         | 0.081                                 |
| <i>GREM2</i>         | 0.082                                 |
| <i>TBX4</i>          | 0.082                                 |
| <i>EMCN</i>          | 0.082                                 |
| <i>SRPX</i>          | 0.082                                 |
| <i>RNASE1</i>        | 0.082                                 |
| <i>PROSER2</i>       | 0.082                                 |
| <i>NCF1</i>          | 0.082                                 |
| <i>RP11-806O11.1</i> | 0.082                                 |
| <i>RBPMS</i>         | 0.082                                 |
| <i>KRT13</i>         | 0.082                                 |
| <i>C1QC</i>          | 0.082                                 |
| <i>PSAPL1</i>        | 0.083                                 |
| <i>SCN2B</i>         | 0.083                                 |
| <i>SNTN</i>          | 0.083                                 |
| <i>KLK7</i>          | 0.083                                 |

| <b>Gene Name</b>     | <b>Fold change relative to normal</b> |
|----------------------|---------------------------------------|
| <i>EHD2</i>          | 0.083                                 |
| <i>SPN</i>           | 0.083                                 |
| <i>MALRD1</i>        | 0.083                                 |
| <i>LRRC36</i>        | 0.083                                 |
| <i>KRT27</i>         | 0.084                                 |
| <i>CEBPA</i>         | 0.084                                 |
| <i>HEMGN</i>         | 0.084                                 |
| <i>AC016745.3</i>    | 0.084                                 |
| <i>PHOSPHO1</i>      | 0.084                                 |
| <i>C12orf54</i>      | 0.084                                 |
| <i>EPDR1</i>         | 0.084                                 |
| <i>LYZ</i>           | 0.084                                 |
| <i>LINC00961</i>     | 0.084                                 |
| <i>CD164L2</i>       | 0.084                                 |
| <i>EPHA2</i>         | 0.084                                 |
| <i>RP4-575N6.5</i>   | 0.084                                 |
| <i>CCDC68</i>        | 0.084                                 |
| <i>S1PR1</i>         | 0.084                                 |
| <i>MS4A4A</i>        | 0.085                                 |
| <i>AC079325.6</i>    | 0.085                                 |
| <i>RP11-243M5.1</i>  | 0.085                                 |
| <i>SLC15A3</i>       | 0.085                                 |
| <i>MITF</i>          | 0.085                                 |
| <i>SHROOM4</i>       | 0.085                                 |
| <i>LINC00163</i>     | 0.085                                 |
| <i>LRRC18</i>        | 0.085                                 |
| <i>ANGPTL1</i>       | 0.085                                 |
| <i>CTD-3035K23.7</i> | 0.085                                 |
| <i>FCGR1C</i>        | 0.085                                 |
| <i>WDR38</i>         | 0.085                                 |
| <i>ALOX5</i>         | 0.085                                 |
| <i>EFEMP1</i>        | 0.086                                 |
| <i>TUBB1</i>         | 0.086                                 |
| <i>BTK</i>           | 0.086                                 |
| <i>DEFA4</i>         | 0.086                                 |
| <i>RP11-82L18.4</i>  | 0.086                                 |
| <i>ANKRD2</i>        | 0.086                                 |
| <i>SIGLEC7</i>       | 0.086                                 |
| <i>DUOXA1</i>        | 0.087                                 |
| <i>P2RX1</i>         | 0.087                                 |
| <i>CMTM2</i>         | 0.087                                 |
| <i>DAW1</i>          | 0.087                                 |
| <i>VNN1</i>          | 0.087                                 |
| <i>PDZD2</i>         | 0.087                                 |
| <i>VWA3A</i>         | 0.087                                 |
| <i>CD300LF</i>       | 0.087                                 |
| <i>AC060834.2</i>    | 0.087                                 |



| <b>Gene Name</b>     | <b>Fold change relative to normal</b> |
|----------------------|---------------------------------------|
| <i>SPARCL1</i>       | 0.087                                 |
| <i>ODF3L1</i>        | 0.087                                 |
| <i>CES1P1</i>        | 0.087                                 |
| <i>SH3GL3</i>        | 0.087                                 |
| <i>ZC3H12A</i>       | 0.087                                 |
| <i>C15orf52</i>      | 0.087                                 |
| <i>EGFL7</i>         | 0.088                                 |
| <i>ARG1</i>          | 0.088                                 |
| <i>PILRA</i>         | 0.088                                 |
| <i>FAM162B</i>       | 0.088                                 |
| <i>RN7SKP18</i>      | 0.088                                 |
| <i>PDPN</i>          | 0.088                                 |
| <i>NOSTRIN</i>       | 0.088                                 |
| <i>PDE4C</i>         | 0.088                                 |
| <i>UNC13D</i>        | 0.088                                 |
| <i>P2RY12</i>        | 0.088                                 |
| <i>JAM2</i>          | 0.088                                 |
| <i>WFDC1</i>         | 0.088                                 |
| <i>COL4A3</i>        | 0.089                                 |
| <i>CFI</i>           | 0.089                                 |
| <i>EVI2B</i>         | 0.089                                 |
| <i>WTIP</i>          | 0.089                                 |
| <i>RP11-276H7.3</i>  | 0.089                                 |
| <i>FLVCR2</i>        | 0.089                                 |
| <i>RAPGEF3</i>       | 0.089                                 |
| <i>CTSG</i>          | 0.089                                 |
| <i>SPTLC3</i>        | 0.089                                 |
| <i>C7</i>            | 0.089                                 |
| <i>CLEC1A</i>        | 0.089                                 |
| <i>NNMT</i>          | 0.090                                 |
| <i>MMP28</i>         | 0.090                                 |
| <i>MAOA</i>          | 0.090                                 |
| <i>SYT8</i>          | 0.090                                 |
| <i>ACVRL1</i>        | 0.090                                 |
| <i>RP11-622C24.2</i> | 0.090                                 |
| <i>CRISP2</i>        | 0.090                                 |
| <i>TM4SF4</i>        | 0.090                                 |
| <i>LINC00113</i>     | 0.090                                 |
| <i>CD44</i>          | 0.090                                 |
| <i>SIGLEC9</i>       | 0.090                                 |
| <i>AC104654.2</i>    | 0.090                                 |
| <i>IL1RN</i>         | 0.090                                 |
| <i>CD1C</i>          | 0.090                                 |
| <i>RP11-64B16.2</i>  | 0.090                                 |
| <i>SPATS1</i>        | 0.090                                 |
| <i>MAMDC2</i>        | 0.090                                 |
| <i>RASGRP2</i>       | 0.090                                 |

| <b>Gene Name</b>     | <b>Fold change relative to normal</b> |
|----------------------|---------------------------------------|
| <i>TMEM204</i>       | 0.090                                 |
| <i>AC017060.1</i>    | 0.090                                 |
| <i>AOC4P</i>         | 0.091                                 |
| <i>AC105053.3</i>    | 0.091                                 |
| <i>SLC4A4</i>        | 0.091                                 |
| <i>PDZK1IP1</i>      | 0.091                                 |
| <i>LINC00689</i>     | 0.091                                 |
| <i>RP3-425P12.2</i>  | 0.091                                 |
| <i>NPR3</i>          | 0.091                                 |
| <i>WISP2</i>         | 0.091                                 |
| <i>CYP27A1</i>       | 0.091                                 |
| <i>CLEC7A</i>        | 0.091                                 |
| <i>LINC01160</i>     | 0.091                                 |
| <i>FOXF1</i>         | 0.091                                 |
| <i>SOCS2</i>         | 0.091                                 |
| <i>EVPLL</i>         | 0.091                                 |
| <i>RP11-403A21.1</i> | 0.092                                 |
| <i>STAC</i>          | 0.092                                 |
| <i>VNN3</i>          | 0.092                                 |
| <i>IL33</i>          | 0.092                                 |
| <i>BMP4</i>          | 0.092                                 |
| <i>PCAT19</i>        | 0.092                                 |
| <i>IL1R1</i>         | 0.092                                 |
| <i>HSPA12B</i>       | 0.092                                 |
| <i>JUNB</i>          | 0.092                                 |
| <i>RBMS3</i>         | 0.092                                 |
| <i>SPRR2C</i>        | 0.092                                 |
| <i>DTX4</i>          | 0.092                                 |
| <i>CD55</i>          | 0.092                                 |
| <i>FSTL3</i>         | 0.093                                 |
| <i>CLEC4E</i>        | 0.093                                 |
| <i>ITGB6</i>         | 0.093                                 |
| <i>RP11-144A16.8</i> | 0.093                                 |
| <i>CD1E</i>          | 0.093                                 |
| <i>LRRC52</i>        | 0.093                                 |
| <i>C10orf128</i>     | 0.093                                 |
| <i>CYP4F29P</i>      | 0.093                                 |
| <i>CYP2A6</i>        | 0.093                                 |
| <i>ITGB2</i>         | 0.093                                 |
| <i>SOWAHD</i>        | 0.093                                 |
| <i>KLK5</i>          | 0.093                                 |
| <i>MFSD7</i>         | 0.093                                 |
| <i>TNS1</i>          | 0.094                                 |
| <i>CASP12</i>        | 0.094                                 |
| <i>ATP2C2</i>        | 0.094                                 |
| <i>DAB2</i>          | 0.094                                 |
| <i>SLC10A2</i>       | 0.094                                 |

| <b>Gene Name</b>     | <b>Fold change relative to normal</b> |
|----------------------|---------------------------------------|
| <i>CYR61</i>         | 0.094                                 |
| <i>GPR65</i>         | 0.094                                 |
| <i>BST1</i>          | 0.094                                 |
| <i>PECAM1</i>        | 0.094                                 |
| <i>C3</i>            | 0.094                                 |
| <i>LINC00504</i>     | 0.094                                 |
| <i>AHCYL2</i>        | 0.094                                 |
| <i>RP11-114G11.5</i> | 0.094                                 |
| <i>RP11-213O5.4</i>  | 0.094                                 |
| <i>GPR133</i>        | 0.094                                 |
| <i>ROBO4</i>         | 0.094                                 |
| <i>RP11-312J18.6</i> | 0.094                                 |
| <i>ABCG2</i>         | 0.094                                 |
| <i>CREB3L1</i>       | 0.095                                 |
| <i>CATIP</i>         | 0.095                                 |
| <i>C3orf55</i>       | 0.095                                 |
| <i>TNFSF12</i>       | 0.095                                 |
| <i>MGC32805</i>      | 0.095                                 |
| <i>CTB-138E5.1</i>   | 0.095                                 |
| <i>LCNL1</i>         | 0.095                                 |
| <i>PTRF</i>          | 0.095                                 |
| <i>KLK8</i>          | 0.095                                 |
| <i>FABP3</i>         | 0.095                                 |
| <i>RASSF9</i>        | 0.095                                 |
| <i>REM1</i>          | 0.096                                 |
| <i>F3</i>            | 0.096                                 |
| <i>NCF1C</i>         | 0.096                                 |
| <i>DUOX1</i>         | 0.096                                 |
| <i>TREML1</i>        | 0.096                                 |
| <i>RP11-470L19.2</i> | 0.096                                 |
| <i>CGNL1</i>         | 0.096                                 |
| <i>RP3-369A17.4</i>  | 0.096                                 |
| <i>RP11-320N7.2</i>  | 0.096                                 |
| <i>EGF</i>           | 0.097                                 |
| <i>BNIPL</i>         | 0.097                                 |
| <i>TBX5-AS1</i>      | 0.097                                 |
| <i>FCGR2A</i>        | 0.097                                 |
| <i>BCAS1</i>         | 0.097                                 |
| <i>IRX3</i>          | 0.097                                 |
| <i>MIR221</i>        | 0.097                                 |
| <i>AVPI1</i>         | 0.097                                 |
| <i>PTGS2</i>         | 0.097                                 |
| <i>LINC01081</i>     | 0.097                                 |
| <i>MGAM</i>          | 0.097                                 |
| <i>CDH16</i>         | 0.097                                 |
| <i>CLEC4D</i>        | 0.097                                 |
| <i>FXVD1</i>         | 0.098                                 |

| <b>Gene Name</b>     | <b>Fold change relative to normal</b> |
|----------------------|---------------------------------------|
| <i>CTSW</i>          | 0.098                                 |
| <i>FGFR3</i>         | 0.098                                 |
| <i>TFPI</i>          | 0.098                                 |
| <i>TIE1</i>          | 0.098                                 |
| <i>CHP2</i>          | 0.098                                 |
| <i>LAMA3</i>         | 0.098                                 |
| <i>SLC47A1</i>       | 0.098                                 |
| <i>LMOD3</i>         | 0.098                                 |
| <i>IL7R</i>          | 0.099                                 |
| <i>B3GNT7</i>        | 0.099                                 |
| <i>GNG11</i>         | 0.099                                 |
| <i>RP11-625L16.4</i> | 0.099                                 |
| <i>NPY4R</i>         | 0.099                                 |
| <i>SYT15</i>         | 0.099                                 |
| <i>FAM110D</i>       | 0.099                                 |
| <i>CR1</i>           | 0.099                                 |
| <i>RP11-212I21.2</i> | 0.099                                 |
| <i>PI16</i>          | 0.099                                 |
| <i>SCIMP</i>         | 0.099                                 |
| <i>RP11-134G8.8</i>  | 0.099                                 |
| <i>KPNA7</i>         | 0.099                                 |
| <i>C20orf85</i>      | 0.099                                 |
| <i>PRODH</i>         | 0.099                                 |
| <i>UPK2</i>          | 0.099                                 |
| <i>LATS2</i>         | 0.099                                 |
| <i>VENTX</i>         | 0.099                                 |
| <i>RP11-327J17.9</i> | 0.099                                 |
| <i>SLC24A4</i>       | 0.099                                 |
| <i>LIPN</i>          | 0.099                                 |
| <i>TEPP</i>          | 0.099                                 |
| <i>CCL2</i>          | 0.099                                 |
| <i>RP11-95I16.2</i>  | 0.099                                 |
| <i>MYL3</i>          | 0.099                                 |
| <i>CEBPE</i>         | 0.100                                 |
| <i>CAPNS2</i>        | 0.100                                 |
| <i>GGT2</i>          | 0.100                                 |
| <i>CELA3B</i>        | 0.100                                 |
| <i>RP11-800A3.4</i>  | 0.100                                 |
| <i>RP11-838N2.4</i>  | 0.100                                 |
| <i>COX7A1</i>        | 0.100                                 |
| <i>TGM4</i>          | 0.100                                 |
| <i>CISH</i>          | 0.100                                 |
| <i>CTSS</i>          | 0.101                                 |
| <i>XXyac-YM21GA2</i> | 0.101                                 |
| <i>RP5-899E9.1</i>   | 0.101                                 |
| <i>RNF128</i>        | 0.101                                 |
| <i>OIT3</i>          | 0.101                                 |

| <b>Gene Name</b>     | <b>Fold change relative to normal</b> |
|----------------------|---------------------------------------|
| <i>GPR87</i>         | 0.101                                 |
| <i>AC003075.4</i>    | 0.101                                 |
| <i>RP1</i>           | 0.101                                 |
| <i>LEPREL1-AS1</i>   | 0.101                                 |
| <i>ARRB1</i>         | 0.101                                 |
| <i>RAMP3</i>         | 0.101                                 |
| <i>RP11-676J12.7</i> | 0.101                                 |
| <i>RP11-403B2.7</i>  | 0.101                                 |
| <i>Z84812.4</i>      | 0.101                                 |
| <i>CYGB</i>          | 0.101                                 |
| <i>IL13RA2</i>       | 0.101                                 |
| <i>RP11-320G24.1</i> | 0.102                                 |
| <i>ARHGAP6</i>       | 0.102                                 |
| <i>AC009238.8</i>    | 0.102                                 |
| <i>ENPP3</i>         | 0.102                                 |
| <i>RP11-44B19.1</i>  | 0.102                                 |
| <i>SOX17</i>         | 0.102                                 |
| <i>MYL9</i>          | 0.102                                 |
| <i>HSPA8P20</i>      | 0.102                                 |
| <i>SPINK7</i>        | 0.102                                 |
| <i>NAPSB</i>         | 0.102                                 |
| <i>TNFAIP8L2</i>     | 0.102                                 |
| <i>SLC51B</i>        | 0.102                                 |
| <i>ADCY7</i>         | 0.103                                 |
| <i>CA4</i>           | 0.103                                 |
| <i>ARHGAP40</i>      | 0.103                                 |
| <i>ARHGEF15</i>      | 0.103                                 |
| <i>NR3C2</i>         | 0.103                                 |
| <i>TRPC6</i>         | 0.103                                 |
| <i>GNG7</i>          | 0.103                                 |
| <i>RP11-403A3.2</i>  | 0.103                                 |
| <i>RP11-512N21.3</i> | 0.103                                 |
| <i>NCF1B</i>         | 0.103                                 |
| <i>ERP27</i>         | 0.103                                 |
| <i>RRAS</i>          | 0.103                                 |
| <i>AP000438.2</i>    | 0.103                                 |
| <i>RP11-63P12.6</i>  | 0.103                                 |
| <i>CD93</i>          | 0.103                                 |
| <i>GAPT</i>          | 0.103                                 |
| <i>LINC01169</i>     | 0.103                                 |
| <i>HKDC1</i>         | 0.104                                 |
| <i>SLCO2A1</i>       | 0.104                                 |
| <i>HHLA2</i>         | 0.104                                 |
| <i>AP001189.4</i>    | 0.104                                 |
| <i>EVA1A</i>         | 0.104                                 |
| <i>MGAT3</i>         | 0.104                                 |
| <i>LINC01165</i>     | 0.104                                 |

| <b>Gene Name</b>     | <b>Fold change relative to normal</b> |
|----------------------|---------------------------------------|
| <i>GHR</i>           | 0.105                                 |
| <i>TAL1</i>          | 0.105                                 |
| <i>RN7SKP51</i>      | 0.105                                 |
| <i>AC108868.5</i>    | 0.105                                 |
| <i>EMP1</i>          | 0.105                                 |
| <i>LINC01094</i>     | 0.105                                 |
| <i>WDFY4</i>         | 0.105                                 |
| <i>ESAM</i>          | 0.105                                 |
| <i>CXCL17</i>        | 0.105                                 |
| <i>RP13-580F15.2</i> | 0.105                                 |
| <i>SGK1</i>          | 0.105                                 |
| <i>GMFG</i>          | 0.105                                 |
| <i>TMEM150A</i>      | 0.105                                 |
| <i>CAT</i>           | 0.105                                 |
| <i>RP11-473M20.9</i> | 0.105                                 |
| <i>GRTP1-AS1</i>     | 0.105                                 |
| <i>MYCT1</i>         | 0.105                                 |
| <i>LINC00443</i>     | 0.106                                 |
| <i>PAQR5</i>         | 0.106                                 |
| <i>MYO1F</i>         | 0.106                                 |
| <i>SEMA3G</i>        | 0.106                                 |
| <i>DKK2</i>          | 0.106                                 |
| <i>PPP1R42</i>       | 0.106                                 |
| <i>C10orf54</i>      | 0.106                                 |
| <i>LCN6</i>          | 0.106                                 |
| <i>GPC5</i>          | 0.106                                 |
| <i>LLNLR-470E3.1</i> | 0.106                                 |
| <i>CTD-2562J17.7</i> | 0.106                                 |
| <i>GIMAP8</i>        | 0.106                                 |
| <i>RMDN2</i>         | 0.106                                 |
| <i>TDRD9</i>         | 0.106                                 |
| <i>VIM-AS1</i>       | 0.107                                 |
| <i>FAT4</i>          | 0.107                                 |
| <i>S100P</i>         | 0.107                                 |
| <i>THEMIS2</i>       | 0.107                                 |
| <i>LRRC32</i>        | 0.107                                 |
| <i>KRT73</i>         | 0.107                                 |
| <i>KMO</i>           | 0.107                                 |
| <i>PTGER2</i>        | 0.107                                 |
| <i>FCER1G</i>        | 0.107                                 |
| <i>PLXDC2</i>        | 0.107                                 |
| <i>BLVRB</i>         | 0.107                                 |
| <i>GCSAML-AS1</i>    | 0.107                                 |
| <i>LRRC25</i>        | 0.107                                 |
| <i>ITGAX</i>         | 0.107                                 |
| <i>SLC37A2</i>       | 0.108                                 |
| <i>LIPA</i>          | 0.108                                 |

| <b>Gene Name</b>      | <b>Fold change relative to normal</b> |
|-----------------------|---------------------------------------|
| <i>NTRK3</i>          | 0.108                                 |
| <i>TNFSF13</i>        | 0.108                                 |
| <i>MPP7</i>           | 0.108                                 |
| <i>KLF15</i>          | 0.108                                 |
| <i>LDLR</i>           | 0.108                                 |
| <i>PHLDA3</i>         | 0.108                                 |
| <i>RIN3</i>           | 0.108                                 |
| <i>METRN</i>          | 0.108                                 |
| <i>LPAL2</i>          | 0.108                                 |
| <i>AC004988.1</i>     | 0.108                                 |
| <i>APOE</i>           | 0.108                                 |
| <i>LRP1</i>           | 0.109                                 |
| <i>SHC3</i>           | 0.109                                 |
| <i>SERPING1</i>       | 0.109                                 |
| <i>CAV3</i>           | 0.109                                 |
| <i>RP11-1223D19.1</i> | 0.109                                 |
| <i>RPL23AP35</i>      | 0.109                                 |
| <i>RP11-56A10.1</i>   | 0.109                                 |
| <i>ANG</i>            | 0.109                                 |
| <i>CTSD</i>           | 0.109                                 |
| <i>PTPN21</i>         | 0.109                                 |
| <i>AFF3</i>           | 0.109                                 |
| <i>SGCA</i>           | 0.109                                 |
| <i>CST5</i>           | 0.109                                 |
| <i>HLA-DMA</i>        | 0.109                                 |
| <i>RP11-408O19.5</i>  | 0.109                                 |
| <i>PRSS57</i>         | 0.109                                 |
| <i>RGN</i>            | 0.110                                 |
| <i>CLDN1</i>          | 0.110                                 |
| <i>TBC1D2</i>         | 0.110                                 |
| <i>RP11-283G6.4</i>   | 0.110                                 |
| <i>ACE2</i>           | 0.110                                 |
| <i>PCDH20</i>         | 0.110                                 |
| <i>C10orf107</i>      | 0.110                                 |
| <i>PIH1D3</i>         | 0.110                                 |
| <i>CYMP</i>           | 0.110                                 |
| <i>AP002954.4</i>     | 0.110                                 |
| <i>LINC01267</i>      | 0.110                                 |
| <i>RP11-589N15.2</i>  | 0.110                                 |
| <i>KCNA10</i>         | 0.110                                 |
| <i>TGM2</i>           | 0.110                                 |
| <i>SQRDL</i>          | 0.111                                 |
| <i>KLB</i>            | 0.111                                 |
| <i>RP11-548P2.2</i>   | 0.111                                 |
| <i>P2RY13</i>         | 0.111                                 |
| <i>PPP1R14A</i>       | 0.111                                 |
| <i>G0S2</i>           | 0.111                                 |

| <b>Gene Name</b>     | <b>Fold change relative to normal</b> |
|----------------------|---------------------------------------|
| <i>AC019117.2</i>    | 0.111                                 |
| <i>ELF5</i>          | 0.111                                 |
| <i>AC123886.2</i>    | 0.112                                 |
| <i>CD69</i>          | 0.112                                 |
| <i>FCGR1A</i>        | 0.112                                 |
| <i>AADAC</i>         | 0.112                                 |
| <i>SNTB1</i>         | 0.112                                 |
| <i>HNMT</i>          | 0.112                                 |
| <i>RP11-203P23.2</i> | 0.112                                 |
| <i>RP11-121A8.1</i>  | 0.112                                 |
| <i>GLRX</i>          | 0.112                                 |
| <i>SMG8</i>          | 0.112                                 |
| <i>GATA5</i>         | 0.112                                 |
| <i>CYP4A11</i>       | 0.112                                 |
| <i>CEBPD</i>         | 0.112                                 |
| <i>RP11-20J15.3</i>  | 0.112                                 |
| <i>CTD-2626G11.2</i> | 0.113                                 |
| <i>TLR5</i>          | 0.113                                 |
| <i>SEMA3C</i>        | 0.113                                 |
| <i>AC116035.1</i>    | 0.113                                 |
| <i>NUPR1</i>         | 0.113                                 |
| <i>BX842568.1</i>    | 0.113                                 |
| <i>KLF8</i>          | 0.113                                 |
| <i>CD74</i>          | 0.113                                 |
| <i>CEACAM6</i>       | 0.113                                 |
| <i>CTD-2515H24.2</i> | 0.113                                 |
| <i>TSC22D3</i>       | 0.113                                 |
| <i>CTD-2531D15.4</i> | 0.113                                 |
| <i>NCF4</i>          | 0.113                                 |
| <i>PALMD</i>         | 0.114                                 |
| <i>LAPTM5</i>        | 0.114                                 |
| <i>EMR4P</i>         | 0.114                                 |
| <i>GPR97</i>         | 0.114                                 |
| <i>RP11-567J20.3</i> | 0.114                                 |
| <i>TGFB1</i>         | 0.114                                 |
| <i>RP11-352D13.5</i> | 0.114                                 |
| <i>CTA-85E5.10</i>   | 0.114                                 |
| <i>SH2D3C</i>        | 0.114                                 |
| <i>AHR</i>           | 0.114                                 |
| <i>FCGR1B</i>        | 0.114                                 |
| <i>MYBPC3</i>        | 0.114                                 |
| <i>CASS4</i>         | 0.114                                 |
| <i>SIGLEC18P</i>     | 0.115                                 |
| <i>IL4R</i>          | 0.115                                 |
| <i>RP11-472G21.2</i> | 0.115                                 |
| <i>IL1B</i>          | 0.115                                 |
| <i>WARSP1</i>        | 0.115                                 |



| <b>Gene Name</b> | <b>Fold change relative to normal</b> |
|------------------|---------------------------------------|
| AJUBA            | 0.115                                 |
| P2RY2            | 0.115                                 |
| KLF9             | 0.115                                 |
| AC006273.4       | 0.115                                 |
| RN7SL475P        | 0.115                                 |
| PMP22            | 0.115                                 |
| APOBEC3A         | 0.115                                 |
| ATP13A4-AS1      | 0.115                                 |
| HRCT1            | 0.115                                 |
| IL18R1           | 0.115                                 |
| S100A14          | 0.115                                 |
| Metazoa_SRP      | 0.116                                 |
| IL18             | 0.116                                 |
| SLC16A11         | 0.116                                 |
| RP4-666F24.3     | 0.116                                 |
| GNGT2            | 0.116                                 |
| AC109642.1       | 0.116                                 |
| RTKN2            | 0.116                                 |
| FAM124B          | 0.116                                 |
| RP11-440I14.3    | 0.116                                 |
| MYH2             | 0.116                                 |
| SIGLEC16         | 0.116                                 |
| RP11-1C1.7       | 0.116                                 |
| RP1-151F17.2     | 0.116                                 |
| HCK              | 0.116                                 |
| CX3CR1           | 0.116                                 |
| CX3CL1           | 0.116                                 |
| CR2              | 0.116                                 |
| LINC00890        | 0.116                                 |
| RNU6ATAC18P      | 0.117                                 |
| DENND3           | 0.117                                 |
| FGD2             | 0.117                                 |
| RP11-475O23.2    | 0.117                                 |
| LGALS3           | 0.117                                 |
| TRAV5            | 0.117                                 |
| AC007381.3       | 0.117                                 |
| ACOXL            | 0.118                                 |
| RBMY1KP          | 0.118                                 |
| DHRS9            | 0.118                                 |
| FAM166B          | 0.118                                 |
| GPR123           | 0.118                                 |
| RP11-626H12.1    | 0.118                                 |
| GABRE            | 0.118                                 |
| CARD16           | 0.118                                 |
| AOX1             | 0.118                                 |
| ST6GALNAC1       | 0.118                                 |
| MUC1             | 0.119                                 |

| <b>Gene Name</b>      | <b>Fold change relative to normal</b> |
|-----------------------|---------------------------------------|
| <i>CTSC</i>           | 0.119                                 |
| <i>SIRPA</i>          | 0.119                                 |
| <i>TMEM119</i>        | 0.119                                 |
| <i>CD37</i>           | 0.119                                 |
| <i>NR4A1</i>          | 0.119                                 |
| <i>C1orf186</i>       | 0.119                                 |
| <i>CD302</i>          | 0.119                                 |
| <i>KIAA1462</i>       | 0.120                                 |
| <i>CLIP4</i>          | 0.120                                 |
| <i>RP11-155N3.4</i>   | 0.120                                 |
| <i>EMP2</i>           | 0.120                                 |
| <i>AQP10</i>          | 0.120                                 |
| <i>CORIN</i>          | 0.120                                 |
| <i>KLRB1</i>          | 0.120                                 |
| <i>ADPRH</i>          | 0.120                                 |
| <i>OR5BA1P</i>        | 0.120                                 |
| <i>ZNF727P</i>        | 0.120                                 |
| <i>AC092652.1</i>     | 0.120                                 |
| <i>PRELP</i>          | 0.121                                 |
| <i>TRGJP2</i>         | 0.121                                 |
| <i>PER1</i>           | 0.121                                 |
| <i>RP11-93B14.10</i>  | 0.121                                 |
| <i>AC083949.1</i>     | 0.121                                 |
| <i>RP11-820L6.1</i>   | 0.121                                 |
| <i>AC016735.2</i>     | 0.121                                 |
| <i>ACSL5</i>          | 0.121                                 |
| <i>SLC25A47P1</i>     | 0.121                                 |
| <i>ABCC6P2</i>        | 0.121                                 |
| <i>RP11-120M18.5</i>  | 0.121                                 |
| <i>HMOX1</i>          | 0.121                                 |
| <i>RP11-720N19.1</i>  | 0.121                                 |
| <i>DLEC1</i>          | 0.121                                 |
| <i>STOM</i>           | 0.121                                 |
| <i>DAPK2</i>          | 0.121                                 |
| <i>SLC6A12</i>        | 0.121                                 |
| <i>CTC-436P18.3</i>   | 0.121                                 |
| <i>RP11-350G8.5</i>   | 0.121                                 |
| <i>ORM2</i>           | 0.121                                 |
| <i>ASAH1</i>          | 0.121                                 |
| <i>C3AR1</i>          | 0.121                                 |
| <i>TBXAS1</i>         | 0.121                                 |
| <i>ENG</i>            | 0.122                                 |
| <i>RP11-277P12.10</i> | 0.122                                 |
| <i>C5AR2</i>          | 0.122                                 |
| <i>ACKR4</i>          | 0.122                                 |
| <i>RP11-732A21.3</i>  | 0.122                                 |
| <i>PEG3</i>           | 0.122                                 |

| <b>Gene Name</b>     | <b>Fold change relative to normal</b> |
|----------------------|---------------------------------------|
| <i>SIRPAP1</i>       | 0.122                                 |
| <i>LAMB3</i>         | 0.122                                 |
| <i>RP11-673E1.3</i>  | 0.122                                 |
| <i>IL1R2</i>         | 0.122                                 |
| <i>AC011516.2</i>    | 0.123                                 |
| <i>TNIP3</i>         | 0.123                                 |
| <i>ACOX2</i>         | 0.123                                 |
| <i>RP11-800A3.7</i>  | 0.123                                 |
| <i>RP11-44F14.1</i>  | 0.123                                 |
| <i>LTA4H</i>         | 0.123                                 |
| <i>RP11-641D5.2</i>  | 0.123                                 |
| <i>PDE6G</i>         | 0.123                                 |
| <i>KIF1C</i>         | 0.123                                 |
| <i>TLR4</i>          | 0.123                                 |
| <i>C6orf229</i>      | 0.123                                 |
| <i>COL13A1</i>       | 0.123                                 |
| <i>CNN2</i>          | 0.123                                 |
| <i>OSMR</i>          | 0.123                                 |
| <i>PKDCC</i>         | 0.123                                 |
| <i>LAIR1</i>         | 0.124                                 |
| <i>TCTEX1D4</i>      | 0.124                                 |
| <i>RP11-671P2.1</i>  | 0.124                                 |
| <i>SIDT2</i>         | 0.124                                 |
| <i>DNASE2B</i>       | 0.124                                 |
| <i>ABCC3</i>         | 0.124                                 |
| <i>AC018647.3</i>    | 0.124                                 |
| <i>TNXB</i>          | 0.124                                 |
| <i>GGT1</i>          | 0.124                                 |
| <i>MLC1</i>          | 0.124                                 |
| <i>ALS2CL</i>        | 0.124                                 |
| <i>CALCRL</i>        | 0.125                                 |
| <i>STARD8</i>        | 0.125                                 |
| <i>CD22</i>          | 0.125                                 |
| <i>BHLHE40</i>       | 0.125                                 |
| <i>BIN2</i>          | 0.125                                 |
| <i>GLP2R</i>         | 0.125                                 |
| <i>RP4-530I15.10</i> | 0.125                                 |
| <i>PRKCQ</i>         | 0.125                                 |
| <i>PCP4L1</i>        | 0.125                                 |
| <i>APBB1IP</i>       | 0.125                                 |
| <i>MSRB3</i>         | 0.125                                 |
| <i>TMBIM1</i>        | 0.125                                 |
| <i>RP11-467L13.5</i> | 0.125                                 |
| <i>NPC2</i>          | 0.125                                 |
| <i>RP11-1100L3.8</i> | 0.125                                 |
| <i>LINC01010</i>     | 0.125                                 |
| <i>AC073130.1</i>    | 0.125                                 |

| <b>Gene Name</b>     | <b>Fold change relative to normal</b> |
|----------------------|---------------------------------------|
| <i>RP11-164J13.1</i> | 0.126                                 |
| <i>GIMAP1</i>        | 0.126                                 |
| <i>AKAP13</i>        | 0.126                                 |
| <i>ATP13A5</i>       | 0.126                                 |
| <i>RP11-446E9.2</i>  | 0.126                                 |
| <i>HGF</i>           | 0.126                                 |
| <i>APOC1P1</i>       | 0.126                                 |
| <i>RP11-588K22.2</i> | 0.126                                 |
| <i>SNORA48</i>       | 0.126                                 |
| <i>AP001434.2</i>    | 0.126                                 |
| <i>RP11-370I10.2</i> | 0.126                                 |
| <i>GP1B1</i>         | 0.126                                 |
| <i>RP11-259K15.2</i> | 0.126                                 |
| <i>KCNJ8</i>         | 0.127                                 |
| <i>TFEC</i>          | 0.127                                 |
| <i>RP1-28O10.1</i>   | 0.127                                 |
| <i>RPSAP47</i>       | 0.127                                 |
| <i>RP11-373D23.3</i> | 0.127                                 |
| <i>RP11-736K20.5</i> | 0.127                                 |
| <i>LMTK3</i>         | 0.127                                 |
| <i>LPL</i>           | 0.127                                 |
| <i>TNFRSF10B</i>     | 0.127                                 |
| <i>CDA</i>           | 0.127                                 |
| <i>SMAD6</i>         | 0.128                                 |
| <i>RP13-577H12.2</i> | 0.128                                 |
| <i>RP11-627G18.1</i> | 0.128                                 |
| <i>CARD6</i>         | 0.128                                 |
| <i>KLRF1</i>         | 0.128                                 |
| <i>OSGIN1</i>        | 0.128                                 |
| <i>FERMT3</i>        | 0.128                                 |
| <i>NEXN</i>          | 0.128                                 |
| <i>ARHGAP18</i>      | 0.128                                 |
| <i>IFITM2</i>        | 0.128                                 |
| <i>ALDH1A1</i>       | 0.128                                 |
| <i>FIBIN</i>         | 0.128                                 |
| <i>BMP2</i>          | 0.128                                 |
| <i>SPATC1</i>        | 0.128                                 |
| <i>CTC-441N14.2</i>  | 0.128                                 |
| <i>PDE4A</i>         | 0.128                                 |
| <i>C19orf35</i>      | 0.128                                 |
| <i>RP11-7F17.3</i>   | 0.128                                 |
| <i>MROH9</i>         | 0.129                                 |
| <i>GAS2L1</i>        | 0.129                                 |
| <i>FAM20A</i>        | 0.129                                 |
| <i>C1orf200</i>      | 0.129                                 |
| <i>TMEM125</i>       | 0.129                                 |
| <i>TRIB1</i>         | 0.129                                 |

| <b>Gene Name</b>    | <b>Fold change relative to normal</b> |
|---------------------|---------------------------------------|
| <i>RP11-823E8.3</i> | 0.129                                 |
| <i>CSF2RB</i>       | 0.129                                 |
| <i>CD53</i>         | 0.129                                 |
| <i>CAPN11</i>       | 0.129                                 |
| <i>SRGN</i>         | 0.129                                 |
| <i>SECISBP2L</i>    | 0.130                                 |
| <i>SLC2A9</i>       | 0.130                                 |
| <i>ECSCR</i>        | 0.130                                 |
| <i>OSMR-AS1</i>     | 0.130                                 |
| <i>RP11-82L18.2</i> | 0.130                                 |
| <i>TPRG1</i>        | 0.130                                 |
| <i>LIMCH1</i>       | 0.130                                 |
| <i>SLC43A2</i>      | 0.130                                 |
| <i>SASH3</i>        | 0.130                                 |
| <i>DENND2C</i>      | 0.130                                 |
| <i>LILRA5</i>       | 0.130                                 |
| <i>ADAM29</i>       | 0.130                                 |
| <i>CFP</i>          | 0.130                                 |
| <i>RP11-93B14.9</i> | 0.131                                 |
| <i>CA12</i>         | 0.131                                 |
| <i>VSIG2</i>        | 0.131                                 |
| <i>RP11-70C1.1</i>  | 0.131                                 |
| <i>ZYX</i>          | 0.131                                 |
| <i>CCRL2</i>        | 0.131                                 |
| <i>NIM1K</i>        | 0.131                                 |
| <i>IGJ</i>          | 0.131                                 |
| <i>AC007277.3</i>   | 0.131                                 |
| <i>MS4A3</i>        | 0.131                                 |
| <i>C8orf4</i>       | 0.131                                 |
| <i>CETP</i>         | 0.131                                 |
| <i>SH2D4B</i>       | 0.131                                 |
| <i>GPSM3</i>        | 0.131                                 |
| <i>CRIM1</i>        | 0.131                                 |
| <i>RP11-359M6.1</i> | 0.131                                 |
| <i>ABCA6</i>        | 0.132                                 |
| <i>GPR110</i>       | 0.132                                 |
| <i>FTL</i>          | 0.132                                 |
| <i>AC106788.1</i>   | 0.132                                 |
| <i>MRGPRF</i>       | 0.132                                 |
| <i>PRRG1</i>        | 0.132                                 |
| <i>MYH11</i>        | 0.132                                 |
| <i>EFEMP2</i>       | 0.132                                 |
| <i>LINC00892</i>    | 0.132                                 |
| <i>SULT1A1</i>      | 0.132                                 |
| <i>ACE</i>          | 0.132                                 |
| <i>KRT40</i>        | 0.132                                 |
| <i>AC092569.2</i>   | 0.132                                 |

| <b>Gene Name</b>     | <b>Fold change relative to normal</b> |
|----------------------|---------------------------------------|
| <i>SAMD4A</i>        | 0.132                                 |
| <i>GPNMB</i>         | 0.132                                 |
| <i>TLR7</i>          | 0.132                                 |
| <i>RP11-85G21.2</i>  | 0.133                                 |
| <i>CTB-43E15.2</i>   | 0.133                                 |
| <i>SLC1A7</i>        | 0.133                                 |
| <i>MIR24-2</i>       | 0.133                                 |
| <i>ITPR1</i>         | 0.133                                 |
| <i>MYO1G</i>         | 0.133                                 |
| <i>LTBP4</i>         | 0.133                                 |
| <i>USP30-AS1</i>     | 0.133                                 |
| <i>RP11-432J24.5</i> | 0.133                                 |
| <i>RP4-575N6.4</i>   | 0.133                                 |
| <i>PTGDR</i>         | 0.133                                 |
| <i>RP13-213K19.1</i> | 0.133                                 |
| <i>TPK1</i>          | 0.133                                 |
| <i>EVI2A</i>         | 0.134                                 |
| <i>KLF4</i>          | 0.134                                 |
| <i>RP11-300J18.1</i> | 0.134                                 |
| <i>MDFIC</i>         | 0.134                                 |
| <i>SH2D1B</i>        | 0.134                                 |
| <i>RNF144B</i>       | 0.134                                 |
| <i>EMP3</i>          | 0.134                                 |
| <i>RP11-202D1.3</i>  | 0.134                                 |
| <i>SLC15A2</i>       | 0.134                                 |
| <i>GSDMC</i>         | 0.135                                 |
| <i>EPPIN</i>         | 0.135                                 |
| <i>DEFB4A</i>        | 0.135                                 |
| <i>C11orf21</i>      | 0.135                                 |
| <i>CTD-2245E15.3</i> | 0.135                                 |
| <i>RP11-381N20.1</i> | 0.135                                 |
| <i>CD4</i>           | 0.135                                 |
| <i>SLA</i>           | 0.135                                 |
| <i>MMRN2</i>         | 0.135                                 |
| <i>AC144831.1</i>    | 0.135                                 |
| <i>LINC00702</i>     | 0.135                                 |
| <i>RAB31</i>         | 0.135                                 |
| <i>RENBP</i>         | 0.135                                 |
| <i>KLHL6</i>         | 0.135                                 |
| <i>OSR1</i>          | 0.136                                 |
| <i>OMG</i>           | 0.136                                 |
| <i>FAM89A</i>        | 0.136                                 |
| <i>RPL31P40</i>      | 0.136                                 |
| <i>LPXN</i>          | 0.136                                 |
| <i>SHISA3</i>        | 0.136                                 |
| <i>TENC1</i>         | 0.136                                 |
| <i>TMEM71</i>        | 0.136                                 |

| <b>Gene Name</b>     | <b>Fold change relative to normal</b> |
|----------------------|---------------------------------------|
| <i>RP11-309N17.4</i> | 0.136                                 |
| <i>ANKDD1B</i>       | 0.136                                 |
| <i>RP11-159H3.1</i>  | 0.136                                 |
| <i>SEMA3E</i>        | 0.136                                 |
| <i>ZEB2</i>          | 0.136                                 |
| <i>MPZL2</i>         | 0.136                                 |
| <i>P2RX2</i>         | 0.136                                 |
| <i>SLC16A4</i>       | 0.136                                 |
| <i>TRPC2</i>         | 0.136                                 |
| <i>RP1-120G22.11</i> | 0.137                                 |
| <i>CTD-3023J11.2</i> | 0.137                                 |
| <i>OGN</i>           | 0.137                                 |
| <i>MTUS1</i>         | 0.137                                 |
| <i>ABLIM3</i>        | 0.137                                 |
| <i>RP11-432J24.2</i> | 0.137                                 |
| <i>CEACAM3</i>       | 0.137                                 |
| <i>RP11-333A23.4</i> | 0.137                                 |
| <i>RP11-443B7.3</i>  | 0.137                                 |
| <i>FAM3D</i>         | 0.137                                 |
| <i>RP4-576H24.2</i>  | 0.137                                 |
| <i>RGS18</i>         | 0.137                                 |
| <i>ZNF300P1</i>      | 0.137                                 |
| <i>GUCY1A3</i>       | 0.137                                 |
| <i>SECTM1</i>        | 0.138                                 |
| <i>COL4A4</i>        | 0.138                                 |
| <i>RP11-459E5.1</i>  | 0.138                                 |
| <i>OLFML1</i>        | 0.138                                 |
| <i>RP1-29C18.9</i>   | 0.138                                 |
| <i>SYNPO</i>         | 0.138                                 |
| <i>LGALS4</i>        | 0.138                                 |
| <i>PARM1</i>         | 0.139                                 |
| <i>RP11-626A5.2</i>  | 0.139                                 |
| <i>MRC2</i>          | 0.139                                 |
| <i>ITPKC</i>         | 0.139                                 |
| <i>TRBV28</i>        | 0.139                                 |
| <i>SYDE1</i>         | 0.139                                 |
| <i>TRAV18</i>        | 0.139                                 |
| <i>FUOM</i>          | 0.139                                 |
| <i>ADCY4</i>         | 0.139                                 |
| <i>CITED2</i>        | 0.139                                 |
| <i>TP63</i>          | 0.139                                 |
| <i>CTRB1</i>         | 0.139                                 |
| <i>CELF2-AS2</i>     | 0.139                                 |
| <i>CCDC42B</i>       | 0.139                                 |
| <i>HVCN1</i>         | 0.139                                 |
| <i>PRKG1</i>         | 0.140                                 |
| <i>AC083900.1</i>    | 0.140                                 |

| <b>Gene Name</b>     | <b>Fold change relative to normal</b> |
|----------------------|---------------------------------------|
| <i>EDAR</i>          | 0.140                                 |
| <i>VSTM4</i>         | 0.140                                 |
| <i>GJA5</i>          | 0.140                                 |
| <i>TMEM243</i>       | 0.140                                 |
| <i>RP11-864I4.3</i>  | 0.140                                 |
| <i>PCOLCE2</i>       | 0.140                                 |
| <i>ACSL1</i>         | 0.140                                 |
| <i>AGPAT9</i>        | 0.140                                 |
| <i>AC147651.4</i>    | 0.141                                 |
| <i>KRT87P</i>        | 0.141                                 |
| <i>CTGF</i>          | 0.141                                 |
| <i>TSPO</i>          | 0.141                                 |
| <i>RP11-156K13.1</i> | 0.141                                 |
| <i>CD86</i>          | 0.141                                 |
| <i>RAB11FIP1</i>     | 0.141                                 |
| <i>ARAP2</i>         | 0.141                                 |
| <i>UBTD1</i>         | 0.141                                 |
| <i>ABCC9</i>         | 0.141                                 |
| <i>RP11-264B14.1</i> | 0.141                                 |
| <i>DHRS3</i>         | 0.142                                 |
| <i>VNN2</i>          | 0.142                                 |
| <i>ITGA8</i>         | 0.142                                 |
| <i>HNRNPA1P33</i>    | 0.142                                 |
| <i>C20orf166-AS1</i> | 0.142                                 |
| <i>SVEP1</i>         | 0.142                                 |
| <i>DNAAF1</i>        | 0.142                                 |
| <i>IFFO1</i>         | 0.142                                 |
| <i>AKR1C1</i>        | 0.142                                 |
| <i>TSPAN32</i>       | 0.142                                 |
| <i>UNC45B</i>        | 0.142                                 |
| <i>ADAMTSL4-AS1</i>  | 0.142                                 |
| <i>FRMD4B</i>        | 0.142                                 |
| <i>RP11-541N10.3</i> | 0.142                                 |
| <i>LINC00982</i>     | 0.143                                 |
| <i>FAH</i>           | 0.143                                 |
| <i>CLEC2B</i>        | 0.143                                 |
| <i>CDC42EP1</i>      | 0.143                                 |
| <i>TRIM61</i>        | 0.143                                 |
| <i>CDH5</i>          | 0.143                                 |
| <i>HS3ST2</i>        | 0.143                                 |
| <i>RP3-332B22.1</i>  | 0.143                                 |
| <i>RCVRN</i>         | 0.143                                 |
| <i>ADAMTSL5</i>      | 0.143                                 |
| <i>CA1</i>           | 0.143                                 |
| <i>SEMA4A</i>        | 0.143                                 |
| <i>OR6K3</i>         | 0.143                                 |
| <i>CAPN3</i>         | 0.143                                 |



| <b>Gene Name</b>    | <b>Fold change relative to normal</b> |
|---------------------|---------------------------------------|
| <i>PLCD3</i>        | 0.143                                 |
| <i>C5orf38</i>      | 0.144                                 |
| <i>PTPRE</i>        | 0.145                                 |
| <i>ITGAL</i>        | 0.145                                 |
| <i>ALDH3A1</i>      | 0.145                                 |
| <i>THSD1</i>        | 0.145                                 |
| <i>TCL1A</i>        | 0.145                                 |
| <i>AC008592.5</i>   | 0.145                                 |
| <i>IL20RA</i>       | 0.145                                 |
| <i>LRRC2</i>        | 0.145                                 |
| <i>FKBP5</i>        | 0.146                                 |
| <i>RAB27B</i>       | 0.146                                 |
| <i>GPRIN2</i>       | 0.146                                 |
| <i>FAM83E</i>       | 0.146                                 |
| <i>DAAM2</i>        | 0.146                                 |
| <i>CELF2</i>        | 0.146                                 |
| <i>RILPL2</i>       | 0.146                                 |
| <i>ZCCHC24</i>      | 0.146                                 |
| <i>VWF</i>          | 0.146                                 |
| <i>DNAJC5B</i>      | 0.146                                 |
| <i>SLED1</i>        | 0.147                                 |
| <i>AJ239322.1</i>   | 0.147                                 |
| <i>TNFRSF10D</i>    | 0.147                                 |
| <i>ELL2</i>         | 0.147                                 |
| <i>PLCB2</i>        | 0.147                                 |
| <i>UPB1</i>         | 0.147                                 |
| <i>KRBOX1</i>       | 0.147                                 |
| <i>ATP10A</i>       | 0.147                                 |
| <i>LRRN4CL</i>      | 0.147                                 |
| <i>CCR1</i>         | 0.147                                 |
| <i>FCGRT</i>        | 0.147                                 |
| <i>CASP10</i>       | 0.148                                 |
| <i>CSF1R</i>        | 0.148                                 |
| <i>CAPG</i>         | 0.148                                 |
| <i>GJA4</i>         | 0.148                                 |
| <i>CXCL8</i>        | 0.148                                 |
| <i>FAM81B</i>       | 0.148                                 |
| <i>NCKAP5</i>       | 0.148                                 |
| <i>ZFPM2</i>        | 0.148                                 |
| <i>RHOB</i>         | 0.148                                 |
| <i>Y_RNA</i>        | 0.148                                 |
| <i>CTD-3203P2.3</i> | 0.148                                 |
| <i>LRRC71</i>       | 0.148                                 |
| <i>NHLRC4</i>       | 0.148                                 |
| <i>ARHGDIB</i>      | 0.148                                 |
| <i>FOXF2</i>        | 0.149                                 |
| <i>LINC00472</i>    | 0.149                                 |

| <b>Gene Name</b>     | <b>Fold change relative to normal</b> |
|----------------------|---------------------------------------|
| <i>IL1RAP</i>        | 0.149                                 |
| <i>PRSS30P</i>       | 0.149                                 |
| <i>FTLP3</i>         | 0.149                                 |
| <i>RP4-555D20.2</i>  | 0.149                                 |
| <i>ART4</i>          | 0.149                                 |
| <i>MIR23A</i>        | 0.149                                 |
| <i>RP11-793H13.3</i> | 0.149                                 |
| <i>RASL12</i>        | 0.149                                 |
| <i>RP11-340F14.6</i> | 0.149                                 |
| <i>TMEM130</i>       | 0.149                                 |
| <i>SLC31A2</i>       | 0.149                                 |
| <i>RP11-597D13.9</i> | 0.149                                 |
| <i>ATP8B5P</i>       | 0.149                                 |
| <i>ZEB2-AS1</i>      | 0.149                                 |
| <i>TMC8</i>          | 0.150                                 |
| <i>RP5-887A10.1</i>  | 0.150                                 |
| <i>DOCK2</i>         | 0.150                                 |
| <i>RP5-899B16.1</i>  | 0.150                                 |
| <i>PGM5</i>          | 0.150                                 |
| <i>GBGT1</i>         | 0.150                                 |
| <i>BCAT1</i>         | 0.150                                 |
| <i>MST1L</i>         | 0.150                                 |
| <i>PYCARD</i>        | 0.150                                 |
| <i>CD1B</i>          | 0.150                                 |
| <i>IGFBP4</i>        | 0.150                                 |
| <i>RP11-800A3.2</i>  | 0.150                                 |
| <i>IL18RAP</i>       | 0.151                                 |
| <i>LSP1</i>          | 0.151                                 |
| <i>ITGA5</i>         | 0.151                                 |
| <i>NKAPL</i>         | 0.151                                 |
| <i>CRYAB</i>         | 0.151                                 |
| <i>RASSF8</i>        | 0.151                                 |
| <i>BOK</i>           | 0.151                                 |
| <i>KCNQ1</i>         | 0.151                                 |
| <i>HDC</i>           | 0.151                                 |
| <i>TNFRSF10C</i>     | 0.151                                 |
| <i>PLA2G15</i>       | 0.151                                 |
| <i>TMEM163</i>       | 0.151                                 |
| <i>EDNRA</i>         | 0.152                                 |
| <i>FGF7</i>          | 0.152                                 |
| <i>AC008063.2</i>    | 0.152                                 |
| <i>CASP1</i>         | 0.152                                 |
| <i>NRGN</i>          | 0.152                                 |
| <i>VGLL3</i>         | 0.152                                 |
| <i>CLDN5</i>         | 0.152                                 |
| <i>RP11-276H19.1</i> | 0.152                                 |
| <i>LAMB2</i>         | 0.152                                 |

| <b>Gene Name</b>     | <b>Fold change relative to normal</b> |
|----------------------|---------------------------------------|
| <i>MAGI2-AS3</i>     | 0.152                                 |
| <i>RHOBTB2</i>       | 0.152                                 |
| <i>DOCK8</i>         | 0.152                                 |
| <i>FMO3</i>          | 0.153                                 |
| <i>SNX20</i>         | 0.153                                 |
| <i>MYOF</i>          | 0.153                                 |
| <i>TMC5</i>          | 0.153                                 |
| <i>MGP</i>           | 0.153                                 |
| <i>SPDEF</i>         | 0.153                                 |
| <i>SLAMF8</i>        | 0.153                                 |
| <i>MEFV</i>          | 0.153                                 |
| <i>SPRED1</i>        | 0.153                                 |
| <i>CAMK1G</i>        | 0.153                                 |
| <i>RTN4RL1</i>       | 0.153                                 |
| <i>RP11-276H7.2</i>  | 0.154                                 |
| <i>GPR85</i>         | 0.154                                 |
| <i>KLHL4</i>         | 0.154                                 |
| <i>SNCG</i>          | 0.154                                 |
| <i>STARD13</i>       | 0.154                                 |
| <i>NFKBIA</i>        | 0.154                                 |
| <i>LEPR</i>          | 0.154                                 |
| <i>SEC14L4</i>       | 0.154                                 |
| <i>TMEM88</i>        | 0.154                                 |
| <i>CATIP-AS1</i>     | 0.154                                 |
| <i>C11orf88</i>      | 0.154                                 |
| <i>LMO7</i>          | 0.154                                 |
| <i>SELP</i>          | 0.154                                 |
| <i>GS1-115G20.1</i>  | 0.155                                 |
| <i>RP11-863P13.4</i> | 0.155                                 |
| <i>FAM216B</i>       | 0.155                                 |
| <i>CD40LG</i>        | 0.155                                 |
| <i>LHFPL3-AS1</i>    | 0.155                                 |
| <i>RP11-8L8.2</i>    | 0.155                                 |
| <i>RP11-557H15.4</i> | 0.155                                 |
| <i>CEBPB</i>         | 0.155                                 |
| <i>CCND1</i>         | 0.155                                 |
| <i>HSD11B1</i>       | 0.155                                 |
| <i>GIMAP6</i>        | 0.155                                 |
| <i>RP11-160E2.17</i> | 0.155                                 |
| <i>GALNT18</i>       | 0.156                                 |
| <i>TNFRSF1A</i>      | 0.156                                 |
| <i>WDR86-AS1</i>     | 0.156                                 |
| <i>RP11-472F19.1</i> | 0.156                                 |
| <i>RPS6KA2</i>       | 0.156                                 |
| <i>RNF125</i>        | 0.156                                 |
| <i>RP11-283G6.3</i>  | 0.156                                 |
| <i>OSM</i>           | 0.157                                 |

| <b>Gene Name</b>     | <b>Fold change relative to normal</b> |
|----------------------|---------------------------------------|
| <i>NLRP3</i>         | 0.157                                 |
| <i>TNFRSF12A</i>     | 0.157                                 |
| <i>TWIST2</i>        | 0.157                                 |
| <i>RP11-483P21.2</i> | 0.157                                 |
| <i>RP11-356K23.1</i> | 0.157                                 |
| <i>MLKL</i>          | 0.157                                 |
| <i>FCRL1</i>         | 0.157                                 |
| <i>TMEM37</i>        | 0.157                                 |
| <i>CDHR4</i>         | 0.157                                 |
| <i>TMEM144</i>       | 0.157                                 |
| <i>PPP1R15A</i>      | 0.157                                 |
| <i>PLTP</i>          | 0.158                                 |
| <i>ROPN1L</i>        | 0.158                                 |
| <i>DOK3</i>          | 0.158                                 |
| <i>PLEKHO2</i>       | 0.158                                 |
| <i>WFS1</i>          | 0.158                                 |
| <i>PDE4D</i>         | 0.158                                 |
| <i>VDR</i>           | 0.158                                 |
| <i>CLCF1</i>         | 0.158                                 |
| <i>TIMM8AP1</i>      | 0.158                                 |
| <i>RP11-647P12.1</i> | 0.158                                 |
| <i>RP4-541C22.5</i>  | 0.158                                 |
| <i>HAVCR2</i>        | 0.158                                 |
| <i>AL365331.2</i>    | 0.158                                 |
| <i>RFTN1</i>         | 0.158                                 |
| <i>CLEC10A</i>       | 0.158                                 |
| <i>LCN2</i>          | 0.158                                 |
| <i>AC096558.1</i>    | 0.158                                 |
| <i>EGR3</i>          | 0.158                                 |
| <i>MMRN1</i>         | 0.158                                 |
| <i>MVP</i>           | 0.158                                 |
| <i>GLIPR1</i>        | 0.159                                 |
| <i>PGM5P4</i>        | 0.159                                 |
| <i>AMY1A</i>         | 0.159                                 |
| <i>GPR39</i>         | 0.159                                 |
| <i>IL16</i>          | 0.159                                 |
| <i>S100A11</i>       | 0.159                                 |
| <i>RP11-27M24.2</i>  | 0.159                                 |
| <i>LG14</i>          | 0.159                                 |
| <i>ERG</i>           | 0.160                                 |
| <i>PID1</i>          | 0.160                                 |
| <i>STAP1</i>         | 0.160                                 |
| <i>WAS</i>           | 0.160                                 |
| <i>CHI3L1</i>        | 0.160                                 |
| <i>CSTA</i>          | 0.160                                 |
| <i>PALM3</i>         | 0.160                                 |
| <i>CCDC17</i>        | 0.160                                 |

| <b>Gene Name</b>     | <b>Fold change relative to normal</b> |
|----------------------|---------------------------------------|
| <i>EMILIN2</i>       | 0.160                                 |
| <i>IGFALS</i>        | 0.161                                 |
| <i>AP000439.2</i>    | 0.161                                 |
| <i>CD101</i>         | 0.161                                 |
| <i>OR7E47P</i>       | 0.161                                 |
| <i>SPNS2</i>         | 0.161                                 |
| <i>SNHG18</i>        | 0.161                                 |
| <i>PARVG</i>         | 0.161                                 |
| <i>CSGALNACT1</i>    | 0.161                                 |
| <i>C10orf10</i>      | 0.161                                 |
| <i>PDK4</i>          | 0.161                                 |
| <i>IRX5</i>          | 0.161                                 |
| <i>GSG1L</i>         | 0.161                                 |
| <i>CXorf21</i>       | 0.161                                 |
| <i>PCED1B-AS1</i>    | 0.162                                 |
| <i>SLC9A3R2</i>      | 0.162                                 |
| <i>NINJ2</i>         | 0.162                                 |
| <i>SLC38A5</i>       | 0.162                                 |
| <i>CTD-2547H18.1</i> | 0.162                                 |
| <i>XAGE1B</i>        | 0.162                                 |
| <i>LRCOL1</i>        | 0.162                                 |
| <i>C2orf54</i>       | 0.162                                 |
| <i>PLEK</i>          | 0.162                                 |
| <i>AMY1B</i>         | 0.162                                 |
| <i>ARHGAP30</i>      | 0.162                                 |
| <i>BMPR1B</i>        | 0.162                                 |
| <i>WBSCR17</i>       | 0.162                                 |
| <i>RP6-99M1.3</i>    | 0.162                                 |
| <i>Y_RNA</i>         | 0.162                                 |
| <i>AC098617.1</i>    | 0.163                                 |
| <i>DEFA1</i>         | 0.163                                 |
| <i>SCN1A</i>         | 0.163                                 |
| <i>SSMEM1</i>        | 0.163                                 |
| <i>CMKLR1</i>        | 0.163                                 |
| <i>SOX7</i>          | 0.163                                 |
| <i>CRTAP</i>         | 0.163                                 |
| <i>MIR3677</i>       | 0.163                                 |
| <i>PRSS8</i>         | 0.164                                 |
| <i>IRF8</i>          | 0.164                                 |
| <i>RP11-26P13.2</i>  | 0.164                                 |
| <i>FUCA1</i>         | 0.164                                 |
| <i>KCNE1</i>         | 0.164                                 |
| <i>RP11-114M1.1</i>  | 0.164                                 |
| <i>PPP1R14C</i>      | 0.164                                 |
| <i>C4BPAP1</i>       | 0.164                                 |
| <i>RP11-716O23.2</i> | 0.164                                 |
| <i>C16orf54</i>      | 0.164                                 |

| <b>Gene Name</b>      | <b>Fold change relative to normal</b> |
|-----------------------|---------------------------------------|
| <i>C4BPB</i>          | 0.164                                 |
| <i>TRGV7</i>          | 0.164                                 |
| <i>GRN</i>            | 0.165                                 |
| <i>FZD4</i>           | 0.165                                 |
| <i>CTB-60B18.18</i>   | 0.165                                 |
| <i>MBL1P</i>          | 0.165                                 |
| <i>RPL7P19</i>        | 0.165                                 |
| <i>SCUBE1</i>         | 0.165                                 |
| <i>METTL7B</i>        | 0.166                                 |
| <i>PIEZO1</i>         | 0.166                                 |
| <i>HLA-E</i>          | 0.166                                 |
| <i>RP11-23D24.2</i>   | 0.166                                 |
| <i>CD300E</i>         | 0.166                                 |
| <i>CXorf36</i>        | 0.166                                 |
| <i>KCNAB1</i>         | 0.166                                 |
| <i>LRRC4B</i>         | 0.166                                 |
| <i>AC006159.5</i>     | 0.167                                 |
| <i>F10</i>            | 0.167                                 |
| <i>SYNE1</i>          | 0.167                                 |
| <i>TLR3</i>           | 0.167                                 |
| <i>RP11-153M7.5</i>   | 0.167                                 |
| <i>ATXN1</i>          | 0.167                                 |
| <i>GUCY1A2</i>        | 0.167                                 |
| <i>RP11-1334A24.6</i> | 0.167                                 |
| <i>SPRY4</i>          | 0.167                                 |
| <i>AC093673.5</i>     | 0.167                                 |
| <i>AC124861.1</i>     | 0.168                                 |
| <i>GAS2L2</i>         | 0.168                                 |
| <i>RP5-1091N2.9</i>   | 0.168                                 |
| <i>CCL21</i>          | 0.168                                 |
| <i>KIF17</i>          | 0.168                                 |
| <i>NDRG2</i>          | 0.168                                 |
| <i>RSPO3</i>          | 0.168                                 |
| <i>WDR63</i>          | 0.168                                 |
| <i>RAC2</i>           | 0.168                                 |
| <i>HMGB3P10</i>       | 0.169                                 |
| <i>CXCL13</i>         | 0.169                                 |
| <i>SPATA18</i>        | 0.169                                 |
| <i>DUSP6</i>          | 0.169                                 |
| <i>GPR34</i>          | 0.169                                 |
| <i>C1orf132</i>       | 0.169                                 |
| <i>DAPP1</i>          | 0.169                                 |
| <i>RP11-692N5.2</i>   | 0.169                                 |
| <i>GCOM1</i>          | 0.169                                 |
| <i>MIR126</i>         | 0.169                                 |
| <i>ARSJ</i>           | 0.169                                 |
| <i>DNAH12</i>         | 0.170                                 |

| <b>Gene Name</b>      | <b>Fold change relative to normal</b> |
|-----------------------|---------------------------------------|
| <i>MILR1</i>          | 0.170                                 |
| <i>P2RX7</i>          | 0.170                                 |
| <i>FTO-IT1</i>        | 0.170                                 |
| <i>EVPL</i>           | 0.170                                 |
| <i>RP11-169D4.1</i>   | 0.170                                 |
| <i>RP11-779O18.1</i>  | 0.171                                 |
| <i>HORMAD2</i>        | 0.171                                 |
| <i>BCL6B</i>          | 0.171                                 |
| <i>CA13</i>           | 0.171                                 |
| <i>FCGR2B</i>         | 0.171                                 |
| <i>CTSZ</i>           | 0.171                                 |
| <i>SSPN</i>           | 0.171                                 |
| <i>CTSB</i>           | 0.171                                 |
| <i>TACC1</i>          | 0.171                                 |
| <i>AC096921.2</i>     | 0.171                                 |
| <i>AKR1C2</i>         | 0.171                                 |
| <i>PEAR1</i>          | 0.172                                 |
| <i>LAMC3</i>          | 0.172                                 |
| <i>RP11-389C8.2</i>   | 0.172                                 |
| <i>CTA-363E6.6</i>    | 0.172                                 |
| <i>CTSE</i>           | 0.172                                 |
| <i>PLCD1</i>          | 0.172                                 |
| <i>POU1F1</i>         | 0.172                                 |
| <i>ABI3</i>           | 0.172                                 |
| <i>IL10RA</i>         | 0.172                                 |
| <i>PKNOX2</i>         | 0.172                                 |
| <i>CFH</i>            | 0.172                                 |
| <i>AGR3</i>           | 0.172                                 |
| <i>AKAP14</i>         | 0.172                                 |
| <i>MRGPRX2</i>        | 0.172                                 |
| <i>BANK1</i>          | 0.172                                 |
| <i>KCNK6</i>          | 0.173                                 |
| <i>LILRA2</i>         | 0.173                                 |
| <i>MT1L</i>           | 0.173                                 |
| <i>COMT</i>           | 0.173                                 |
| <i>OR7E36P</i>        | 0.173                                 |
| <i>ABCA4</i>          | 0.173                                 |
| <i>OMD</i>            | 0.173                                 |
| <i>PTPLAD2</i>        | 0.173                                 |
| <i>TM4SF1</i>         | 0.173                                 |
| <i>SOX8</i>           | 0.174                                 |
| <i>RP11-59D5__B.2</i> | 0.174                                 |
| <i>NCKAP1L</i>        | 0.174                                 |
| <i>TXNIP</i>          | 0.174                                 |
| <i>FTCDNL1</i>        | 0.174                                 |
| <i>HSPB7</i>          | 0.174                                 |
| <i>SMIM1</i>          | 0.174                                 |

| <b>Gene Name</b>     | <b>Fold change relative to normal</b> |
|----------------------|---------------------------------------|
| <i>RARA-AS1</i>      | 0.174                                 |
| <i>RP11-3K16.2</i>   | 0.174                                 |
| <i>SGMS1</i>         | 0.174                                 |
| <i>CECR1</i>         | 0.174                                 |
| <i>PLA2G5</i>        | 0.174                                 |
| <i>RP11-368J21.3</i> | 0.175                                 |
| <i>DES</i>           | 0.175                                 |
| <i>EFCC1</i>         | 0.175                                 |
| <i>NR2F2-AS1</i>     | 0.175                                 |
| <i>CXCR5</i>         | 0.175                                 |
| <i>EDEM1</i>         | 0.175                                 |
| <i>ACSM2B</i>        | 0.175                                 |
| <i>VEGFC</i>         | 0.175                                 |
| <i>JDP2</i>          | 0.175                                 |
| <i>RNU1-38P</i>      | 0.175                                 |
| <i>ARPC1B</i>        | 0.175                                 |
| <i>CLEC4A</i>        | 0.175                                 |
| <i>RP1-151F17.1</i>  | 0.175                                 |
| <i>ERBB2</i>         | 0.175                                 |
| <i>AC020594.5</i>    | 0.176                                 |
| <i>CDKL2</i>         | 0.176                                 |
| <i>CD109</i>         | 0.176                                 |
| <i>ITPRIP</i>        | 0.176                                 |
| <i>CD79B</i>         | 0.176                                 |
| <i>ARL11</i>         | 0.177                                 |
| <i>SLC16A12</i>      | 0.177                                 |
| <i>NR4A3</i>         | 0.177                                 |
| <i>LCP1</i>          | 0.177                                 |
| <i>PSORS1C1</i>      | 0.177                                 |
| <i>PROCR</i>         | 0.177                                 |
| <i>IL7</i>           | 0.177                                 |
| <i>NMUR1</i>         | 0.177                                 |
| <i>AC061992.2</i>    | 0.177                                 |
| <i>RAB43</i>         | 0.178                                 |
| <i>IL15RA</i>        | 0.178                                 |
| <i>KCNA3</i>         | 0.178                                 |
| <i>CCDC64B</i>       | 0.178                                 |
| <i>SCD</i>           | 0.178                                 |
| <i>KCNQ3</i>         | 0.178                                 |
| <i>ECM2</i>          | 0.178                                 |
| <i>NTM</i>           | 0.179                                 |
| <i>RP11-370F5.4</i>  | 0.179                                 |
| <i>CTD-3224I3.3</i>  | 0.179                                 |
| <i>LINC00035</i>     | 0.179                                 |
| <i>C1orf158</i>      | 0.179                                 |
| <i>MFAP5</i>         | 0.179                                 |
| <i>RP11-378A13.1</i> | 0.179                                 |



| <b>Gene Name</b>      | <b>Fold change relative to normal</b> |
|-----------------------|---------------------------------------|
| <i>RPL9P33</i>        | 0.179                                 |
| <i>DIO3</i>           | 0.179                                 |
| <i>LHFPL3</i>         | 0.179                                 |
| <i>SAMHD1</i>         | 0.180                                 |
| <i>AC092375.1</i>     | 0.180                                 |
| <i>CARD9</i>          | 0.180                                 |
| <i>DPYD</i>           | 0.180                                 |
| <i>MMP25</i>          | 0.180                                 |
| <i>FOLR2</i>          | 0.180                                 |
| <i>RP11-561I11.3</i>  | 0.180                                 |
| <i>IFNGR1</i>         | 0.180                                 |
| <i>LINC00402</i>      | 0.180                                 |
| <i>VTN</i>            | 0.180                                 |
| <i>CYTIP</i>          | 0.180                                 |
| <i>GPC4</i>           | 0.180                                 |
| <i>PRICKLE1</i>       | 0.180                                 |
| <i>AKAP7</i>          | 0.181                                 |
| <i>RAB20</i>          | 0.181                                 |
| <i>TBC1D10C</i>       | 0.181                                 |
| <i>CCND2</i>          | 0.181                                 |
| <i>SELM</i>           | 0.181                                 |
| <i>BTBD19</i>         | 0.181                                 |
| <i>CTD-3105H18.14</i> | 0.182                                 |
| <i>RP11-136H19.1</i>  | 0.182                                 |
| <i>TOR4A</i>          | 0.182                                 |
| <i>MAGI1-AS1</i>      | 0.182                                 |
| <i>RP11-332H18.5</i>  | 0.182                                 |
| <i>EIF4EBP3</i>       | 0.182                                 |
| <i>TNRC6C-AS1</i>     | 0.182                                 |
| <i>RAB40A</i>         | 0.183                                 |
| <i>MT1X</i>           | 0.183                                 |
| <i>HTR1F</i>          | 0.183                                 |
| <i>MPEG1</i>          | 0.183                                 |
| <i>DAPK1</i>          | 0.183                                 |
| <i>RBMS2</i>          | 0.183                                 |
| <i>SYNPO2</i>         | 0.183                                 |
| <i>TYMP</i>           | 0.183                                 |
| <i>MS4A6A</i>         | 0.183                                 |
| <i>DEFB124</i>        | 0.183                                 |
| <i>RP13-258O15.1</i>  | 0.183                                 |
| <i>GSAP</i>           | 0.183                                 |
| <i>RP5-1042I8.7</i>   | 0.183                                 |
| <i>ITGB4</i>          | 0.184                                 |
| <i>TSPAN4</i>         | 0.184                                 |
| <i>ARID5B</i>         | 0.184                                 |
| <i>C22orf34</i>       | 0.184                                 |
| <i>IL12RB1</i>        | 0.184                                 |

| <b>Gene Name</b>      | <b>Fold change relative to normal</b> |
|-----------------------|---------------------------------------|
| <i>MBNL1-AS1</i>      | 0.184                                 |
| <i>LYL1</i>           | 0.184                                 |
| <i>CPNE8</i>          | 0.185                                 |
| <i>RP11-342A23.2</i>  | 0.185                                 |
| <i>RARA</i>           | 0.185                                 |
| <i>RP11-231P20.2</i>  | 0.185                                 |
| <i>LINC00996</i>      | 0.185                                 |
| <i>HMHA1</i>          | 0.185                                 |
| <i>RP11-13N12.1</i>   | 0.185                                 |
| <i>MARCH2</i>         | 0.186                                 |
| <i>MAPKAPK3</i>       | 0.186                                 |
| <i>CDK15</i>          | 0.186                                 |
| <i>CCL22</i>          | 0.186                                 |
| <i>PCDP1</i>          | 0.186                                 |
| <i>LUM</i>            | 0.186                                 |
| <i>PABPC5</i>         | 0.186                                 |
| <i>CD244</i>          | 0.186                                 |
| <i>RP11-568K15.1</i>  | 0.186                                 |
| <i>IQGAP2</i>         | 0.186                                 |
| <i>TTN</i>            | 0.186                                 |
| <i>PRKCD</i>          | 0.186                                 |
| <i>RNASE6</i>         | 0.186                                 |
| <i>LL22NC03-86G7.</i> | 0.187                                 |
| <i>IER2</i>           | 0.187                                 |
| <i>GIMAP7</i>         | 0.187                                 |
| <i>AC007405.4</i>     | 0.187                                 |
| <i>EGFL6</i>          | 0.187                                 |
| <i>MATK</i>           | 0.187                                 |
| <i>RP13-884E18.2</i>  | 0.188                                 |
| <i>RBM47</i>          | 0.188                                 |
| <i>CPEB2</i>          | 0.188                                 |
| <i>GIMAP5</i>         | 0.188                                 |
| <i>SLC6A7</i>         | 0.189                                 |
| <i>GAS1</i>           | 0.189                                 |
| <i>RMDN3</i>          | 0.189                                 |
| <i>DPT</i>            | 0.189                                 |
| <i>GYPB</i>           | 0.189                                 |
| <i>TMEM64</i>         | 0.189                                 |
| <i>NOD2</i>           | 0.189                                 |
| <i>DOK4</i>           | 0.189                                 |
| <i>C19orf38</i>       | 0.189                                 |
| <i>SERPINB1</i>       | 0.190                                 |
| <i>RP11-354P11.4</i>  | 0.190                                 |
| <i>NKD2</i>           | 0.190                                 |
| <i>TNFSF14</i>        | 0.190                                 |
| <i>RP4-728D4.2</i>    | 0.190                                 |
| <i>RP11-845C23.2</i>  | 0.190                                 |

| <b>Gene Name</b>     | <b>Fold change relative to normal</b> |
|----------------------|---------------------------------------|
| <i>SERTAD1</i>       | 0.190                                 |
| <i>PPM1M</i>         | 0.190                                 |
| <i>ENPP2</i>         | 0.190                                 |
| <i>ATP11A</i>        | 0.190                                 |
| <i>RP11-46D6.1</i>   | 0.190                                 |
| <i>RP5-875H18.9</i>  | 0.190                                 |
| <i>C7orf72</i>       | 0.190                                 |
| <i>ARHGAP24</i>      | 0.191                                 |
| <i>ARHGAP15</i>      | 0.191                                 |
| <i>TRPM4</i>         | 0.191                                 |
| <i>IGSF6</i>         | 0.191                                 |
| <i>RP11-64B16.4</i>  | 0.191                                 |
| <i>THRB</i>          | 0.191                                 |
| <i>RP11-714G18.1</i> | 0.191                                 |
| <i>LRRC4</i>         | 0.192                                 |
| <i>RGS5</i>          | 0.192                                 |
| <i>TNS4</i>          | 0.192                                 |
| <i>ACKR1</i>         | 0.192                                 |
| <i>GIMAP2</i>        | 0.192                                 |
| <i>SASH1</i>         | 0.192                                 |
| <i>CTB-133G6.1</i>   | 0.192                                 |
| <i>MKX</i>           | 0.192                                 |
| <i>KCNA3</i>         | 0.192                                 |
| <i>HCST</i>          | 0.192                                 |
| <i>PHYHD1</i>        | 0.192                                 |
| <i>TESPA1</i>        | 0.192                                 |
| <i>TACC2</i>         | 0.193                                 |
| <i>PXMP4</i>         | 0.193                                 |
| <i>BMPER</i>         | 0.193                                 |
| <i>KCNA5</i>         | 0.193                                 |
| <i>PSAP</i>          | 0.193                                 |
| <i>ANGPTL5</i>       | 0.193                                 |
| <i>KDR</i>           | 0.193                                 |
| <i>LY96</i>          | 0.193                                 |
| <i>RP11-366M4.11</i> | 0.193                                 |
| <i>GRIN3B</i>        | 0.193                                 |
| <i>COL28A1</i>       | 0.193                                 |
| <i>CTA-445C9.15</i>  | 0.193                                 |
| <i>RP5-978I12.1</i>  | 0.193                                 |
| <i>HEG1</i>          | 0.193                                 |
| <i>SLC5A5</i>        | 0.193                                 |
| <i>LINC01290</i>     | 0.193                                 |
| <i>RP4-782L23.1</i>  | 0.193                                 |
| <i>CD34</i>          | 0.193                                 |
| <i>RXRG</i>          | 0.193                                 |
| <i>RP11-138H10.2</i> | 0.194                                 |
| <i>MXRA8</i>         | 0.194                                 |

| <b>Gene Name</b>     | <b>Fold change relative to normal</b> |
|----------------------|---------------------------------------|
| <i>BTC</i>           | 0.194                                 |
| <i>KCNS3</i>         | 0.194                                 |
| <i>NCAM2</i>         | 0.194                                 |
| <i>DYNLRB2</i>       | 0.194                                 |
| <i>FAM71A</i>        | 0.194                                 |
| <i>PRKCQ-AS1</i>     | 0.194                                 |
| <i>PIK3IP1</i>       | 0.194                                 |
| <i>CATIP-AS2</i>     | 0.195                                 |
| <i>CD14</i>          | 0.195                                 |
| <i>NCEH1</i>         | 0.195                                 |
| <i>USP44</i>         | 0.195                                 |
| <i>PDCD1LG2</i>      | 0.195                                 |
| <i>RP11-815J21.1</i> | 0.195                                 |
| <i>OTUD1</i>         | 0.195                                 |
| <i>LINC01336</i>     | 0.195                                 |
| <i>PCDHGA10</i>      | 0.195                                 |
| <i>PTPN14</i>        | 0.195                                 |
| <i>CDKL1</i>         | 0.196                                 |
| <i>IKZF1</i>         | 0.196                                 |
| <i>SH3D19</i>        | 0.196                                 |
| <i>DDR2</i>          | 0.196                                 |
| <i>NPL</i>           | 0.196                                 |
| <i>RP11-38P22.2</i>  | 0.196                                 |
| <i>FAM198B</i>       | 0.196                                 |
| <i>GFPT2</i>         | 0.197                                 |
| <i>TSPAN19</i>       | 0.197                                 |
| <i>LYN</i>           | 0.197                                 |
| <i>SNX25</i>         | 0.197                                 |
| <i>MIR6124</i>       | 0.197                                 |
| <i>CTC-205M6.5</i>   | 0.197                                 |
| <i>SH2D4A</i>        | 0.198                                 |
| <i>TMCC3</i>         | 0.198                                 |
| <i>MROH6</i>         | 0.198                                 |
| <i>SNX33</i>         | 0.198                                 |
| <i>LMNA</i>          | 0.198                                 |
| <i>ARHGAP29</i>      | 0.198                                 |
| <i>PRCD</i>          | 0.198                                 |
| <i>HSD17B13</i>      | 0.199                                 |
| <i>TRIP6</i>         | 0.199                                 |
| <i>TM4SF18</i>       | 0.199                                 |
| <i>LPCAT2</i>        | 0.199                                 |
| <i>CBX7</i>          | 0.199                                 |
| <i>FAM209B</i>       | 0.199                                 |
| <i>C10orf67</i>      | 0.199                                 |
| <i>ETV1</i>          | 0.199                                 |
| <i>CARNS1</i>        | 0.199                                 |
| <i>TMC6</i>          | 0.199                                 |

| <b>Gene Name</b>      | <b>Fold change relative to normal</b> |
|-----------------------|---------------------------------------|
| <i>RAMP2</i>          | 0.199                                 |
| <i>CCL24</i>          | 0.199                                 |
| <i>PLAGL1</i>         | 0.200                                 |
| <i>GALNT15</i>        | 0.200                                 |
| <i>CTD-3128G10.7</i>  | 0.200                                 |
| <i>PTPRC</i>          | 0.200                                 |
| <i>IGF1</i>           | 0.200                                 |
| <i>FTH1</i>           | 0.200                                 |
| <i>EFNA1</i>          | 0.200                                 |
| <i>LINC01093</i>      | 0.200                                 |
| <i>CXCL12</i>         | 0.201                                 |
| <i>IQSEC2</i>         | 0.201                                 |
| <i>REST</i>           | 0.201                                 |
| <i>SLC26A9</i>        | 0.201                                 |
| <i>EDA2R</i>          | 0.201                                 |
| <i>PZP</i>            | 0.201                                 |
| <i>COX4I2</i>         | 0.201                                 |
| <i>CREG1</i>          | 0.202                                 |
| <i>RP11-345J18.2</i>  | 0.202                                 |
| <i>CPQ</i>            | 0.202                                 |
| <i>ZNF750</i>         | 0.202                                 |
| <i>RP11-122K13.7</i>  | 0.202                                 |
| <i>PLIN5</i>          | 0.202                                 |
| <i>RIN1</i>           | 0.202                                 |
| <i>ANK3</i>           | 0.202                                 |
| <i>TEKT1</i>          | 0.202                                 |
| <i>PRICKLE2</i>       | 0.202                                 |
| <i>TSPAN18</i>        | 0.202                                 |
| <i>PCDH12</i>         | 0.203                                 |
| <i>PTPN22</i>         | 0.203                                 |
| <i>RP11-357N13.2</i>  | 0.203                                 |
| <i>PLD1</i>           | 0.203                                 |
| <i>RP11-582J16.4</i>  | 0.203                                 |
| <i>RPL26P30</i>       | 0.203                                 |
| <i>MGAT1</i>          | 0.203                                 |
| <i>LDLRAD1</i>        | 0.203                                 |
| <i>RNF149</i>         | 0.203                                 |
| <i>ST3GAL5</i>        | 0.203                                 |
| <i>RP11-434H14.1</i>  | 0.203                                 |
| <i>RP11-473M20.16</i> | 0.203                                 |
| <i>PTGIR</i>          | 0.203                                 |
| <i>CGN</i>            | 0.203                                 |
| <i>RP11-151D14.1</i>  | 0.204                                 |
| <i>NCMAP</i>          | 0.204                                 |
| <i>MT-TN</i>          | 0.204                                 |
| <i>GOLGA2P7</i>       | 0.204                                 |
| <i>BIRC3</i>          | 0.205                                 |

| <b>Gene Name</b>     | <b>Fold change relative to normal</b> |
|----------------------|---------------------------------------|
| <i>ERICH2</i>        | 0.205                                 |
| <i>PLL</i>           | 0.205                                 |
| <i>GAB1</i>          | 0.205                                 |
| <i>MIR222HG</i>      | 0.205                                 |
| <i>QSOX1</i>         | 0.205                                 |
| <i>MT1E</i>          | 0.205                                 |
| <i>C1orf87</i>       | 0.205                                 |
| <i>LGALS9</i>        | 0.205                                 |
| <i>MYD88</i>         | 0.205                                 |
| <i>CUBN</i>          | 0.205                                 |
| <i>Y_RNA</i>         | 0.206                                 |
| <i>AC026202.3</i>    | 0.206                                 |
| <i>SMAGP</i>         | 0.206                                 |
| <i>GIMAP4</i>        | 0.206                                 |
| <i>DKK3</i>          | 0.206                                 |
| <i>PCDHAC2</i>       | 0.206                                 |
| <i>SNED1</i>         | 0.206                                 |
| <i>RP11-347C12.3</i> | 0.206                                 |
| <i>GRK5</i>          | 0.206                                 |
| <i>VILL</i>          | 0.207                                 |
| <i>RNU6-917P</i>     | 0.207                                 |
| <i>CYTH4</i>         | 0.207                                 |
| <i>ZFP36L2</i>       | 0.207                                 |
| <i>AMN</i>           | 0.207                                 |
| <i>PPP1R1B</i>       | 0.207                                 |
| <i>RP11-472N13.3</i> | 0.207                                 |
| <i>PTPRM</i>         | 0.208                                 |
| <i>AC135178.7</i>    | 0.208                                 |
| <i>LINC01140</i>     | 0.208                                 |
| <i>GPR157</i>        | 0.208                                 |
| <i>ALDH1A2</i>       | 0.208                                 |
| <i>MT-TC</i>         | 0.208                                 |
| <i>PNPLA6</i>        | 0.209                                 |
| <i>CYP1B1</i>        | 0.209                                 |
| <i>FTH1P15</i>       | 0.209                                 |
| <i>EVA1B</i>         | 0.209                                 |
| <i>GM2A</i>          | 0.209                                 |
| <i>MUM1L1</i>        | 0.209                                 |
| <i>EVA1C</i>         | 0.210                                 |
| <i>RNU6-1010P</i>    | 0.210                                 |
| <i>NABP1</i>         | 0.210                                 |
| <i>CYP2G1P</i>       | 0.210                                 |
| <i>HLA-DMB</i>       | 0.211                                 |
| <i>LPAR6</i>         | 0.211                                 |
| <i>PRDM6</i>         | 0.211                                 |
| <i>MED4-AS1</i>      | 0.211                                 |
| <i>F2RL3</i>         | 0.212                                 |

| <b>Gene Name</b>     | <b>Fold change relative to normal</b> |
|----------------------|---------------------------------------|
| <i>SIAE</i>          | 0.212                                 |
| <i>FILIP1L</i>       | 0.212                                 |
| <i>MYH1</i>          | 0.212                                 |
| <i>RCSD1</i>         | 0.212                                 |
| <i>BEST1</i>         | 0.212                                 |
| <i>APOD</i>          | 0.212                                 |
| <i>CTB-11I22.2</i>   | 0.212                                 |
| <i>LMF1</i>          | 0.212                                 |
| <i>RBMS2P1</i>       | 0.213                                 |
| <i>ANXA2</i>         | 0.213                                 |
| <i>RHOF</i>          | 0.213                                 |
| <i>H1FNT</i>         | 0.213                                 |
| <i>LRP10</i>         | 0.213                                 |
| <i>SEMA6B</i>        | 0.213                                 |
| <i>RP11-6J21.2</i>   | 0.213                                 |
| <i>S100A6</i>        | 0.213                                 |
| <i>RP11-640B6.1</i>  | 0.214                                 |
| <i>PARD6B</i>        | 0.214                                 |
| <i>CELSR1</i>        | 0.214                                 |
| <i>LAMA2</i>         | 0.214                                 |
| <i>VAMP5</i>         | 0.214                                 |
| <i>SPINK14</i>       | 0.214                                 |
| <i>ACSS2</i>         | 0.215                                 |
| <i>CD79A</i>         | 0.215                                 |
| <i>FUT7</i>          | 0.215                                 |
| <i>SLC16A6</i>       | 0.215                                 |
| <i>HFE</i>           | 0.215                                 |
| <i>FCRLA</i>         | 0.216                                 |
| <i>CTSL</i>          | 0.216                                 |
| <i>PRKCE</i>         | 0.216                                 |
| <i>RAB32</i>         | 0.216                                 |
| <i>ADAMTS10</i>      | 0.216                                 |
| <i>AC026806.2</i>    | 0.216                                 |
| <i>TRIM6</i>         | 0.216                                 |
| <i>IL6ST</i>         | 0.216                                 |
| <i>RP11-218M22.1</i> | 0.217                                 |
| <i>LMOD1</i>         | 0.217                                 |
| <i>HAS2</i>          | 0.217                                 |
| <i>PPM1J</i>         | 0.217                                 |
| <i>CLIC2</i>         | 0.217                                 |
| <i>TNFRSF8</i>       | 0.217                                 |
| <i>VAMP8</i>         | 0.217                                 |
| <i>SMIM3</i>         | 0.217                                 |
| <i>GAA</i>           | 0.217                                 |
| <i>MIR23B</i>        | 0.218                                 |
| <i>FAXDC2</i>        | 0.218                                 |
| <i>ITM2A</i>         | 0.218                                 |

| <b>Gene Name</b>     | <b>Fold change relative to normal</b> |
|----------------------|---------------------------------------|
| <i>ANXA2P2</i>       | 0.218                                 |
| <i>VWA5A</i>         | 0.218                                 |
| <i>GPR4</i>          | 0.218                                 |
| <i>SLC27A1</i>       | 0.218                                 |
| <i>PLK3</i>          | 0.219                                 |
| <i>CSF1</i>          | 0.219                                 |
| <i>ALPK1</i>         | 0.219                                 |
| <i>TEX14</i>         | 0.219                                 |
| <i>CU639417.1</i>    | 0.219                                 |
| <i>CSTB</i>          | 0.219                                 |
| <i>ARHGEF6</i>       | 0.219                                 |
| <i>ADAP2</i>         | 0.219                                 |
| <i>LCP2</i>          | 0.219                                 |
| <i>GLDN</i>          | 0.219                                 |
| <i>GZMM</i>          | 0.220                                 |
| <i>PDGFA</i>         | 0.220                                 |
| <i>MAN2B1</i>        | 0.220                                 |
| <i>ITGA10</i>        | 0.220                                 |
| <i>TNFAIP3</i>       | 0.221                                 |
| <i>P2RY14</i>        | 0.221                                 |
| <i>MECOM</i>         | 0.221                                 |
| <i>KLHDC8B</i>       | 0.221                                 |
| <i>PITPNM3</i>       | 0.221                                 |
| <i>RP11-503N18.3</i> | 0.222                                 |
| <i>PCYOX1</i>        | 0.222                                 |
| <i>AL928768.3</i>    | 0.222                                 |
| <i>SLC7A2</i>        | 0.222                                 |
| <i>PARP15</i>        | 0.222                                 |
| <i>RP11-532F6.3</i>  | 0.222                                 |
| <i>EHD1</i>          | 0.222                                 |
| <i>GAS7</i>          | 0.223                                 |
| <i>GANC</i>          | 0.223                                 |
| <i>PAG1</i>          | 0.224                                 |
| <i>IRF5</i>          | 0.224                                 |
| <i>QKI</i>           | 0.224                                 |
| <i>SDC1</i>          | 0.224                                 |
| <i>PPL</i>           | 0.224                                 |
| <i>RP3-453C12.14</i> | 0.224                                 |
| <i>PRSS22</i>        | 0.224                                 |
| <i>TKT</i>           | 0.225                                 |
| <i>PQLC3</i>         | 0.225                                 |
| <i>COL14A1</i>       | 0.225                                 |
| <i>FAM46C</i>        | 0.226                                 |
| <i>ADAMTS9</i>       | 0.226                                 |
| <i>CD180</i>         | 0.226                                 |
| <i>RP11-94C24.13</i> | 0.226                                 |
| <i>LINC00935</i>     | 0.227                                 |



| <b>Gene Name</b>      | <b>Fold change relative to normal</b> |
|-----------------------|---------------------------------------|
| <i>SLC40A1</i>        | 0.227                                 |
| <i>ADAMTS4</i>        | 0.227                                 |
| <i>HLX</i>            | 0.227                                 |
| <i>LGALS9DP</i>       | 0.227                                 |
| <i>PSTPIP2</i>        | 0.227                                 |
| <i>EPHX2</i>          | 0.228                                 |
| <i>KLF6</i>           | 0.228                                 |
| <i>CD83</i>           | 0.228                                 |
| <i>TTC7A</i>          | 0.228                                 |
| <i>PARVB</i>          | 0.228                                 |
| <i>ST8SIA1</i>        | 0.228                                 |
| <i>AP001205.1</i>     | 0.228                                 |
| <i>CCDC135</i>        | 0.228                                 |
| <i>LAMC2</i>          | 0.229                                 |
| <i>SDC4</i>           | 0.229                                 |
| <i>KIF13A</i>         | 0.229                                 |
| <i>POLR3H</i>         | 0.229                                 |
| <i>ACAA1</i>          | 0.229                                 |
| <i>KCTD11</i>         | 0.230                                 |
| <i>SPTBN1</i>         | 0.230                                 |
| <i>TNS3</i>           | 0.230                                 |
| <i>RP11-1094H24.4</i> | 0.230                                 |
| <i>MANBA</i>          | 0.230                                 |
| <i>AC079767.4</i>     | 0.231                                 |
| <i>NOTCH2</i>         | 0.231                                 |
| <i>STK10</i>          | 0.231                                 |
| <i>ANXA11</i>         | 0.231                                 |
| <i>SEPT10P1</i>       | 0.231                                 |
| <i>TLR1</i>           | 0.232                                 |
| <i>GABARAPL1</i>      | 0.232                                 |
| <i>FEZ2</i>           | 0.232                                 |
| <i>GVINP1</i>         | 0.232                                 |
| <i>NDST1</i>          | 0.232                                 |
| <i>EPHA1-AS1</i>      | 0.232                                 |
| <i>RASAL3</i>         | 0.232                                 |
| <i>ANO2</i>           | 0.233                                 |
| <i>FAS</i>            | 0.233                                 |
| <i>INPP5D</i>         | 0.233                                 |
| <i>FMNL1</i>          | 0.233                                 |
| <i>LACTB</i>          | 0.233                                 |
| <i>CD1D</i>           | 0.233                                 |
| <i>PHACTR2</i>        | 0.233                                 |
| <i>ANKRD20A11P</i>    | 0.233                                 |
| <i>FAM92B</i>         | 0.233                                 |
| <i>TRGC2</i>          | 0.234                                 |
| <i>LGALS1</i>         | 0.234                                 |
| <i>RNF145</i>         | 0.235                                 |

| <b>Gene Name</b>     | <b>Fold change relative to normal</b> |
|----------------------|---------------------------------------|
| <i>PXDC1</i>         | 0.235                                 |
| <i>FAM179A</i>       | 0.235                                 |
| <i>ORAI3</i>         | 0.235                                 |
| <i>ZNF257</i>        | 0.235                                 |
| <i>FASN</i>          | 0.236                                 |
| <i>NAGPA</i>         | 0.236                                 |
| <i>TOM1</i>          | 0.237                                 |
| <i>RP11-723D22.3</i> | 0.237                                 |
| <i>CYSLTR1</i>       | 0.237                                 |
| <i>CEACAM4</i>       | 0.237                                 |
| <i>SLC2A3</i>        | 0.238                                 |
| <i>PPP2R5A</i>       | 0.238                                 |
| <i>SELL</i>          | 0.238                                 |
| <i>WWTR1</i>         | 0.238                                 |
| <i>ST6GALNAC6</i>    | 0.238                                 |
| <i>FHOD1</i>         | 0.238                                 |
| <i>RP5-1009N12.1</i> | 0.238                                 |
| <i>HCLS1</i>         | 0.238                                 |
| <i>C1S</i>           | 0.239                                 |
| <i>BMP1</i>          | 0.239                                 |
| <i>PPAP2B</i>        | 0.239                                 |
| <i>SOX18</i>         | 0.239                                 |
| <i>FAM78A</i>        | 0.239                                 |
| <i>RP11-53M11.3</i>  | 0.239                                 |
| <i>SUMF1</i>         | 0.239                                 |
| <i>RP11-111E14.1</i> | 0.239                                 |
| <i>TSPAN12</i>       | 0.239                                 |
| <i>FXD5</i>          | 0.239                                 |
| <i>SCARF2</i>        | 0.239                                 |
| <i>RP11-394B2.6</i>  | 0.239                                 |
| <i>TNFRSF1B</i>      | 0.240                                 |
| <i>PIK3CG</i>        | 0.240                                 |
| <i>IQSEC1</i>        | 0.240                                 |
| <i>ITGA3</i>         | 0.240                                 |
| <i>TNFSF9</i>        | 0.240                                 |
| <i>PLAUR</i>         | 0.240                                 |
| <i>EEF1A1P6</i>      | 0.241                                 |
| <i>AASS</i>          | 0.241                                 |
| <i>HRASLS2</i>       | 0.241                                 |
| <i>KRT7</i>          | 0.241                                 |
| <i>THRB-IT1</i>      | 0.241                                 |
| <i>CHP1</i>          | 0.241                                 |
| <i>RP11-62H7.2</i>   | 0.241                                 |
| <i>RP11-262D11.2</i> | 0.241                                 |
| <i>FCRLB</i>         | 0.241                                 |
| <i>RGS19</i>         | 0.241                                 |
| <i>MARVELD1</i>      | 0.241                                 |

| <b>Gene Name</b>      | <b>Fold change relative to normal</b> |
|-----------------------|---------------------------------------|
| <i>CLC</i>            | 0.242                                 |
| <i>AIM1</i>           | 0.242                                 |
| <i>RP11-556I13.2</i>  | 0.242                                 |
| <i>ZDHHC3</i>         | 0.242                                 |
| <i>EEF1DP1</i>        | 0.242                                 |
| <i>MYADM</i>          | 0.243                                 |
| <i>MYLK</i>           | 0.243                                 |
| <i>TPST2</i>          | 0.243                                 |
| <i>CCDC102A</i>       | 0.243                                 |
| <i>PIK3AP1</i>        | 0.243                                 |
| <i>B4GALT1-AS1</i>    | 0.243                                 |
| <i>LIMD1</i>          | 0.243                                 |
| <i>RP11-249C24.10</i> | 0.243                                 |
| <i>STK17B</i>         | 0.244                                 |
| <i>ICAM3</i>          | 0.244                                 |
| <i>RP11-473M20.5</i>  | 0.244                                 |
| <i>ATP1B2</i>         | 0.244                                 |
| <i>C8orf58</i>        | 0.244                                 |
| <i>RP11-24F11.2</i>   | 0.245                                 |
| <i>NEIL1</i>          | 0.245                                 |
| <i>ST6GALNAC2</i>     | 0.245                                 |
| <i>ACTN2</i>          | 0.246                                 |
| <i>MT2A</i>           | 0.246                                 |
| <i>RP11-367J11.2</i>  | 0.246                                 |
| <i>CTC-510F12.4</i>   | 0.246                                 |
| <i>RP11-245J9.6</i>   | 0.247                                 |
| <i>MAN2B2</i>         | 0.247                                 |
| <i>ALDH1A3</i>        | 0.248                                 |
| <i>ANTXRPL1</i>       | 0.248                                 |
| <i>RP1-93H18.7</i>    | 0.248                                 |
| <i>VAMP7</i>          | 0.248                                 |
| <i>PLEC</i>           | 0.248                                 |
| <i>RP11-58E21.3</i>   | 0.249                                 |
| <i>RP11-420A23.1</i>  | 0.249                                 |
| <i>MS4A1</i>          | 0.249                                 |
| <i>CTDSPL</i>         | 0.249                                 |
| <i>C4orf32</i>        | 0.249                                 |
| <i>FCHO2</i>          | 0.249                                 |
| <i>ZBTB4</i>          | 0.249                                 |
| <i>C1orf194</i>       | 0.249                                 |
| <i>GBP3</i>           | 0.249                                 |
| <i>OCLN</i>           | 0.250                                 |
| <i>NUDT18</i>         | 0.250                                 |
| <i>FHL1</i>           | 0.250                                 |
| <i>KCNE3</i>          | 0.250                                 |
| <i>ABCA9</i>          | 0.250                                 |
| <i>MR1</i>            | 0.250                                 |

| <b>Gene Name</b>     | <b>Fold change relative to normal</b> |
|----------------------|---------------------------------------|
| <i>RHOQP2</i>        | 0.250                                 |
| <i>SH3KBP1</i>       | 0.250                                 |
| <i>TNKS1BP1</i>      | 0.250                                 |
| <i>ROBO3</i>         | 0.251                                 |
| <i>MT-ND6</i>        | 0.251                                 |
| <i>GUCY1B3</i>       | 0.251                                 |
| <i>USHBP1</i>        | 0.251                                 |
| <i>LBH</i>           | 0.252                                 |
| <i>PFKFB3</i>        | 0.252                                 |
| <i>TPP1</i>          | 0.252                                 |
| <i>FAM212A</i>       | 0.252                                 |
| <i>STAT4</i>         | 0.252                                 |
| <i>GPD1L</i>         | 0.252                                 |
| <i>ARHGAP9</i>       | 0.252                                 |
| <i>RYR2</i>          | 0.252                                 |
| <i>ODF3B</i>         | 0.253                                 |
| <i>HOXA-AS2</i>      | 0.253                                 |
| <i>PPM1F</i>         | 0.253                                 |
| <i>GPCPD1</i>        | 0.253                                 |
| <i>PIK3R1</i>        | 0.253                                 |
| <i>RPS20P35</i>      | 0.253                                 |
| <i>EFCAB1</i>        | 0.254                                 |
| <i>FYCO1</i>         | 0.254                                 |
| <i>HPCAL1</i>        | 0.255                                 |
| <i>RHOQ</i>          | 0.255                                 |
| <i>OLFML3</i>        | 0.255                                 |
| <i>CMTM7</i>         | 0.256                                 |
| <i>GCSHP4</i>        | 0.256                                 |
| <i>RP4-647J21.1</i>  | 0.256                                 |
| <i>PTK2B</i>         | 0.257                                 |
| <i>SEPTIN10</i>      | 0.257                                 |
| <i>RP11-318K15.2</i> | 0.257                                 |
| <i>CST3</i>          | 0.257                                 |
| <i>RNF180</i>        | 0.257                                 |
| <i>CNN1</i>          | 0.257                                 |
| <i>EPB41L2</i>       | 0.257                                 |
| <i>RIN2</i>          | 0.257                                 |
| <i>ARHGAP25</i>      | 0.257                                 |
| <i>TST</i>           | 0.257                                 |
| <i>MYO1C</i>         | 0.257                                 |
| <i>HYAL2</i>         | 0.258                                 |
| <i>MAFF</i>          | 0.258                                 |
| <i>BCRP3</i>         | 0.258                                 |
| <i>SAMSN1</i>        | 0.258                                 |
| <i>AC011513.4</i>    | 0.258                                 |
| <i>WI2-1896O14.1</i> | 0.258                                 |
| <i>REL</i>           | 0.258                                 |

| <b>Gene Name</b>     | <b>Fold change relative to normal</b> |
|----------------------|---------------------------------------|
| <i>CTD-3252C9.4</i>  | 0.258                                 |
| <i>AC093484.4</i>    | 0.259                                 |
| <i>LINC00963</i>     | 0.259                                 |
| <i>PMM1</i>          | 0.259                                 |
| <i>B2M</i>           | 0.260                                 |
| <i>RARRES1</i>       | 0.260                                 |
| <i>STXBP6</i>        | 0.260                                 |
| <i>UNC93B1</i>       | 0.260                                 |
| <i>SH3TC1</i>        | 0.260                                 |
| <i>APOL3</i>         | 0.260                                 |
| <i>RP11-385D13.1</i> | 0.260                                 |
| <i>SNORD89</i>       | 0.260                                 |
| <i>APLP2</i>         | 0.261                                 |
| <i>ST3GAL6</i>       | 0.261                                 |
| <i>MAFK</i>          | 0.261                                 |
| <i>TMEM232</i>       | 0.261                                 |
| <i>UPP1</i>          | 0.262                                 |
| <i>KIAA0513</i>      | 0.262                                 |
| <i>FLNA</i>          | 0.262                                 |
| <i>TRIM22</i>        | 0.263                                 |
| <i>DOCK11</i>        | 0.263                                 |
| <i>RP11-452N17.1</i> | 0.263                                 |
| <i>KCNAB2</i>        | 0.263                                 |
| <i>CTSA</i>          | 0.263                                 |
| <i>ITIH3</i>         | 0.263                                 |
| <i>RAB37</i>         | 0.263                                 |
| <i>PPAP2A</i>        | 0.263                                 |
| <i>PTGES</i>         | 0.264                                 |
| <i>CLDN16</i>        | 0.265                                 |
| <i>PCED1B</i>        | 0.265                                 |
| <i>MYC</i>           | 0.266                                 |
| <i>GLUL</i>          | 0.266                                 |
| <i>TRADD</i>         | 0.266                                 |
| <i>IL2RG</i>         | 0.266                                 |
| <i>SPRYD3</i>        | 0.266                                 |
| <i>C15orf26</i>      | 0.266                                 |
| <i>CD40</i>          | 0.266                                 |
| <i>KRT19</i>         | 0.266                                 |
| <i>KIAA1217</i>      | 0.267                                 |
| <i>USP25</i>         | 0.267                                 |
| <i>IL15</i>          | 0.267                                 |
| <i>SLC46A3</i>       | 0.267                                 |
| <i>PDGFRB</i>        | 0.267                                 |
| <i>IL32</i>          | 0.267                                 |
| <i>BCL9L</i>         | 0.267                                 |
| <i>ENTPD3</i>        | 0.267                                 |
| <i>MEF2C</i>         | 0.268                                 |

| <b>Gene Name</b>     | <b>Fold change relative to normal</b> |
|----------------------|---------------------------------------|
| <i>SOD2</i>          | 0.268                                 |
| <i>RP11-286E11.1</i> | 0.268                                 |
| <i>FZD5</i>          | 0.268                                 |
| <i>USP54</i>         | 0.268                                 |
| <i>CD300LB</i>       | 0.269                                 |
| <i>KIF16B</i>        | 0.269                                 |
| <i>RP3-416H24.1</i>  | 0.269                                 |
| <i>S100A16</i>       | 0.269                                 |
| <i>SEPP1</i>         | 0.269                                 |
| <i>PTP4A1P7</i>      | 0.270                                 |
| <i>CD247</i>         | 0.271                                 |
| <i>GALC</i>          | 0.271                                 |
| <i>LAMA5</i>         | 0.271                                 |
| <i>PHLDB2</i>        | 0.271                                 |
| <i>PON2</i>          | 0.271                                 |
| <i>BATF3</i>         | 0.271                                 |
| <i>SLC16A3</i>       | 0.272                                 |
| <i>ARID5A</i>        | 0.272                                 |
| <i>SERPINB6</i>      | 0.272                                 |
| <i>ARHGEF17</i>      | 0.272                                 |
| <i>CCDC78</i>        | 0.273                                 |
| <i>SPATA13</i>       | 0.273                                 |
| <i>CD59</i>          | 0.273                                 |
| <i>HIC1</i>          | 0.273                                 |
| <i>MARCH2</i>        | 0.273                                 |
| <i>PLA1A</i>         | 0.274                                 |
| <i>CCPG1</i>         | 0.274                                 |
| <i>LGMN</i>          | 0.274                                 |
| <i>HSBP1L1</i>       | 0.274                                 |
| <i>PLSCR4</i>        | 0.274                                 |
| <i>CHPT1</i>         | 0.275                                 |
| <i>EHBP1L1</i>       | 0.276                                 |
| <i>ADAP1</i>         | 0.276                                 |
| <i>VCL</i>           | 0.276                                 |
| <i>POLD4</i>         | 0.277                                 |
| <i>LAMA4</i>         | 0.277                                 |
| <i>CACNB4</i>        | 0.277                                 |
| <i>DTHD1</i>         | 0.277                                 |
| <i>CD48</i>          | 0.277                                 |
| <i>ATF7IP2</i>       | 0.278                                 |
| <i>FBXO2</i>         | 0.278                                 |
| <i>STAC3</i>         | 0.278                                 |
| <i>PLK2</i>          | 0.278                                 |
| <i>PDXK</i>          | 0.279                                 |
| <i>SAT1</i>          | 0.279                                 |
| <i>GPX1</i>          | 0.279                                 |
| <i>RP4-607J23.2</i>  | 0.279                                 |

| <b>Gene Name</b>    | <b>Fold change relative to normal</b> |
|---------------------|---------------------------------------|
| <i>ZBTB42</i>       | 0.279                                 |
| <i>RP11-665G4.1</i> | 0.280                                 |
| <i>ARL6IP5</i>      | 0.280                                 |
| <i>ZBTB47</i>       | 0.280                                 |
| <i>CIB1</i>         | 0.280                                 |
| <i>MCOLN1</i>       | 0.280                                 |
| <i>ICAM2</i>        | 0.281                                 |
| <i>ANXA4</i>        | 0.281                                 |
| <i>NOS3</i>         | 0.281                                 |
| <i>MXD4</i>         | 0.281                                 |
| <i>MYL12A</i>       | 0.281                                 |
| <i>SUCLG2</i>       | 0.282                                 |
| <i>IQSEC3</i>       | 0.282                                 |
| <i>TPT1P4</i>       | 0.282                                 |
| <i>PLCE1</i>        | 0.282                                 |
| <i>HSD17B11</i>     | 0.282                                 |
| <i>FAM101B</i>      | 0.282                                 |
| <i>PDGFB</i>        | 0.283                                 |
| <i>AK1</i>          | 0.283                                 |
| <i>RUNX1</i>        | 0.283                                 |
| <i>RAB27A</i>       | 0.283                                 |
| <i>SPRY1</i>        | 0.284                                 |
| <i>CD58</i>         | 0.284                                 |
| <i>CACHD1</i>       | 0.284                                 |
| <i>IRAK2</i>        | 0.285                                 |
| <i>ITPKB</i>        | 0.285                                 |
| <i>IFITM3</i>       | 0.286                                 |
| <i>GPR68</i>        | 0.287                                 |
| <i>DOK7</i>         | 0.287                                 |
| <i>FOSL2</i>        | 0.288                                 |
| <i>TXNDC11</i>      | 0.288                                 |
| <i>ITGB2-AS1</i>    | 0.289                                 |
| <i>CAST</i>         | 0.289                                 |
| <i>LINC00324</i>    | 0.289                                 |
| <i>SFXN3</i>        | 0.289                                 |
| <i>FAM13A</i>       | 0.289                                 |
| <i>MOB3C</i>        | 0.289                                 |
| <i>WDR11-AS1</i>    | 0.290                                 |
| <i>RETSAT</i>       | 0.290                                 |
| <i>AGR2</i>         | 0.290                                 |
| <i>FTH1P23</i>      | 0.290                                 |
| <i>NR1H3</i>        | 0.291                                 |
| <i>HEXB</i>         | 0.291                                 |
| <i>AGPAT2</i>       | 0.291                                 |
| <i>AC010733.5</i>   | 0.292                                 |
| <i>FTH1P10</i>      | 0.292                                 |
| <i>TAGAP</i>        | 0.292                                 |

| <b>Gene Name</b> | <b>Fold change relative to normal</b> |
|------------------|---------------------------------------|
| <i>AMT</i>       | 0.293                                 |
| <i>AXIN2</i>     | 0.293                                 |
| <i>TGFB2</i>     | 0.293                                 |
| <i>NCOA4</i>     | 0.293                                 |
| <i>ICOS</i>      | 0.294                                 |
| <i>UTRN</i>      | 0.294                                 |
| <i>LINC-PINT</i> | 0.294                                 |
| <i>C10orf11</i>  | 0.294                                 |
| <i>LURAP1L</i>   | 0.294                                 |
| <i>IL17RA</i>    | 0.294                                 |
| <i>STAT6</i>     | 0.294                                 |
| <i>TIMP2</i>     | 0.294                                 |
| <i>SH2B3</i>     | 0.294                                 |
| <i>ACTG2</i>     | 0.294                                 |
| <i>EHD4</i>      | 0.294                                 |
| <i>HSD17B4</i>   | 0.295                                 |
| <i>PRKCZ</i>     | 0.295                                 |
| <i>CD81</i>      | 0.296                                 |
| <i>TCF7L2</i>    | 0.296                                 |
| <i>TK2</i>       | 0.297                                 |
| <i>WBP1L</i>     | 0.297                                 |
| <i>FGD4</i>      | 0.297                                 |
| <i>TRIOBP</i>    | 0.297                                 |
| <i>IL17RE</i>    | 0.297                                 |
| <i>NAGLU</i>     | 0.297                                 |
| <i>FLI1</i>      | 0.298                                 |
| <i>EEF1A1P13</i> | 0.298                                 |
| <i>ATG7</i>      | 0.298                                 |
| <i>NR4A2</i>     | 0.298                                 |
| <i>RNPEPL1</i>   | 0.298                                 |
| <i>RAI2</i>      | 0.298                                 |
| <i>BCL3</i>      | 0.298                                 |
| <i>EDEM2</i>     | 0.298                                 |
| <i>BTG2</i>      | 0.299                                 |
| <i>RASL11A</i>   | 0.299                                 |
| <i>JADE2</i>     | 0.299                                 |
| <i>ABHD14B</i>   | 0.299                                 |
| <i>MARCH1</i>    | 0.300                                 |
| <i>UBA7</i>      | 0.300                                 |
| <i>TMEM173</i>   | 0.300                                 |
| <i>GLB1</i>      | 0.301                                 |
| <i>ACCS</i>      | 0.301                                 |
| <i>EPHX1</i>     | 0.302                                 |
| <i>NAMPT</i>     | 0.302                                 |
| <i>ARRDC4</i>    | 0.302                                 |
| <i>EOGT</i>      | 0.302                                 |
| <i>VAT1</i>      | 0.302                                 |



| <b>Gene Name</b>     | <b>Fold change relative to normal</b> |
|----------------------|---------------------------------------|
| <i>RASSF2</i>        | 0.303                                 |
| <i>ERAP1</i>         | 0.303                                 |
| <i>RP11-469M7.1</i>  | 0.303                                 |
| <i>TRIM8</i>         | 0.304                                 |
| <i>TXK</i>           | 0.304                                 |
| <i>SDC2</i>          | 0.304                                 |
| <i>FAM21A</i>        | 0.304                                 |
| <i>ZDHHC7</i>        | 0.304                                 |
| <i>LGALS1</i>        | 0.305                                 |
| <i>LRPAP1</i>        | 0.305                                 |
| <i>SLC23A1</i>       | 0.305                                 |
| <i>FTH1P2</i>        | 0.305                                 |
| <i>NHSL1</i>         | 0.305                                 |
| <i>NMRK1</i>         | 0.305                                 |
| <i>SHANK3</i>        | 0.305                                 |
| <i>GALM</i>          | 0.306                                 |
| <i>RP5-1148A21.3</i> | 0.306                                 |
| <i>C20orf194</i>     | 0.306                                 |
| <i>ERRFI1</i>        | 0.306                                 |
| <i>SNX22</i>         | 0.307                                 |
| <i>SLC22A4</i>       | 0.307                                 |
| <i>RP11-507E23.1</i> | 0.307                                 |
| <i>RNASET2</i>       | 0.308                                 |
| <i>AP5B1</i>         | 0.308                                 |
| <i>TMEM63B</i>       | 0.308                                 |
| <i>SPG20</i>         | 0.308                                 |
| <i>BAIAP2</i>        | 0.308                                 |
| <i>RP11-493K19.3</i> | 0.309                                 |
| <i>USP53</i>         | 0.309                                 |
| <i>TNFSF13B</i>      | 0.309                                 |
| <i>SQSTM1</i>        | 0.309                                 |
| <i>ARHGAP23</i>      | 0.310                                 |
| <i>CYB5A</i>         | 0.310                                 |
| <i>MAP3K7CL</i>      | 0.310                                 |
| <i>PPFIBP1</i>       | 0.310                                 |
| <i>TPT1</i>          | 0.310                                 |
| <i>SAT2</i>          | 0.311                                 |
| <i>DNAH1</i>         | 0.311                                 |
| <i>SNX24</i>         | 0.311                                 |
| <i>SMAD7</i>         | 0.312                                 |
| <i>HEXA</i>          | 0.312                                 |
| <i>TMEM2</i>         | 0.312                                 |
| <i>DNASE1L3</i>      | 0.312                                 |
| <i>SESN2</i>         | 0.312                                 |
| <i>TCIRG1</i>        | 0.313                                 |
| <i>BAG3</i>          | 0.313                                 |
| <i>PEAK1</i>         | 0.313                                 |

| <b>Gene Name</b>  | <b>Fold change relative to normal</b> |
|-------------------|---------------------------------------|
| <i>RAB11FIP5</i>  | 0.313                                 |
| <i>PHACTR1</i>    | 0.313                                 |
| <i>PHYKPL</i>     | 0.313                                 |
| <i>CTDSP1</i>     | 0.313                                 |
| <i>EPS8L1</i>     | 0.313                                 |
| <i>TGM1</i>       | 0.314                                 |
| <i>CCR2</i>       | 0.314                                 |
| <i>CCND3</i>      | 0.314                                 |
| <i>COL4A3BP</i>   | 0.314                                 |
| <i>IGFBP6</i>     | 0.314                                 |
| <i>SLC6A6</i>     | 0.314                                 |
| <i>DDX60L</i>     | 0.314                                 |
| <i>TOM1L2</i>     | 0.314                                 |
| <i>CRY2</i>       | 0.315                                 |
| <i>EEF1A1P5</i>   | 0.315                                 |
| <i>CFLAR</i>      | 0.315                                 |
| <i>UBL3</i>       | 0.315                                 |
| <i>YBX3</i>       | 0.316                                 |
| <i>CYBA</i>       | 0.316                                 |
| <i>SNX18</i>      | 0.316                                 |
| <i>CDS1</i>       | 0.316                                 |
| <i>JUN</i>        | 0.317                                 |
| <i>ST3GAL1</i>    | 0.318                                 |
| <i>CTBS</i>       | 0.319                                 |
| <i>CCDC88B</i>    | 0.319                                 |
| <i>CAPN2</i>      | 0.319                                 |
| <i>TAOK3</i>      | 0.319                                 |
| <i>METTL7A</i>    | 0.319                                 |
| <i>AC016712.2</i> | 0.319                                 |
| <i>MAST4</i>      | 0.320                                 |
| <i>RAB8B</i>      | 0.320                                 |
| <i>SPATS2L</i>    | 0.321                                 |
| <i>REEP5</i>      | 0.321                                 |
| <i>CYB5R3</i>     | 0.321                                 |
| <i>SNX30</i>      | 0.322                                 |
| <i>ARRB2</i>      | 0.322                                 |
| <i>MSMO1</i>      | 0.323                                 |
| <i>GRINA</i>      | 0.324                                 |
| <i>DHCR24</i>     | 0.324                                 |
| <i>DOCK9</i>      | 0.324                                 |
| <i>CD151</i>      | 0.324                                 |
| <i>NAB2</i>       | 0.325                                 |
| <i>FAM129B</i>    | 0.325                                 |
| <i>CYSTM1</i>     | 0.326                                 |
| <i>PAPLN</i>      | 0.326                                 |
| <i>NFKB1</i>      | 0.326                                 |
| <i>ADCY9</i>      | 0.326                                 |

| <b>Gene Name</b>    | <b>Fold change relative to normal</b> |
|---------------------|---------------------------------------|
| <i>RP5-115904.2</i> | 0.327                                 |
| <i>PRR29</i>        | 0.327                                 |
| <i>RARB</i>         | 0.327                                 |
| <i>SMCO3</i>        | 0.328                                 |
| <i>SEPT4</i>        | 0.328                                 |
| <i>MTMR14</i>       | 0.328                                 |
| <i>RNF130</i>       | 0.328                                 |
| <i>NEDD4L</i>       | 0.329                                 |
| <i>ITM2B</i>        | 0.329                                 |
| <i>C10orf32</i>     | 0.331                                 |
| <i>TAGLN</i>        | 0.331                                 |
| <i>MT-ND5</i>       | 0.331                                 |
| <i>MCL1</i>         | 0.332                                 |
| <i>ARAP1</i>        | 0.332                                 |
| <i>CYP4V2</i>       | 0.332                                 |
| <i>MID1IP1</i>      | 0.333                                 |
| <i>NEBL-AS1</i>     | 0.333                                 |
| <i>ASL</i>          | 0.334                                 |
| <i>SPSB2</i>        | 0.334                                 |
| <i>LXN</i>          | 0.335                                 |
| <i>NCOA7</i>        | 0.335                                 |
| <i>ATP6V0E1</i>     | 0.335                                 |
| <i>RP11-29G8.3</i>  | 0.335                                 |
| <i>ENTPD3-AS1</i>   | 0.336                                 |
| <i>SNX2</i>         | 0.336                                 |
| <i>PTPN6</i>        | 0.336                                 |
| <i>SSFA2</i>        | 0.337                                 |
| <i>LRRFIP1</i>      | 0.337                                 |
| <i>SIPA1</i>        | 0.337                                 |
| <i>IL5RA</i>        | 0.338                                 |
| <i>ALAS1</i>        | 0.338                                 |
| <i>ARSA</i>         | 0.338                                 |
| <i>MAP2K3</i>       | 0.338                                 |
| <i>OSTF1</i>        | 0.339                                 |
| <i>ERICH2</i>       | 0.339                                 |
| <i>STAT5A</i>       | 0.340                                 |
| <i>FBXW4</i>        | 0.340                                 |
| <i>MPST</i>         | 0.341                                 |
| <i>ELTD1</i>        | 0.342                                 |
| <i>PDE4B</i>        | 0.342                                 |
| <i>KIAA0930</i>     | 0.343                                 |
| <i>PIK3CD</i>       | 0.343                                 |
| <i>TNFSF10</i>      | 0.343                                 |
| <i>ABLIM1</i>       | 0.343                                 |
| <i>DOK1</i>         | 0.344                                 |
| <i>FOXO1</i>        | 0.344                                 |
| <i>PNRC1</i>        | 0.345                                 |

| <b>Gene Name</b> | <b>Fold change relative to normal</b> |
|------------------|---------------------------------------|
| <i>TPT1P9</i>    | 0.346                                 |
| <i>SNAP23</i>    | 0.346                                 |
| <i>CYTH1</i>     | 0.346                                 |
| <i>FAM65A</i>    | 0.346                                 |
| <i>GNAI2</i>     | 0.347                                 |
| <i>RHOG</i>      | 0.347                                 |
| <i>TOB2</i>      | 0.348                                 |
| <i>SCAMP2</i>    | 0.349                                 |
| <i>UBE2Q2P6</i>  | 0.349                                 |
| <i>DCUN1D3</i>   | 0.349                                 |
| <i>ANXA5</i>     | 0.349                                 |
| <i>SDCBP</i>     | 0.350                                 |
| <i>PLEKHB2</i>   | 0.350                                 |
| <i>IDUA</i>      | 0.351                                 |
| <i>TMEM87A</i>   | 0.351                                 |
| <i>RBKS</i>      | 0.351                                 |
| <i>HDAC7</i>     | 0.352                                 |
| <i>STK17A</i>    | 0.352                                 |
| <i>STXBP2</i>    | 0.352                                 |
| <i>RASSF5</i>    | 0.352                                 |
| <i>MMP24-AS1</i> | 0.353                                 |
| <i>NFIL3</i>     | 0.354                                 |
| <i>MKNK2</i>     | 0.355                                 |
| <i>OBFC1</i>     | 0.355                                 |
| <i>NFKB2</i>     | 0.356                                 |
| <i>CASP7</i>     | 0.356                                 |
| <i>LRP2BP</i>    | 0.356                                 |
| <i>TAX1BP3</i>   | 0.356                                 |
| <i>BLVRA</i>     | 0.357                                 |
| <i>RGS10</i>     | 0.358                                 |
| <i>MYO5C</i>     | 0.359                                 |
| <i>RECK</i>      | 0.359                                 |
| <i>EFCAB4A</i>   | 0.359                                 |
| <i>BRI3</i>      | 0.359                                 |
| <i>CD9</i>       | 0.360                                 |
| <i>TRIP10</i>    | 0.360                                 |
| <i>LITAF</i>     | 0.361                                 |
| <i>GLTSCR2</i>   | 0.361                                 |
| <i>SMARCD3</i>   | 0.361                                 |
| <i>TMEM43</i>    | 0.361                                 |
| <i>FNIP2</i>     | 0.361                                 |
| <i>CC2D2A</i>    | 0.362                                 |
| <i>TBC1D9</i>    | 0.363                                 |
| <i>LMCD1</i>     | 0.363                                 |
| <i>SFT2D1</i>    | 0.363                                 |
| <i>XPB1</i>      | 0.363                                 |
| <i>SHISA5</i>    | 0.363                                 |

| <b>Gene Name</b>     | <b>Fold change relative to normal</b> |
|----------------------|---------------------------------------|
| <i>RAPGEF2</i>       | 0.364                                 |
| <i>NEK5</i>          | 0.365                                 |
| <i>NR3C1</i>         | 0.365                                 |
| <i>EFR3A</i>         | 0.366                                 |
| <i>CDHR3</i>         | 0.366                                 |
| <i>TMEM120A</i>      | 0.366                                 |
| <i>SUSD3</i>         | 0.368                                 |
| <i>IGFBP7</i>        | 0.368                                 |
| <i>PIM3</i>          | 0.369                                 |
| <i>TBC1D22A</i>      | 0.370                                 |
| <i>WIPF1</i>         | 0.371                                 |
| <i>MT-ND3</i>        | 0.371                                 |
| <i>IMPDH1</i>        | 0.371                                 |
| <i>CAB39L</i>        | 0.371                                 |
| <i>ANKRD44</i>       | 0.373                                 |
| <i>SESN1</i>         | 0.373                                 |
| <i>DES1</i>          | 0.373                                 |
| <i>SP100</i>         | 0.374                                 |
| <i>OSTM1</i>         | 0.374                                 |
| <i>DUSP5</i>         | 0.375                                 |
| <i>ZBTB38</i>        | 0.375                                 |
| <i>PRNP</i>          | 0.377                                 |
| <i>CRIP1</i>         | 0.377                                 |
| <i>GGA2</i>          | 0.378                                 |
| <i>ERGIC1</i>        | 0.378                                 |
| <i>RBMS1</i>         | 0.379                                 |
| <i>CTD-3157E16.2</i> | 0.379                                 |
| <i>RPS27L</i>        | 0.380                                 |
| <i>ETS1</i>          | 0.380                                 |
| <i>ACSL4</i>         | 0.381                                 |
| <i>CD63</i>          | 0.381                                 |
| <i>ADD3</i>          | 0.381                                 |
| <i>FGF2</i>          | 0.382                                 |
| <i>SNX10</i>         | 0.382                                 |
| <i>TSPAN13</i>       | 0.383                                 |
| <i>TRIM16</i>        | 0.384                                 |
| <i>SLC25A37</i>      | 0.384                                 |
| <i>VASP</i>          | 0.385                                 |
| <i>B4GALT1</i>       | 0.386                                 |
| <i>SMIM14</i>        | 0.386                                 |
| <i>AC114498.1</i>    | 0.386                                 |
| <i>TES</i>           | 0.387                                 |
| <i>PRR13</i>         | 0.388                                 |
| <i>DNAJB12</i>       | 0.389                                 |
| <i>IQGAP1</i>        | 0.389                                 |
| <i>EBF1</i>          | 0.389                                 |
| <i>FAIM3</i>         | 0.390                                 |

| <b>Gene Name</b>     | <b>Fold change relative to normal</b> |
|----------------------|---------------------------------------|
| <i>SH3BGRL3</i>      | 0.391                                 |
| <i>IFIT5</i>         | 0.391                                 |
| <i>TNIP2</i>         | 0.391                                 |
| <i>CASP4</i>         | 0.391                                 |
| <i>GSTK1</i>         | 0.392                                 |
| <i>AKNA</i>          | 0.392                                 |
| <i>DUSP3</i>         | 0.393                                 |
| <i>MBNL1</i>         | 0.393                                 |
| <i>PAPSS1</i>        | 0.393                                 |
| <i>TPPP3</i>         | 0.395                                 |
| <i>PNKD</i>          | 0.397                                 |
| <i>PDLIM1</i>        | 0.397                                 |
| <i>NR1H2</i>         | 0.397                                 |
| <i>JUND</i>          | 0.398                                 |
| <i>MIR6723</i>       | 0.399                                 |
| <i>PDLIM5</i>        | 0.400                                 |
| <i>SACM1L</i>        | 0.401                                 |
| <i>NRBF2</i>         | 0.401                                 |
| <i>MED15</i>         | 0.402                                 |
| <i>PACSIN2</i>       | 0.404                                 |
| <i>SGPP1</i>         | 0.405                                 |
| <i>C12orf49</i>      | 0.407                                 |
| <i>SOCS1</i>         | 0.407                                 |
| <i>RAP1A</i>         | 0.409                                 |
| <i>SKI</i>           | 0.409                                 |
| <i>CCDC85B</i>       | 0.410                                 |
| <i>ISG20</i>         | 0.412                                 |
| <i>LAP3</i>          | 0.413                                 |
| <i>ARHGEF1</i>       | 0.413                                 |
| <i>SBDS</i>          | 0.413                                 |
| <i>ARRDC3</i>        | 0.414                                 |
| <i>TMSB4XP1</i>      | 0.416                                 |
| <i>ARPC2</i>         | 0.418                                 |
| <i>SWAP70</i>        | 0.418                                 |
| <i>EPB41L5</i>       | 0.418                                 |
| <i>CTD-2287O16.1</i> | 0.420                                 |
| <i>HIPK3</i>         | 0.420                                 |
| <i>AC022431.1</i>    | 0.420                                 |
| <i>SLC20A2</i>       | 0.421                                 |
| <i>YPEL5</i>         | 0.421                                 |
| <i>ELK3</i>          | 0.422                                 |
| <i>C4orf3</i>        | 0.423                                 |
| <i>PDCD4</i>         | 0.423                                 |
| <i>GSTO1</i>         | 0.424                                 |
| <i>SNX1</i>          | 0.425                                 |
| <i>ARL8B</i>         | 0.425                                 |
| <i>ISCU</i>          | 0.427                                 |

| <b>Gene Name</b> | <b>Fold change relative to normal</b> |
|------------------|---------------------------------------|
| <i>CLTB</i>      | 0.427                                 |
| <i>TNIP1</i>     | 0.428                                 |
| <i>EML3</i>      | 0.428                                 |
| <i>PTEN</i>      | 0.431                                 |
| <i>PUS10</i>     | 0.433                                 |
| <i>GLTP</i>      | 0.435                                 |
| <i>SYPL1</i>     | 0.436                                 |
| <i>CYFIP1</i>    | 0.438                                 |
| <i>TSC22D1</i>   | 0.438                                 |
| <i>EIF3L</i>     | 0.439                                 |
| <i>GLUD1</i>     | 0.440                                 |
| <i>LRRC23</i>    | 0.442                                 |
| <i>STX12</i>     | 0.443                                 |
| <i>PRDX5</i>     | 0.447                                 |
| <i>RPL13</i>     | 0.447                                 |
| <i>TRAM1</i>     | 0.447                                 |
| <i>TMEM159</i>   | 0.449                                 |
| <i>RPL13P12</i>  | 0.449                                 |
| <i>FBXL5</i>     | 0.451                                 |
| <i>RPL3</i>      | 0.453                                 |
| <i>ETF1</i>      | 0.454                                 |
| <i>CRLS1</i>     | 0.454                                 |
| <i>PTPN1</i>     | 0.456                                 |
| <i>ATP6V1E1</i>  | 0.457                                 |
| <i>DSTN</i>      | 0.459                                 |
| <i>NUMB</i>      | 0.460                                 |
| <i>EZR</i>       | 0.461                                 |
| <i>ANAPC16</i>   | 0.466                                 |
| <i>FBXO7</i>     | 0.467                                 |
| <i>WSB1</i>      | 0.472                                 |
| <i>RPL9</i>      | 0.473                                 |
| <i>RRM2B</i>     | 0.474                                 |
| <i>TMOD3</i>     | 0.475                                 |
| <i>ACTB</i>      | 0.476                                 |
| <i>RPL34</i>     | 0.477                                 |
| <i>RPS12</i>     | 0.483                                 |
| <i>EEF1A1</i>    | 0.487                                 |
| <i>CFL2</i>      | 0.491                                 |
| <i>RPS20</i>     | 0.503                                 |
| <i>RPS14</i>     | 0.507                                 |
| <i>RPL14</i>     | 0.515                                 |
| <i>PTP4A1</i>    | 0.518                                 |
| <i>RPS24</i>     | 0.521                                 |
| <i>RPS27A</i>    | 0.530                                 |
| <i>RPS25</i>     | 0.548                                 |

**Supplementary Table 5: List of Notch pathway genes enriched in GSEA**

| <b>Gene Name</b> | <b>Gene ID</b>  | <b>P-value</b> | <b>FC relative to normal</b> | <b>Expression in cancer</b> | <b>Expression in normal</b> | <b>FDR</b> |
|------------------|-----------------|----------------|------------------------------|-----------------------------|-----------------------------|------------|
| <i>ASCL1</i>     | ENSG00000139352 | 3.64E-10       | 46.951                       | 52381.507                   | 1114.694                    | 5.97E-08   |
| <i>DLL3</i>      | ENSG00000090932 | 8.05E-08       | 32.311                       | 3720.250                    | 114.170                     | 5.47E-06   |
| <i>DNER</i>      | ENSG00000187957 | 8.35E-05       | 29.658                       | 4387.691                    | 146.976                     | 1.84E-03   |
| <i>ONECUT1</i>   | ENSG00000169856 | 2.88E-04       | 26.944                       | 35.679                      | 0.361                       | 5.06E-03   |
| <i>RIPPLY2</i>   | ENSG00000203877 | 6.14E-05       | 21.680                       | 386.241                     | 16.862                      | 1.43E-03   |
| <i>HOXD3</i>     | ENSG00000128652 | 4.09E-03       | 6.186                        | 23.146                      | 2.903                       | 4.10E-02   |
| <i>HOXD3</i>     | ENSG00000278500 | 1.32E-02       | 4.291                        | 4.952                       | 0.387                       | 9.84E-02   |
| <i>MDK</i>       | ENSG00000110492 | 1.06E-06       | 6.130                        | 17448.795                   | 2845.605                    | 4.86E-05   |
| <i>NROB2</i>     | ENSG00000131910 | 4.55E-03       | 4.792                        | 1334.924                    | 277.785                     | 4.44E-02   |
| <i>MESP1</i>     | ENSG00000166823 | 1.13E-04       | 4.759                        | 476.771                     | 99.402                      | 2.34E-03   |
| <i>NEURL1B</i>   | ENSG00000214357 | 1.05E-05       | 4.011                        | 6762.319                    | 1685.068                    | 3.29E-04   |
| <i>DTX3</i>      | ENSG00000178498 | 1.03E-03       | 2.613                        | 3870.078                    | 1480.639                    | 1.41E-02   |
| <i>JAG2</i>      | ENSG00000184916 | 3.34E-03       | 2.570                        | 4545.401                    | 1767.954                    | 3.51E-02   |
| <i>CDKN1B</i>    | ENSG00000111276 | 2.96E-03       | 1.876                        | 11237.719                   | 5989.367                    | 3.20E-02   |
| <i>RPS27A</i>    | ENSG00000143947 | 3.84E-03       | 0.530                        | 28169.443                   | 53194.604                   | 3.91E-02   |
| <i>ANXA4</i>     | ENSG00000196975 | 1.06E-03       | 0.281                        | 3441.288                    | 12244.611                   | 1.43E-02   |
| <i>KRT19</i>     | ENSG00000171345 | 4.66E-06       | 0.266                        | 5675.278                    | 21299.344                   | 1.67E-04   |
| <i>MYC</i>       | ENSG00000136997 | 4.75E-03       | 0.266                        | 1587.685                    | 5982.610                    | 4.59E-02   |
| <i>NOTCH2</i>    | ENSG00000134250 | 7.90E-04       | 0.231                        | 2419.812                    | 10489.328                   | 1.14E-02   |
| <i>KCNA5</i>     | ENSG00000130037 | 3.89E-03       | 0.193                        | 16.980                      | 92.361                      | 3.95E-02   |
| <i>TP63</i>      | ENSG00000073282 | 2.95E-04       | 0.139                        | 116.928                     | 847.205                     | 5.16E-03   |
| <i>BMP2</i>      | ENSG00000125845 | 2.31E-06       | 0.128                        | 625.451                     | 4885.299                    | 9.32E-05   |
| <i>TGFB1</i>     | ENSG00000105329 | 1.14E-08       | 0.114                        | 960.771                     | 8447.230                    | 1.06E-06   |
| <i>DTX4</i>      | ENSG00000110042 | 2.12E-07       | 0.092                        | 606.659                     | 6579.331                    | 1.25E-05   |
| <i>CEBPA</i>     | ENSG00000245848 | 2.48E-04       | 0.084                        | 237.201                     | 2850.436                    | 4.48E-03   |
| <i>TBX2</i>      | ENSG00000121068 | 1.30E-10       | 0.080                        | 319.376                     | 4018.305                    | 2.55E-08   |
| <i>TMEM100</i>   | ENSG00000166292 | 2.68E-04       | 0.060                        | 475.436                     | 7962.384                    | 4.78E-03   |
| <i>TGFBR2</i>    | ENSG00000163513 | 4.05E-12       | 0.057                        | 2044.803                    | 36069.602                   | 1.47E-09   |
| <i>HNF1B</i>     | ENSG00000275410 | 8.81E-07       | 0.054                        | 10.757                      | 217.205                     | 4.16E-05   |
| <i>ANGPT4</i>    | ENSG00000101280 | 6.30E-11       | 0.032                        | 12.074                      | 411.815                     | 1.42E-08   |
| <i>CNTN6</i>     | ENSG00000134115 | 7.03E-09       | 0.031                        | 29.971                      | 1013.935                    | 7.11E-07   |



**Supplementary Table 6: List of genes from 4 pathways enriched in GSEA**

| Gene Name | P-value  | FC relative to normal | Expression in cancer | Expression in normal | FDR      | Pathway Name      |
|-----------|----------|-----------------------|----------------------|----------------------|----------|-------------------|
| CER1      | 2.43E-05 | 63.59812582           | 245.4751249          | 2.875509251          | 6.71E-04 | BMP               |
| DAND5     | 1.62E-04 | 22.27023927           | 103.6516828          | 3.699171911          | 3.15E-03 | BMP               |
| SOX11     | 6.92E-04 | 19.1967872            | 4754.919073          | 246.7455745          | 1.02E-02 | BMP               |
| VWC2L     | 3.88E-04 | 17.66795201           | 48.12948802          | 1.780712105          | 6.43E-03 | BMP               |
| FOXD1     | 1.14E-06 | 14.88642125           | 165.6873326          | 10.19727367          | 5.13E-05 | BMP               |
| RNF165    | 1.46E-04 | 6.398912653           | 1216.898998          | 189.329055           | 2.88E-03 | BMP               |
| ACVR2A    | 8.40E-04 | 2.811726766           | 2195.170946          | 780.0755199          | 1.19E-02 | BMP               |
| CTDSP2    | 4.75E-03 | 2.413768643           | 6533.891156          | 2706.339485          | 4.59E-02 | BMP               |
| UBE2O     | 3.60E-03 | 2.101327927           | 3802.820356          | 1809.198355          | 3.72E-02 | BMP               |
| SMAD4     | 5.28E-03 | 1.962241921           | 9544.92196           | 4863.803804          | 4.96E-02 | BMP               |
| TRIM33    | 5.20E-03 | 1.87338004            | 6752.454372          | 3603.956937          | 4.91E-02 | BMP               |
| SKI       | 4.17E-03 | 0.408880836           | 2914.365452          | 7129.110288          | 4.15E-02 | BMP               |
| SMAD7     | 1.85E-03 | 0.311593115           | 1079.763007          | 3467.507336          | 2.23E-02 | BMP               |
| SPG20     | 4.20E-04 | 0.307679151           | 1749.649315          | 5688.853568          | 6.85E-03 | BMP               |
| ITGA3     | 6.62E-06 | 0.239882717           | 4792.315481          | 19980.91259          | 2.25E-04 | BMP               |
| BMPER     | 1.98E-03 | 0.192536381           | 94.98074748          | 497.5070711          | 2.35E-02 | BMP               |
| SMAD6     | 7.90E-06 | 0.12755741            | 244.9537311          | 1927.180666          | 2.60E-04 | BMP               |
| ENG       | 7.56E-09 | 0.12153824            | 1301.794102          | 10718.21154          | 7.55E-07 | BMP               |
| C10orf54  | 1.41E-09 | 0.106184152           | 785.945086           | 7410.135034          | 1.82E-07 | BMP               |
| CYR61     | 5.81E-08 | 0.093959076           | 2452.86674           | 26115.33544          | 4.18E-06 | BMP               |
| FSTL3     | 1.50E-07 | 0.092506673           | 537.6995642          | 5822.358968          | 9.35E-06 | BMP               |
| BMP4      | 1.55E-06 | 0.092096173           | 74.86617106          | 822.7711615          | 6.65E-05 | BMP               |
| ACVRL1    | 2.26E-08 | 0.089740073           | 723.2839672          | 8069.909028          | 1.86E-06 | BMP               |
| GREM2     | 4.62E-07 | 0.081567049           | 13.80578629          | 180.5167574          | 2.42E-05 | BMP               |
| SOSTDC1   | 1.15E-03 | 0.074859534           | 75.09637506          | 1015.522161          | 1.52E-02 | BMP               |
| DKK1      | 1.03E-07 | 0.074398197           | 10.50903103          | 153.6950263          | 6.78E-06 | BMP               |
| CHRD1     | 5.62E-09 | 0.072361521           | 255.5510287          | 3544.406805          | 5.93E-07 | BMP               |
| GATA6     | 3.86E-12 | 0.055390683           | 150.4598025          | 2733.391297          | 1.41E-09 | BMP               |
| CAV1      | 2.49E-14 | 0.028013781           | 1790.150817          | 63937.20274          | 2.40E-11 | BMP               |
| ATP2B3    | 4.24E-05 | 88.48315779           | 1886.82196           | 20.33538187          | 1.06E-03 | Calcium signaling |
| ADCY2     | 4.53E-06 | 49.25120083           | 3977.901353          | 79.7879054           | 1.63E-04 | Calcium signaling |
| TACR3     | 6.69E-05 | 48.19854992           | 344.0985651          | 6.159936673          | 1.54E-03 | Calcium signaling |
| CACNA1E   | 1.52E-08 | 45.04869609           | 1463.196723          | 31.50253282          | 1.35E-06 | Calcium signaling |
| PRKCG     | 1.54E-04 | 34.52551166           | 217.9491251          | 5.341661993          | 3.02E-03 | Calcium signaling |

| Gene Name | P-value  | FC relative to normal | Expression in cancer | Expression in normal | FDR      | Pathway Name      |
|-----------|----------|-----------------------|----------------------|----------------------|----------|-------------------|
| GRIN2C    | 5.49E-06 | 31.4288865            | 2868.582127          | 90.30397054          | 1.92E-04 | Calcium signaling |
| CAMK2B    | 1.35E-06 | 28.7765234            | 4862.31382           | 168.0028275          | 5.91E-05 | Calcium signaling |
| CACNA1A   | 5.36E-07 | 25.31665836           | 18718.79936          | 738.4261555          | 2.75E-05 | Calcium signaling |
| AVPR1B    | 1.42E-06 | 16.27624179           | 36.49483494          | 1.303654334          | 6.14E-05 | Calcium signaling |
| CCKBR     | 2.17E-04 | 16.24010675           | 262.4584671          | 15.22270538          | 4.02E-03 | Calcium signaling |
| ADCY1     | 1.33E-10 | 15.56470948           | 6555.77866           | 420.2593026          | 2.58E-08 | Calcium signaling |
| CACNA1B   | 1.25E-04 | 14.31484136           | 2330.635069          | 161.8823547          | 2.54E-03 | Calcium signaling |
| GRM5      | 2.05E-04 | 13.84816353           | 20.85409833          | 0.578122491          | 3.83E-03 | Calcium signaling |
| SLC8A2    | 2.35E-04 | 13.2897702            | 215.4779276          | 15.28906477          | 4.29E-03 | Calcium signaling |
| ATP2B2    | 3.10E-04 | 12.4825988            | 218.7251819          | 16.60251895          | 5.36E-03 | Calcium signaling |
| CACNA1G   | 7.01E-04 | 10.20324002           | 341.3202919          | 32.55015575          | 1.03E-02 | Calcium signaling |
| MYLK2     | 2.94E-03 | 7.513037678           | 113.1414351          | 14.19244812          | 3.19E-02 | Calcium signaling |
| CHRM5     | 9.01E-04 | 6.113588908           | 62.29108902          | 9.352526148          | 1.26E-02 | Calcium signaling |
| HTR6      | 4.05E-03 | 4.275786626           | 17.93552147          | 3.428546869          | 4.07E-02 | Calcium signaling |
| PLCB1     | 5.75E-05 | 4.080241973           | 3451.020423          | 845.0332612          | 1.36E-03 | Calcium signaling |
| PLCB4     | 2.36E-03 | 3.284126522           | 2993.590456          | 910.8377248          | 2.69E-02 | Calcium signaling |
| PHKA1     | 3.28E-04 | 2.622452374           | 1684.97018           | 641.8983025          | 5.62E-03 | Calcium signaling |
| VDAC3     | 3.28E-03 | 1.951512874           | 8988.52414           | 4605.438553          | 3.47E-02 | Calcium signaling |
| ADCY9     | 3.75E-03 | 0.326094091           | 1515.653839          | 4649.970011          | 3.84E-02 | Calcium signaling |
| ITPKB     | 8.45E-04 | 0.285264487           | 1255.889974          | 4405.05133           | 1.20E-02 | Calcium signaling |
| PLCE1     | 1.55E-03 | 0.28199756            | 532.1449996          | 1889.601465          | 1.93E-02 | Calcium signaling |
| NOS3      | 7.91E-04 | 0.281163422           | 116.2067425          | 415.863408           | 1.14E-02 | Calcium signaling |
| PDGFRB    | 3.46E-03 | 0.267184114           | 1567.228511          | 5868.467636          | 3.61E-02 | Calcium signaling |
| PTK2B     | 1.48E-05 | 0.256548502           | 1893.11674           | 7382.074651          | 4.42E-04 | Calcium signaling |
| RYR2      | 3.71E-03 | 0.252452596           | 142.6686407          | 568.091557           | 3.81E-02 | Calcium signaling |
| MYLK      | 1.47E-04 | 0.242869953           | 2504.970921          | 10317.15955          | 2.89E-03 | Calcium signaling |
| CYSLTR1   | 5.13E-03 | 0.236807884           | 228.3488493          | 967.5017473          | 4.86E-02 | Calcium signaling |
| ERBB2     | 1.70E-07 | 0.175307804           | 1478.896253          | 8440.702077          | 1.04E-05 | Calcium signaling |
| PLCD1     | 3.10E-06 | 0.171893018           | 237.1138877          | 1384.24467           | 1.18E-04 | Calcium signaling |
| P2RX7     | 2.86E-04 | 0.169651456           | 317.9699405          | 1879.148559          | 5.03E-03 | Calcium signaling |
| EDNRA     | 4.40E-05 | 0.151501404           | 296.7559273          | 1964.367441          | 1.09E-03 | Calcium signaling |
| PLCB2     | 6.67E-06 | 0.146826443           | 697.9084062          | 4759.098997          | 2.26E-04 | Calcium signaling |
| PLCD3     | 2.68E-05 | 0.143413198           | 166.3047334          | 1165.592305          | 7.25E-04 | Calcium signaling |
| ADCY4     | 5.82E-06 | 0.138862546           | 159.2100246          | 1152.731005          | 2.01E-04 | Calcium signaling |
| P2RX2     | 5.43E-04 | 0.136138147           | 8.850588404          | 71.35729726          | 8.39E-03 | Calcium signaling |
| ITPR1     | 1.64E-09 | 0.132984195           | 573.8332887          | 4321.568463          | 2.04E-07 | Calcium signaling |
| ADCY7     | 7.86E-05 | 0.102552507           | 251.3862942          | 2460.044604          | 1.75E-03 | Calcium signaling |

| Gene Name | P-value  | FC relative to normal | Expression in cancer | Expression in normal | FDR      | Pathway Name      |
|-----------|----------|-----------------------|----------------------|----------------------|----------|-------------------|
| CHP2      | 3.16E-03 | 0.098109029           | 1.63919136           | 25.90059612          | 3.37E-02 | Calcium signaling |
| BST1      | 1.76E-06 | 0.094032416           | 125.4151298          | 1343.378191          | 7.39E-05 | Calcium signaling |
| P2RX1     | 5.90E-06 | 0.086699975           | 55.0601569           | 645.5994596          | 2.04E-04 | Calcium signaling |
| AGTR1     | 1.36E-03 | 0.07722643            | 44.4762131           | 587.868514           | 1.74E-02 | Calcium signaling |
| ADCY8     | 1.87E-05 | 0.07432983            | 12.74810857          | 183.9608498          | 5.38E-04 | Calcium signaling |
| PTAFR     | 4.45E-08 | 0.070121139           | 507.1372672          | 7245.563234          | 3.29E-06 | Calcium signaling |
| PDE1B     | 7.78E-08 | 0.06907475            | 72.72806923          | 1066.36643           | 5.31E-06 | Calcium signaling |
| ADRB1     | 3.35E-06 | 0.065750018           | 97.69029337          | 1499.992653          | 1.26E-04 | Calcium signaling |
| EDNRB     | 2.21E-10 | 0.047159822           | 497.4197741          | 10567.73745          | 3.90E-08 | Calcium signaling |
| ADRA1A    | 1.44E-04 | 0.039706627           | 4.530461314          | 138.2830814          | 2.85E-03 | Calcium signaling |
| TNNC1     | 1.06E-11 | 0.023613888           | 108.7571655          | 4646.992055          | 3.31E-09 | Calcium signaling |
| ADRB2     | 2.58E-15 | 0.021057942           | 63.66013541          | 3069.581947          | 3.82E-12 | Calcium signaling |
| OR51E1    | 2.50E-06 | 711.6332197           | 3689.053809          | 4.18533102           | 9.91E-05 | GPCR              |
| CALCA     | 5.17E-08 | 229.0152202           | 6783.963002          | 28.6266903           | 3.77E-06 | GPCR              |
| GABRG3    | 1.83E-05 | 170.6492226           | 693.0152637          | 3.066911369          | 5.30E-04 | GPCR              |
| BRS3      | 4.52E-06 | 108.0217973           | 125.1348097          | 0.167679236          | 1.63E-04 | GPCR              |
| GABRG2    | 4.95E-04 | 69.28928869           | 68.28928869          | 0                    | 7.81E-03 | GPCR              |
| GRIK3     | 3.31E-05 | 69.10508064           | 6196.398153          | 88.68078897          | 8.64E-04 | GPCR              |
| ADCY2     | 4.53E-06 | 49.25120083           | 3977.901353          | 79.7879054           | 1.63E-04 | GPCR              |
| TACR3     | 6.69E-05 | 48.19854992           | 344.0985651          | 6.159936673          | 1.54E-03 | GPCR              |
| GRP       | 2.43E-06 | 45.58272122           | 57450.96108          | 1259.389015          | 9.66E-05 | GPCR              |
| CHGA      | 6.13E-07 | 43.30900625           | 794.5530103          | 17.369228            | 3.07E-05 | GPCR              |
| SORCS3    | 1.88E-03 | 42.70274275           | 91.10761109          | 1.156948363          | 2.26E-02 | GPCR              |
| PTH2      | 6.29E-05 | 42.39289966           | 41.39289966          | 0                    | 1.46E-03 | GPCR              |
| GNG8      | 2.94E-03 | 37.77048715           | 614.4630874          | 15.29481465          | 3.19E-02 | GPCR              |
| TMEM145   | 7.16E-07 | 37.75653705           | 2096.442185          | 54.55176265          | 3.51E-05 | GPCR              |
| OPRD1     | 2.62E-04 | 35.69142893           | 128.1711461          | 2.619108285          | 4.70E-03 | GPCR              |
| KCNK2     | 1.12E-03 | 35.26482113           | 451.1890469          | 11.82266668          | 1.50E-02 | GPCR              |
| GPR6      | 1.94E-09 | 34.54562614           | 139.935248           | 3.079684283          | 2.38E-07 | GPCR              |
| HTR1E     | 2.87E-03 | 32.15388368           | 111.0523842          | 2.484878695          | 3.13E-02 | GPCR              |
| GNG4      | 2.57E-09 | 31.95374889           | 22053.53578          | 689.2018242          | 3.03E-07 | GPCR              |
| GNG13     | 4.04E-04 | 30.27736041           | 55.0927795           | 0.852631099          | 6.64E-03 | GPCR              |
| GABBR2    | 6.08E-05 | 29.98677811           | 961.165294           | 31.08631785          | 1.43E-03 | GPCR              |
| SSTR2     | 1.74E-05 | 29.48916593           | 2061.029585          | 68.9249884           | 5.07E-04 | GPCR              |
| DRD2      | 8.97E-08 | 29.45011355           | 1670.706103          | 55.76399515          | 6.01E-06 | GPCR              |
| ATRNL1    | 5.54E-04 | 29.35589029           | 632.0192374          | 20.56361913          | 8.52E-03 | GPCR              |
| TAAR1     | 3.33E-03 | 26.30907184           | 213.8238158          | 7.165389382          | 3.51E-02 | GPCR              |

| Gene Name | P-value  | FC relative to normal | Expression in cancer | Expression in normal | FDR      | Pathway Name |
|-----------|----------|-----------------------|----------------------|----------------------|----------|--------------|
| RGS7      | 2.39E-07 | 26.20801139           | 736.1335603          | 27.12626831          | 1.38E-05 | GPCR         |
| CACNA1A   | 5.36E-07 | 25.31665836           | 18718.79936          | 738.4261555          | 2.75E-05 | GPCR         |
| GHRH      | 2.20E-03 | 25.30988857           | 1831.406573          | 71.39884             | 2.55E-02 | GPCR         |
| SUCNR1    | 2.24E-04 | 24.27737334           | 14957.10695          | 615.1336624          | 4.13E-03 | GPCR         |
| DGKB      | 2.74E-05 | 23.85254444           | 1227.913917          | 50.52129241          | 7.38E-04 | GPCR         |
| CALY      | 1.13E-03 | 23.77278384           | 246.2843432          | 9.401993506          | 1.50E-02 | GPCR         |
| GABRR1    | 3.41E-04 | 23.14226193           | 102.3846838          | 3.467354319          | 5.81E-03 | GPCR         |
| PRLHR     | 2.87E-03 | 23.13996384           | 46.62286215          | 1.058035288          | 3.13E-02 | GPCR         |
| PENK      | 1.06E-04 | 22.82017322           | 2793.760114          | 121.4688388          | 2.22E-03 | GPCR         |
| NPPA      | 7.14E-06 | 22.2380525            | 691.291468           | 30.13093955          | 2.39E-04 | GPCR         |
| GRM4      | 3.84E-06 | 21.14186168           | 1035.389741          | 48.02074174          | 1.42E-04 | GPCR         |
| ENTPD2    | 2.45E-05 | 20.93010894           | 1485.32739           | 70.01383915          | 6.74E-04 | GPCR         |
| GPR144    | 9.87E-06 | 19.95137976           | 87.37020096          | 3.429277675          | 3.13E-04 | GPCR         |
| GRM2      | 8.96E-07 | 19.49790241           | 620.2748492          | 30.8636762           | 4.22E-05 | GPCR         |
| BAI2      | 4.08E-07 | 18.68223462           | 3469.838436          | 184.782831           | 2.17E-05 | GPCR         |
| GPR139    | 1.99E-03 | 18.60076829           | 17.60076829          | 0                    | 2.35E-02 | GPCR         |
| ADCYAP1   | 9.86E-05 | 18.48414372           | 3958.682879          | 213.22052            | 2.09E-03 | GPCR         |
| NXPH4     | 2.07E-06 | 18.28273731           | 2659.577056          | 144.5239995          | 8.47E-05 | GPCR         |
| PROKR1    | 3.97E-03 | 17.46281696           | 115.8276887          | 5.690082647          | 4.01E-02 | GPCR         |
| TSHR      | 1.80E-03 | 17.2198513            | 435.1092617          | 24.32595979          | 2.18E-02 | GPCR         |
| GNGT1     | 1.47E-03 | 16.78703429           | 157.8445103          | 8.462333105          | 1.85E-02 | GPCR         |
| MTNR1B    | 6.06E-04 | 16.59779283           | 25.19335017          | 0.578122491          | 9.17E-03 | GPCR         |
| GPR158    | 3.18E-05 | 16.42598739           | 624.0676906          | 37.05358397          | 8.36E-04 | GPCR         |
| AVPR1B    | 1.42E-06 | 16.27624179           | 36.49483494          | 1.303654334          | 6.14E-05 | GPCR         |
| CCKBR     | 2.17E-04 | 16.24010675           | 262.4584671          | 15.22270538          | 4.02E-03 | GPCR         |
| CENPI     | 1.70E-13 | 15.88355388           | 1467.793091          | 91.47257276          | 1.07E-10 | GPCR         |
| ADCY1     | 1.33E-10 | 15.56470948           | 6555.77866           | 420.2593026          | 2.58E-08 | GPCR         |
| OR51E2    | 2.40E-03 | 15.51186049           | 25.94273255          | 0.736911737          | 2.72E-02 | GPCR         |
| APLP1     | 6.45E-17 | 15.31645822           | 5537.082685          | 360.5772396          | 2.02E-13 | GPCR         |
| GRM8      | 2.19E-04 | 14.53420597           | 1069.856582          | 72.6783684           | 4.06E-03 | GPCR         |
| CHRM4     | 1.40E-06 | 14.31998943           | 1066.968353          | 73.57885069          | 6.08E-05 | GPCR         |
| GRM5      | 2.05E-04 | 13.84816353           | 20.85409833          | 0.578122491          | 3.83E-03 | GPCR         |
| CELSR3    | 4.97E-10 | 13.78528819           | 4882.936799          | 353.2861586          | 7.70E-08 | GPCR         |
| GNAO1     | 3.77E-09 | 13.33402434           | 4436.961868          | 331.829891           | 4.26E-07 | GPCR         |
| FZD9      | 3.41E-06 | 13.21699065           | 1650.341281          | 123.9407921          | 1.28E-04 | GPCR         |
| NMU       | 4.67E-05 | 13.19619084           | 1021.389136          | 76.4760799           | 1.14E-03 | GPCR         |
| CCL25     | 5.06E-03 | 12.89260751           | 55.60985476          | 3.390877074          | 4.81E-02 | GPCR         |

| Gene Name | P-value  | FC relative to normal | Expression in cancer | Expression in normal | FDR      | Pathway Name |
|-----------|----------|-----------------------|----------------------|----------------------|----------|--------------|
| SCG5      | 2.01E-05 | 12.34042787           | 29.35671516          | 1.459940244          | 5.72E-04 | GPCR         |
| ZACN      | 5.21E-03 | 12.18374925           | 152.2773419          | 11.5804741           | 4.91E-02 | GPCR         |
| GRK1      | 4.22E-05 | 11.98359683           | 70.87789107          | 4.998023137          | 1.06E-03 | GPCR         |
| OR2B6     | 3.80E-05 | 11.53627388           | 36.44640191          | 2.24597026           | 9.71E-04 | GPCR         |
| GPR142    | 1.38E-06 | 11.35681305           | 54.11686535          | 3.853198262          | 6.02E-05 | GPCR         |
| GPR62     | 2.35E-05 | 11.07301628           | 52.93312019          | 3.870680114          | 6.53E-04 | GPCR         |
| OR2W6P    | 1.90E-04 | 10.97108683           | 9.971086835          | 0                    | 3.59E-03 | GPCR         |
| GABRA3    | 8.56E-04 | 10.79247616           | 73.24029926          | 5.87889398           | 1.21E-02 | GPCR         |
| GPR19     | 5.27E-05 | 10.46257386           | 613.860875           | 57.76764968          | 1.26E-03 | GPCR         |
| GPR149    | 1.05E-03 | 10.44950739           | 11.47315034          | 0.193659172          | 1.43E-02 | GPCR         |
| GAP43     | 3.12E-03 | 10.411848             | 230.2961198          | 21.21470384          | 3.34E-02 | GPCR         |
| CDK5R1    | 3.95E-06 | 10.31356696           | 3354.502097          | 324.3483601          | 1.45E-04 | GPCR         |
| LGR4      | 7.49E-09 | 9.117346579           | 7688.772347          | 842.4221821          | 7.50E-07 | GPCR         |
| BAI1      | 3.03E-04 | 8.647167094           | 974.5701991          | 111.8196308          | 5.27E-03 | GPCR         |
| HTR3E     | 4.70E-03 | 8.637291207           | 10.65683114          | 0.349593392          | 4.55E-02 | GPCR         |
| DGKI      | 1.29E-04 | 8.472715039           | 143.9244771          | 16.10484496          | 2.61E-03 | GPCR         |
| GPR173    | 2.93E-08 | 8.420663415           | 1507.897862          | 178.1899032          | 2.35E-06 | GPCR         |
| TAC3      | 7.68E-04 | 8.10810137            | 54.27513361          | 5.817272144          | 1.11E-02 | GPCR         |
| GNAZ      | 5.45E-07 | 8.094189242           | 1943.085012          | 239.1827971          | 2.78E-05 | GPCR         |
| HTR1D     | 5.09E-03 | 7.798264142           | 76.50903028          | 8.939267107          | 4.84E-02 | GPCR         |
| GAL       | 4.66E-03 | 7.581370772           | 75.81451413          | 9.132008636          | 4.52E-02 | GPCR         |
| GPR37L1   | 4.30E-03 | 7.430433697           | 71.08278941          | 8.701020472          | 4.25E-02 | GPCR         |
| PCSK1N    | 2.18E-03 | 6.828050969           | 4274.688985          | 625.1946498          | 2.53E-02 | GPCR         |
| OR1J1     | 4.11E-03 | 6.230121405           | 7.647543872          | 0.388021727          | 4.11E-02 | GPCR         |
| CHRM5     | 9.01E-04 | 6.113588908           | 62.29108902          | 9.352526148          | 1.26E-02 | GPCR         |
| OR13A1    | 1.20E-03 | 6.013866636           | 5.013866636          | 0                    | 1.58E-02 | GPCR         |
| CRHR2     | 8.40E-04 | 5.903483664           | 97.1416411           | 15.62436058          | 1.19E-02 | GPCR         |
| GPR61     | 1.66E-03 | 5.742880426           | 52.80112437          | 8.368317007          | 2.04E-02 | GPCR         |
| FZD3      | 9.48E-07 | 5.567284651           | 2894.657354          | 519.1202265          | 4.40E-05 | GPCR         |
| GPRC5B    | 5.05E-04 | 5.463753799           | 4975.696895          | 909.8567255          | 7.93E-03 | GPCR         |
| CPE       | 7.16E-06 | 5.341826908           | 29060.35666          | 5439.340384          | 2.40E-04 | GPCR         |
| GPSM2     | 1.07E-07 | 5.298408349           | 4111.462845          | 775.1694786          | 7.05E-06 | GPCR         |
| TAS2R38   | 5.21E-03 | 5.215921828           | 8.256366248          | 0.77463669           | 4.91E-02 | GPCR         |
| GPR63     | 2.17E-03 | 4.830263767           | 259.0556294          | 52.83880507          | 2.52E-02 | GPCR         |
| CELSR2    | 1.66E-07 | 4.772849405           | 6233.699397          | 1305.284541          | 1.02E-05 | GPCR         |
| GLP1R     | 1.68E-03 | 4.728882258           | 69.63566645          | 13.93707447          | 2.06E-02 | GPCR         |
| ADCY5     | 3.43E-05 | 4.728219703           | 1585.701116          | 334.5810888          | 8.92E-04 | GPCR         |

| Gene Name | P-value  | FC relative to normal | Expression in cancer | Expression in normal | FDR      | Pathway Name |
|-----------|----------|-----------------------|----------------------|----------------------|----------|--------------|
| POMC      | 1.34E-03 | 4.315204783           | 391.0959036          | 89.86379983          | 1.73E-02 | GPCR         |
| HTR6      | 4.05E-03 | 4.275786626           | 17.93552147          | 3.428546869          | 4.07E-02 | GPCR         |
| PLCB1     | 5.75E-05 | 4.080241973           | 3451.020423          | 845.0332612          | 1.36E-03 | GPCR         |
| GPR180    | 4.78E-04 | 3.040659268           | 3646.769524          | 1198.664021          | 7.60E-03 | GPCR         |
| INSR      | 1.20E-04 | 2.989932709           | 10505.6718           | 3513.016141          | 2.46E-03 | GPCR         |
| GPR161    | 2.23E-03 | 2.815386213           | 2780.120165          | 986.8290063          | 2.57E-02 | GPCR         |
| XPR1      | 1.20E-03 | 2.651384853           | 8189.522283          | 3088.14878           | 1.57E-02 | GPCR         |
| LPHN1     | 6.08E-04 | 2.587376667           | 6114.213804          | 2362.480309          | 9.19E-03 | GPCR         |
| GSK3B     | 1.86E-03 | 2.101031884           | 9220.488597          | 4388.028394          | 2.24E-02 | GPCR         |
| SIGMAR1   | 4.45E-03 | 1.915994641           | 4696.996297          | 2450.988224          | 4.37E-02 | GPCR         |
| EZR       | 6.72E-04 | 0.461082981           | 17993.38626          | 39025.35104          | 9.95E-03 | GPCR         |
| RAPGEF2   | 2.63E-03 | 0.364485275           | 1827.828016          | 5016.563514          | 2.93E-02 | GPCR         |
| RGS10     | 4.76E-03 | 0.358164849           | 655.3916918          | 1831.652463          | 4.59E-02 | GPCR         |
| GNAI2     | 1.69E-04 | 0.346710603           | 10982.63363          | 31678.54352          | 3.25E-03 | GPCR         |
| ELTD1     | 5.11E-03 | 0.341657063           | 523.6567962          | 1534.624031          | 4.85E-02 | GPCR         |
| PTPN6     | 2.96E-04 | 0.336038603           | 3110.360638          | 9257.938139          | 5.18E-03 | GPCR         |
| ADCY9     | 3.75E-03 | 0.326094091           | 1515.653839          | 4649.970011          | 3.84E-02 | GPCR         |
| ARRB2     | 1.13E-03 | 0.322314411           | 3612.975507          | 11211.5781           | 1.51E-02 | GPCR         |
| CCR2      | 3.21E-03 | 0.313660147           | 105.84957            | 339.6539558          | 3.41E-02 | GPCR         |
| GPR68     | 2.96E-03 | 0.286536012           | 180.7415567          | 633.2712574          | 3.20E-02 | GPCR         |
| PLCE1     | 1.55E-03 | 0.28199756            | 532.1449996          | 1889.601465          | 1.93E-02 | GPCR         |
| CACNB4    | 2.66E-03 | 0.277385296           | 258.962507           | 936.1892111          | 2.96E-02 | GPCR         |
| FZD5      | 1.53E-03 | 0.268460755           | 1184.425217          | 4414.636903          | 1.92E-02 | GPCR         |
| PDGFRB    | 3.46E-03 | 0.267184114           | 1567.228511          | 5868.467636          | 3.61E-02 | GPCR         |
| PPAP2A    | 7.28E-04 | 0.263373686           | 423.9666268          | 1612.550057          | 1.06E-02 | GPCR         |
| FLNA      | 7.74E-04 | 0.261882208           | 20396.33912          | 77886.45678          | 1.12E-02 | GPCR         |
| APLP2     | 2.66E-05 | 0.260731784           | 22662.86823          | 86923.07147          | 7.21E-04 | GPCR         |
| ACTN2     | 4.86E-03 | 0.24561065            | 42.38229671          | 175.6303564          | 4.66E-02 | GPCR         |
| RGS19     | 1.71E-05 | 0.241135346           | 606.3391404          | 2517.664937          | 5.00E-04 | GPCR         |
| PIK3CG    | 3.03E-03 | 0.239627683           | 248.4117623          | 1039.830338          | 3.26E-02 | GPCR         |
| CYSLTR1   | 5.13E-03 | 0.236807884           | 228.3488493          | 967.5017473          | 4.86E-02 | GPCR         |
| P2RY14    | 1.25E-04 | 0.220932878           | 94.95557034          | 433.3200126          | 2.54E-03 | GPCR         |
| GPR4      | 2.88E-03 | 0.218431406           | 139.2174637          | 640.9290448          | 3.14E-02 | GPCR         |
| CELSR1    | 6.19E-04 | 0.213715622           | 1819.444915          | 8517.071329          | 9.31E-03 | GPCR         |
| F2RL3     | 2.66E-03 | 0.211622216           | 165.4805527          | 785.687502           | 2.96E-02 | GPCR         |
| LPAR6     | 5.73E-05 | 0.210692634           | 428.4854267          | 2037.445384          | 1.35E-03 | GPCR         |
| GPR157    | 8.70E-05 | 0.208015478           | 258.9437035          | 1248.636357          | 1.90E-03 | GPCR         |

| Gene Name | P-value  | FC relative to normal | Expression in cancer | Expression in normal | FDR      | Pathway Name |
|-----------|----------|-----------------------|----------------------|----------------------|----------|--------------|
| GRK5      | 2.81E-04 | 0.206459494           | 1264.77568           | 6129.866918          | 4.95E-03 | GPCR         |
| PTGIR     | 1.92E-04 | 0.203476496           | 82.32939603          | 408.5283609          | 3.62E-03 | GPCR         |
| CXCL12    | 1.64E-04 | 0.200652326           | 697.4309425          | 3479.801627          | 3.18E-03 | GPCR         |
| CCL24     | 3.59E-03 | 0.199185533           | 26.9236971           | 139.1893834          | 3.72E-02 | GPCR         |
| RAMP2     | 1.55E-04 | 0.199132822           | 644.9994394          | 3243.063103          | 3.03E-03 | GPCR         |
| PSAP      | 1.58E-05 | 0.192643148           | 49748.80753          | 258247.5179          | 4.67E-04 | GPCR         |
| ENPP2     | 4.44E-04 | 0.190091358           | 1312.369965          | 6908.151363          | 7.17E-03 | GPCR         |
| IQGAP2    | 1.54E-03 | 0.186147471           | 730.4669569          | 3928.502514          | 1.93E-02 | GPCR         |
| CCL22     | 7.90E-04 | 0.185699616           | 50.57326467          | 276.7241321          | 1.14E-02 | GPCR         |
| HTR1F     | 3.95E-04 | 0.182673979           | 6.659729319          | 40.9311462           | 6.52E-03 | GPCR         |
| NMUR1     | 9.69E-04 | 0.177074523           | 33.18724696          | 192.0670004          | 1.34E-02 | GPCR         |
| CXCR5     | 4.09E-03 | 0.174776802           | 4.999095653          | 33.32432444          | 4.10E-02 | GPCR         |
| MRGPRX2   | 3.35E-03 | 0.172336605           | 0.317388498          | 6.644275556          | 3.52E-02 | GPCR         |
| AKR1C2    | 3.35E-06 | 0.17142009            | 116.4894201          | 684.3888584          | 1.26E-04 | GPCR         |
| GPR34     | 9.20E-04 | 0.169062933           | 263.6150121          | 1564.186455          | 1.28E-02 | GPCR         |
| CXCL13    | 4.94E-03 | 0.168824895           | 930.2673929          | 5515.173388          | 4.72E-02 | GPCR         |
| RAC2      | 7.65E-06 | 0.168411644           | 1078.143354          | 6406.771641          | 2.54E-04 | GPCR         |
| CCL21     | 3.42E-04 | 0.16780788            | 595.0201273          | 3550.800589          | 5.81E-03 | GPCR         |
| FZD4      | 6.00E-05 | 0.164539055           | 678.1093557          | 4126.34445           | 1.41E-03 | GPCR         |
| CMKLR1    | 1.62E-03 | 0.162874345           | 642.7451923          | 3951.403884          | 2.00E-02 | GPCR         |
| PLEK      | 9.75E-06 | 0.162218108           | 961.7193348          | 5933.72175           | 3.09E-04 | GPCR         |
| SPNS2     | 1.08E-05 | 0.160942235           | 350.7421499          | 2184.517985          | 3.37E-04 | GPCR         |
| GPR39     | 1.71E-03 | 0.159013347           | 58.02680117          | 370.2065832          | 2.09E-02 | GPCR         |
| PDE4D     | 4.41E-07 | 0.157804785           | 615.1573996          | 3903.554606          | 2.32E-05 | GPCR         |
| GPR85     | 7.89E-04 | 0.153578719           | 69.78103737          | 459.8779001          | 1.13E-02 | GPCR         |
| EDNRA     | 4.40E-05 | 0.151501404           | 296.7559273          | 1964.367441          | 1.09E-03 | GPCR         |
| CCR1      | 1.92E-05 | 0.147302415           | 435.4729579          | 2962.107956          | 5.50E-04 | GPCR         |
| OR6K3     | 1.80E-03 | 0.143339323           | 0.335573012          | 8.317561876          | 2.18E-02 | GPCR         |
| ADCY4     | 5.82E-06 | 0.138862546           | 159.2100246          | 1152.731005          | 2.01E-04 | GPCR         |
| RGS18     | 1.08E-04 | 0.137298312           | 98.33678587          | 722.5106105          | 2.25E-03 | GPCR         |
| DEFB4A    | 7.92E-04 | 0.134731248           | 0.547327491          | 10.48454803          | 1.14E-02 | GPCR         |
| PTGDR     | 2.92E-05 | 0.133206197           | 16.11536108          | 127.4877241          | 7.80E-04 | GPCR         |
| MRGPRF    | 7.38E-05 | 0.131820839           | 37.36223265          | 290.0179685          | 1.66E-03 | GPCR         |
| GPR110    | 7.25E-04 | 0.131563217           | 182.1656015          | 1391.225012          | 1.06E-02 | GPCR         |
| CCRL2     | 9.03E-07 | 0.130719697           | 188.6452516          | 1449.777935          | 4.25E-05 | GPCR         |
| AKAP13    | 4.64E-06 | 0.125693817           | 4684.776692          | 37278.29359          | 1.66E-04 | GPCR         |
| GLP2R     | 1.64E-05 | 0.124628622           | 4.686255491          | 44.62559861          | 4.83E-04 | GPCR         |

| Gene Name | P-value  | FC relative to normal | Expression in cancer | Expression in normal | FDR      | Pathway Name |
|-----------|----------|-----------------------|----------------------|----------------------|----------|--------------|
| CALCRL    | 2.15E-08 | 0.12450597            | 840.4512505          | 6757.32049           | 1.80E-06 | GPCR         |
| PDE6G     | 8.27E-05 | 0.122805909           | 45.38404742          | 376.7020803          | 1.82E-03 | GPCR         |
| C3AR1     | 2.22E-04 | 0.121366019           | 474.0822873          | 3913.458848          | 4.10E-03 | GPCR         |
| GABRE     | 2.10E-06 | 0.118033733           | 80.77075243          | 691.7744313          | 8.56E-05 | GPCR         |
| GPR123    | 1.17E-03 | 0.117918677           | 1.915311202          | 23.7230657           | 1.54E-02 | GPCR         |
| CX3CL1    | 1.16E-06 | 0.116410788           | 901.8914946          | 7755.080938          | 5.21E-05 | GPCR         |
| CX3CR1    | 4.67E-05 | 0.116305481           | 67.51466213          | 588.0922893          | 1.14E-03 | GPCR         |
| GNGT2     | 3.99E-06 | 0.115696425           | 58.96788749          | 517.321008           | 1.46E-04 | GPCR         |
| P2RY2     | 4.16E-08 | 0.114792769           | 52.71556626          | 466.9351039          | 3.13E-06 | GPCR         |
| GPR97     | 2.81E-03 | 0.113721878           | 29.14239541          | 264.0536197          | 3.08E-02 | GPCR         |
| P2RY13    | 9.77E-05 | 0.110822794           | 127.3190005          | 1156.875521          | 2.07E-03 | GPCR         |
| TGM2      | 1.24E-06 | 0.110335439           | 4155.951192          | 37674.57585          | 5.54E-05 | GPCR         |
| LRP1      | 1.05E-05 | 0.108523414           | 4884.78407           | 45019.55269          | 3.30E-04 | GPCR         |
| APOE      | 2.11E-04 | 0.108428591           | 8993.325896          | 82950.60749          | 3.92E-03 | GPCR         |
| PTGER2    | 3.19E-04 | 0.107052915           | 98.8264416           | 931.496246           | 5.48E-03 | GPCR         |
| GNG7      | 5.21E-09 | 0.102819188           | 101.7380867          | 998.2112253          | 5.53E-07 | GPCR         |
| ADCY7     | 7.86E-05 | 0.102552507           | 251.3862942          | 2460.044604          | 1.75E-03 | GPCR         |
| RAMP3     | 5.74E-07 | 0.101263172           | 275.5727976          | 2730.227879          | 2.91E-05 | GPCR         |
| ARRB1     | 4.01E-08 | 0.101262636           | 784.1072287          | 7752.177871          | 3.03E-06 | GPCR         |
| GPR87     | 4.67E-03 | 0.100914384           | 9.765956694          | 105.6840647          | 4.53E-02 | GPCR         |
| CISH      | 3.28E-09 | 0.100398571           | 395.4461499          | 3947.723037          | 3.75E-07 | GPCR         |
| CCL2      | 3.03E-06 | 0.099173725           | 506.3546535          | 5114.817259          | 1.16E-04 | GPCR         |
| GNG11     | 1.29E-12 | 0.098547542           | 606.2022685          | 6160.516111          | 5.73E-10 | GPCR         |
| GPR133    | 5.74E-06 | 0.094314595           | 413.1050478          | 4389.67831           | 1.99E-04 | GPCR         |
| C3        | 3.93E-07 | 0.094097715           | 5792.498703          | 61567.96256          | 2.10E-05 | GPCR         |
| GPR65     | 4.21E-08 | 0.093990621           | 138.0711542          | 1478.627989          | 3.15E-06 | GPCR         |
| NPR3      | 9.00E-05 | 0.090797592           | 283.6899312          | 3134.434805          | 1.95E-03 | GPCR         |
| P2RY12    | 3.25E-05 | 0.088054186           | 23.80967131          | 280.7545931          | 8.51E-04 | GPCR         |
| S1PR1     | 9.16E-09 | 0.084489982           | 701.978193           | 8319.25497           | 8.86E-07 | GPCR         |
| PSAPL1    | 4.81E-04 | 0.08259737            | 1.537772567          | 29.72461727          | 7.64E-03 | GPCR         |
| S1PR4     | 7.12E-09 | 0.080365574           | 96.27153758          | 1209.36325           | 7.19E-07 | GPCR         |
| AGTR1     | 1.36E-03 | 0.07722643            | 44.4762131           | 587.868514           | 1.74E-02 | GPCR         |
| VIPR1     | 6.41E-06 | 0.076979703           | 377.2993572          | 4913.274084          | 2.19E-04 | GPCR         |
| C5AR1     | 1.56E-09 | 0.07447867            | 576.8912597          | 7758.151141          | 1.98E-07 | GPCR         |
| ADCY8     | 1.87E-05 | 0.07432983            | 12.74810857          | 183.9608498          | 5.38E-04 | GPCR         |
| PTH1R     | 6.72E-08 | 0.07214764            | 36.92080028          | 524.6000102          | 4.68E-06 | GPCR         |
| CD97      | 1.76E-10 | 0.071348975           | 1030.750738          | 14459.62449          | 3.25E-08 | GPCR         |



| Gene Name | P-value  | FC relative to normal | Expression in cancer | Expression in normal | FDR      | Pathway Name |
|-----------|----------|-----------------------|----------------------|----------------------|----------|--------------|
| FCN1      | 7.45E-06 | 0.070440908           | 95.50807235          | 1369.057185          | 2.48E-04 | GPCR         |
| PTAFR     | 4.45E-08 | 0.070121139           | 507.1372672          | 7245.563234          | 3.29E-06 | GPCR         |
| CXCL1     | 1.67E-07 | 0.069441608           | 246.1928501          | 3558.722423          | 1.03E-05 | GPCR         |
| EMR3      | 5.60E-08 | 0.066045654           | 11.33786491          | 185.808126           | 4.06E-06 | GPCR         |
| ADRB1     | 3.35E-06 | 0.065750018           | 97.69029337          | 1499.992653          | 1.26E-04 | GPCR         |
| EDN1      | 2.25E-08 | 0.064152357           | 332.1849327          | 5192.650645          | 1.86E-06 | GPCR         |
| CA2       | 3.25E-12 | 0.063333849           | 364.6746923          | 5772.763915          | 1.20E-09 | GPCR         |
| EREG      | 9.71E-08 | 0.058157334           | 13.44561684          | 247.3885671          | 6.43E-06 | GPCR         |
| GPR126    | 7.52E-11 | 0.057377071           | 198.6929291          | 3479.361163          | 1.64E-08 | GPCR         |
| GPR17     | 9.42E-07 | 0.054760409           | 3.807133874          | 86.78484186          | 4.38E-05 | GPCR         |
| CCL17     | 2.30E-06 | 0.054491839           | 10.82089854          | 215.9297035          | 9.27E-05 | GPCR         |
| HPGD      | 1.85E-06 | 0.052719659           | 429.3862921          | 8162.677425          | 7.72E-05 | GPCR         |
| AGTR2     | 7.00E-04 | 0.050786953           | 94.28686608          | 1875.20758           | 1.03E-02 | GPCR         |
| CXCR1     | 1.06E-04 | 0.050106683           | 21.73033688          | 452.6388296          | 2.22E-03 | GPCR         |
| RXFP1     | 2.92E-06 | 0.049163169           | 36.46078899          | 760.9685649          | 1.12E-04 | GPCR         |
| GPR116    | 2.17E-12 | 0.048644244           | 1645.319099          | 33843.0682           | 8.98E-10 | GPCR         |
| CXCR2     | 5.23E-06 | 0.047199277           | 30.67709832          | 670.1352429          | 1.84E-04 | GPCR         |
| EDNRB     | 2.21E-10 | 0.047159822           | 497.4197741          | 10567.73745          | 3.90E-08 | GPCR         |
| SCTR      | 1.46E-07 | 0.047037072           | 95.96995065          | 2060.564339          | 9.14E-06 | GPCR         |
| AKR1C3    | 6.39E-14 | 0.041505004           | 132.2111541          | 3208.52036           | 4.77E-11 | GPCR         |
| HCAR3     | 4.29E-05 | 0.041104458           | 6.893260068          | 191.0292952          | 1.07E-03 | GPCR         |
| NPR1      | 2.42E-11 | 0.040331036           | 183.1349477          | 4564.589345          | 6.48E-09 | GPCR         |
| ADRA1A    | 1.44E-04 | 0.039706627           | 4.530461314          | 138.2830814          | 2.85E-03 | GPCR         |
| GPRC5A    | 1.82E-08 | 0.03825198            | 2108.71817           | 55152.1754           | 1.58E-06 | GPCR         |
| AREG      | 8.00E-13 | 0.037203463           | 120.2324825          | 3257.634384          | 3.83E-10 | GPCR         |
| FPR1      | 1.63E-08 | 0.036030132           | 215.8592327          | 6017.82977           | 1.43E-06 | GPCR         |
| CCL20     | 8.00E-06 | 0.033219699           | 99.22113059          | 3015.918703          | 2.63E-04 | GPCR         |
| CCL23     | 9.69E-05 | 0.030908794           | 3.833424906          | 155.3770129          | 2.06E-03 | GPCR         |
| EMR1      | 5.86E-11 | 0.029194362           | 26.74805354          | 949.4593268          | 1.33E-08 | GPCR         |
| PPARG     | 7.55E-20 | 0.028812268           | 157.1469696          | 5487.876039          | 5.92E-16 | GPCR         |
| PF4       | 6.29E-07 | 0.028055575           | 3.575422655          | 162.084256           | 3.13E-05 | GPCR         |
| CAV1      | 2.49E-14 | 0.028013781           | 1790.150817          | 63937.20274          | 2.40E-11 | GPCR         |
| AGRP      | 2.16E-15 | 0.024486733           | 8.474594595          | 385.9276672          | 3.48E-12 | GPCR         |
| RXFP2     | 2.14E-06 | 0.0240853             | 0.434539449          | 58.56078805          | 8.73E-05 | GPCR         |
| CXCL3     | 1.64E-13 | 0.022183877           | 59.49505964          | 2725.983245          | 1.05E-10 | GPCR         |
| ADRB2     | 2.58E-15 | 0.021057942           | 63.66013541          | 3069.581947          | 3.82E-12 | GPCR         |
| HCAR2     | 3.32E-13 | 0.020911719           | 30.80985792          | 1520.149806          | 1.80E-10 | GPCR         |

| Gene Name | P-value  | FC relative to normal | Expression in cancer | Expression in normal | FDR      | Pathway Name |
|-----------|----------|-----------------------|----------------------|----------------------|----------|--------------|
| FPR2      | 2.07E-09 | 0.017991581           | 46.06683192          | 2615.047597          | 2.54E-07 | GPCR         |
| PPBP      | 1.09E-08 | 0.017752394           | 7.609364591          | 483.9692134          | 1.03E-06 | GPCR         |
| CXCL2     | 1.08E-15 | 0.016868272           | 306.4248645          | 18224.03623          | 1.93E-12 | GPCR         |
| CXCL5     | 3.89E-13 | 0.008187224           | 28.64560614          | 3619.959441          | 2.07E-10 | GPCR         |
| FGF5      | 3.98E-06 | 250.0843804           | 1502.933697          | 5.013705035          | 1.46E-04 | MAPK         |
| CACNG5    | 2.68E-07 | 114.323245            | 239.568702           | 1.104285108          | 1.50E-05 | MAPK         |
| CACNA1E   | 1.52E-08 | 45.04869609           | 1463.196723          | 31.50253282          | 1.35E-06 | MAPK         |
| PRKCG     | 1.54E-04 | 34.52551166           | 217.9491251          | 5.341661993          | 3.02E-03 | MAPK         |
| CACNA1A   | 5.36E-07 | 25.31665836           | 18718.79936          | 738.4261555          | 2.75E-05 | MAPK         |
| FGF12     | 2.27E-08 | 15.3934378            | 2161.531901          | 139.484012           | 1.87E-06 | MAPK         |
| CACNA1B   | 1.25E-04 | 14.31484136           | 2330.635069          | 161.8823547          | 2.54E-03 | MAPK         |
| MAPT      | 1.83E-05 | 13.14448227           | 80.31690602          | 5.186390942          | 5.29E-04 | MAPK         |
| CACNG2    | 1.72E-03 | 12.64625778           | 63.00438713          | 4.061132568          | 2.10E-02 | MAPK         |
| CACNA2D1  | 7.51E-06 | 11.03474552           | 10628.59772          | 962.2843543          | 2.49E-04 | MAPK         |
| CACNA1G   | 7.01E-04 | 10.20324002           | 341.3202919          | 32.55015575          | 1.03E-02 | MAPK         |
| MAPK8IP2  | 5.70E-10 | 8.793468974           | 2464.539791          | 279.3830659          | 8.70E-08 | MAPK         |
| STMN1     | 6.52E-14 | 8.643312775           | 92106.78894          | 10655.53776          | 4.81E-11 | MAPK         |
| NTF3      | 9.88E-04 | 8.065565436           | 477.0552766          | 58.27114229          | 1.36E-02 | MAPK         |
| MAPK8IP1  | 9.84E-10 | 7.412878483           | 4631.668366          | 623.9486453          | 1.36E-07 | MAPK         |
| FGF9      | 9.64E-04 | 5.914575834           | 705.0320854          | 118.3715501          | 1.33E-02 | MAPK         |
| FGF17     | 3.33E-03 | 5.84373832            | 128.8429145          | 21.21915278          | 3.51E-02 | MAPK         |
| RPS6KA6   | 4.69E-03 | 5.514252496           | 1809.662792          | 327.3605154          | 4.54E-02 | MAPK         |
| RAC3      | 6.99E-06 | 5.283828579           | 1819.478089          | 343.5376892          | 2.36E-04 | MAPK         |
| DUSP4     | 2.58E-04 | 4.65670764            | 4090.987628          | 877.7297688          | 4.63E-03 | MAPK         |
| CACNB3    | 1.93E-05 | 4.076029334           | 3515.297815          | 861.6772595          | 5.54E-04 | MAPK         |
| MAPK12    | 1.89E-03 | 3.447943949           | 1229.604331          | 355.9096102          | 2.26E-02 | MAPK         |
| MAP2K6    | 1.08E-03 | 3.290546242           | 750.7035341          | 227.4433887          | 1.45E-02 | MAPK         |
| PPP5C     | 2.60E-05 | 2.722659607           | 9428.847311          | 3462.46906           | 7.07E-04 | MAPK         |
| GADD45G   | 3.53E-03 | 2.56738265            | 3635.258831          | 1415.329129          | 3.66E-02 | MAPK         |
| CDC25B    | 6.99E-05 | 2.457148456           | 11801.22489          | 4802.220116          | 1.59E-03 | MAPK         |
| ELK1      | 2.53E-03 | 2.08927206            | 4478.93334           | 2143.255612          | 2.84E-02 | MAPK         |
| NRAS      | 2.89E-03 | 2.039024506           | 9092.775873          | 4458.865905          | 3.15E-02 | MAPK         |
| RAP1A     | 9.38E-04 | 0.408570877           | 4369.919817          | 10697.06993          | 1.30E-02 | MAPK         |
| JUND      | 3.31E-04 | 0.397638012           | 10257.24327          | 25796.94425          | 5.66E-03 | MAPK         |
| DUSP3     | 2.65E-03 | 0.392789884           | 3326.185629          | 8469.649995          | 2.94E-02 | MAPK         |
| FGF2      | 5.18E-03 | 0.381772691           | 253.6959132          | 666.14021            | 4.90E-02 | MAPK         |
| DUSP5     | 2.60E-03 | 0.374634559           | 549.6021628          | 1468.704674          | 2.90E-02 | MAPK         |

| Gene Name | P-value  | FC relative to normal | Expression in cancer | Expression in normal | FDR      | Pathway Name |
|-----------|----------|-----------------------|----------------------|----------------------|----------|--------------|
| RAPGEF2   | 2.63E-03 | 0.364485275           | 1827.828016          | 5016.563514          | 2.93E-02 | MAPK         |
| NFKB2     | 3.39E-04 | 0.355578403           | 1075.890319          | 3027.559409          | 5.77E-03 | MAPK         |
| MKNK2     | 8.46E-04 | 0.35464169            | 5979.074516          | 16861.29984          | 1.20E-02 | MAPK         |
| MAP2K3    | 4.36E-05 | 0.338402115           | 1668.146923          | 4931.436447          | 1.09E-03 | MAPK         |
| NFKB1     | 1.27E-04 | 0.326074618           | 1733.616549          | 5318.69204           | 2.58E-03 | MAPK         |
| ARRB2     | 1.13E-03 | 0.322314411           | 3612.975507          | 11211.5781           | 1.51E-02 | MAPK         |
| TAOK3     | 1.44E-03 | 0.318981979           | 1507.25747           | 4727.34695           | 1.82E-02 | MAPK         |
| JUN       | 5.13E-03 | 0.316521107           | 17513.33224          | 55332.85249          | 4.87E-02 | MAPK         |
| TGFB2     | 3.14E-03 | 0.292979251           | 405.5352152          | 1386.590463          | 3.36E-02 | MAPK         |
| PDGFB     | 2.65E-03 | 0.282601253           | 638.2594819          | 2261.054659          | 2.94E-02 | MAPK         |
| CACNB4    | 2.66E-03 | 0.277385296           | 258.962507           | 936.1892111          | 2.96E-02 | MAPK         |
| MEF2C     | 2.85E-04 | 0.267936904           | 708.5218874          | 2647.093175          | 5.02E-03 | MAPK         |
| PDGFRB    | 3.46E-03 | 0.267184114           | 1567.228511          | 5868.467636          | 3.61E-02 | MAPK         |
| MYC       | 4.75E-03 | 0.265506185           | 1587.685439          | 5982.609917          | 4.59E-02 | MAPK         |
| FLNA      | 7.74E-04 | 0.261882208           | 20396.33912          | 77886.45678          | 1.12E-02 | MAPK         |
| FAS       | 1.38E-04 | 0.232672564           | 573.1946693          | 2466.822847          | 2.75E-03 | MAPK         |
| MECOM     | 2.52E-04 | 0.221360985           | 1561.326634          | 7056.822909          | 4.55E-03 | MAPK         |
| PDGFA     | 8.80E-06 | 0.219837675           | 368.1708183          | 1678.288222          | 2.84E-04 | MAPK         |
| CD14      | 4.64E-04 | 0.19451088            | 1354.723693          | 6968.911872          | 7.43E-03 | MAPK         |
| MAPKAPK3  | 3.12E-06 | 0.185630936           | 1051.170181          | 5667.075599          | 1.19E-04 | MAPK         |
| PLA2G5    | 3.85E-04 | 0.17426102            | 36.36384319          | 213.4130872          | 6.40E-03 | MAPK         |
| DUSP6     | 1.82E-07 | 0.169032279           | 2219.752443          | 13137.03761          | 1.10E-05 | MAPK         |
| RAC2      | 7.65E-06 | 0.168411644           | 1078.143354          | 6406.771641          | 2.54E-04 | MAPK         |
| RPS6KA2   | 1.32E-07 | 0.156055416           | 2063.889672          | 13230.77194          | 8.43E-06 | MAPK         |
| TNFRSF1A  | 3.39E-08 | 0.155998109           | 1589.905288          | 10197.23443          | 2.63E-06 | MAPK         |
| FGF7      | 3.60E-04 | 0.151571224           | 208.5338344          | 1381.411707          | 6.07E-03 | MAPK         |
| IL1R2     | 1.34E-03 | 0.122429152           | 51.64373102          | 428.9934287          | 1.72E-02 | MAPK         |
| NR4A1     | 2.34E-08 | 0.119400186           | 1837.467844          | 15396.5291           | 1.92E-06 | MAPK         |
| IL1B      | 2.11E-06 | 0.114573885           | 96.55690242          | 850.4759016          | 8.62E-05 | MAPK         |
| TGFB1     | 1.14E-08 | 0.113842842           | 960.7705508          | 8447.230363          | 1.06E-06 | MAPK         |
| RRAS      | 7.09E-11 | 0.103232344           | 697.7812849          | 6768.014987          | 1.57E-08 | MAPK         |
| ARRB1     | 4.01E-08 | 0.101262636           | 784.1072287          | 7752.177871          | 3.03E-06 | MAPK         |
| CHP2      | 3.16E-03 | 0.098109029           | 1.63919136           | 25.90059612          | 3.37E-02 | MAPK         |
| FGFR3     | 1.91E-05 | 0.09778406            | 348.0096079          | 3568.187133          | 5.48E-04 | MAPK         |
| EGF       | 8.66E-05 | 0.096658351           | 22.70470755          | 244.2422094          | 1.89E-03 | MAPK         |
| IL1R1     | 1.86E-08 | 0.092138537           | 1432.833859          | 15560.71727          | 1.61E-06 | MAPK         |
| RASGRP2   | 9.90E-09 | 0.090296033           | 166.4773197          | 1853.758331          | 9.44E-07 | MAPK         |

| Gene Name | P-value  | FC relative to normal | Expression in cancer | Expression in normal | FDR      | Pathway Name |
|-----------|----------|-----------------------|----------------------|----------------------|----------|--------------|
| MAP3K8    | 7.39E-13 | 0.07245303            | 291.4702115          | 4035.687124          | 3.62E-10 | MAPK         |
| FGFR2     | 1.37E-05 | 0.070806438           | 532.1341088          | 7528.458097          | 4.14E-04 | MAPK         |
| PLA2G12B  | 1.39E-03 | 0.066917413           | 13.0708473           | 209.2718349          | 1.77E-02 | MAPK         |
| CACNA2D2  | 7.13E-07 | 0.065156218           | 1482.145782          | 22761.92004          | 3.50E-05 | MAPK         |
| TGFBR2    | 4.05E-12 | 0.05671664            | 2044.803339          | 36069.6018           | 1.47E-09 | MAPK         |
| DUSP1     | 2.11E-16 | 0.056434711           | 4875.34923           | 86405.91379          | 5.50E-13 | MAPK         |
| RASGRP4   | 2.10E-08 | 0.049980307           | 39.15465542          | 802.4095391          | 1.78E-06 | MAPK         |
| FOS       | 1.09E-13 | 0.04796214            | 5301.259636          | 110549.9394          | 7.49E-11 | MAPK         |
| PLA2G2A   | 2.20E-05 | 0.046046185           | 31.71178169          | 709.412416           | 6.18E-04 | MAPK         |
| GADD45B   | 1.27E-12 | 0.04524149            | 770.4117456          | 17049.98004          | 5.71E-10 | MAPK         |
| IL1A      | 2.81E-08 | 0.04208595            | 9.26061916           | 242.8015345          | 2.26E-06 | MAPK         |
| FGFR4     | 4.61E-10 | 0.04179513            | 105.8142219          | 2554.661902          | 7.26E-08 | MAPK         |
| FGF10     | 9.14E-10 | 0.041493664           | 2.948929182          | 94.16944938          | 1.30E-07 | MAPK         |
| PLA2G4E   | 2.86E-04 | 0.0403535             | 33.52375272          | 854.5330378          | 5.03E-03 | MAPK         |
| NTF4      | 1.23E-09 | 0.038190112           | 5.671362936          | 173.6882272          | 1.63E-07 | MAPK         |
| PLA2G1B   | 1.29E-10 | 0.021556552           | 18.50079271          | 903.6341308          | 2.53E-08 | MAPK         |
| RASGRF1   | 2.25E-12 | 0.018242058           | 83.48843375          | 4630.518818          | 9.11E-10 | MAPK         |
